# Supplementary material for: Organocatalytic enantioselective (4+3) cyclization for the synthesis of spiro-fused heterocyclic compounds containing isoindolinone, oxepine and indole moieties
Source: Royal Society of Chemistry journal article supplement (doi:10.1039/d4cc03230f), 2024-01-01
Supplement: d4cc03230f1.pdf [file d4cc03230f1.pdf]

# Organocatalytic Enantioselective (4+3) Cyclization for the Synthesis of Spiro-Fused Heterocyclic Compounds Containing Isoindolinone, Oxepine and Indole Moieties

Kanghua Rui, Shaoying Huang, Yinong Wu, Hanxiao Shen and Xufeng Lin<sup>a\*</sup>

*Center of Chemistry for Frontier Technologies, Department of Chemistry, Zhejiang University, Hangzhou 310058, China*

\*Email: [lxfok@zju.edu.cn](mailto:lxfok@zju.edu.cn)

## Table of Contents

|                                                                    |    |
|--------------------------------------------------------------------|----|
| 1. General information .....                                       | 1  |
| 2. Methods of synthesizing substrates .....                        | 2  |
| 3. Optimization of reaction conditions of 3a .....                 | 4  |
| 4. General procedure to synthesize target compound 3 .....         | 5  |
| 5. Characterization data of target products 3 .....                | 6  |
| 6. Experimental Procedures for the Transformation of 3s to 8 ..... | 30 |
| 8. Scale-up experiment .....                                       | 32 |
| 9. HR MS copies of intermediates .....                             | 32 |
| 10. X-Ray Structure and Crystal Data of 3c .....                   | 33 |
| 11. Copies of NMR spectra .....                                    | 35 |
| 12. HPLC data .....                                                | 69 |
| 13. References .....                                               | 98 |

## 1. General information

All solvents and reagents were purchased at the highest commercial quality and used without further purification, unless otherwise stated. Analytical thin layer chromatography (TLC) was performed on precoated silica gel 50 GF254 plates. Flash column chromatography was performed using silica gel (100-200 mesh). Visualization on TLC

was achieved by use of UV light (254, 365nm). Chemicals were purchased from commercial suppliers and used without further purification unless otherwise stated. <sup>1</sup>H, <sup>13</sup>C, <sup>19</sup>F NMR spectra were collected on a Bruker AV 400 MHz NMR spectrometer using residue solvent peaks as an internal standard (<sup>1</sup>H NMR: CDCl<sub>3</sub> at 7.26 ppm; CD<sub>2</sub>Cl<sub>2</sub> at 5.32 ppm; acetone-D<sub>6</sub> at 2.05 ppm; <sup>13</sup>C NMR: CDCl<sub>3</sub> at 77.16 ppm; CD<sub>2</sub>Cl<sub>2</sub> at 53.84 ppm; acetone-D<sub>6</sub> at 29.84 ppm). Multiplicities were given as s (singlet), d (doublet), t (triplet), dd (doublets of doublet), or m (multiplets). The number of protons (n) for a given resonance is indicated by nH. Coupling constants were reported as a J value in hertz. A high resolution mass spectrum (HRMS) was determined by 1290II-6230 TOF using ESI ionization. Infrared spectra were recorded on an ATR-FTIR spectrometer (NICOLET iS10). Optical rotations were reported as follows: [α]<sub>D</sub><sup>20</sup> (c: g/100 mL, in DCM). Enantiomeric excess was determined by chiral high-performance liquid chromatography (chiral HPLC) using DAICEL CHIRALPAK columns such as IA, AD-H, IE-3, IC-3, and IB-3. The melting point of each compound was determined by melting point meter SGW X-4A. Fluorescence measurements were performed on an Agilent Cary Eclipse Fluorescence Spectrophotometer. The racemic products employed to determine enantiomeric ratios were prepared by using diphenylphosphate as a catalyst. Optical rotation values were measured with instruments operating at λ = 589 nm, corresponding to the sodium D line at the temperatures indicated. The racemic products employed to determine enantiomeric ratios were synthesized by using 1,1'-binaphthyl-2,2'-diyl hydrogen phosphate as a catalyst. The all of chiral phosphoric acid catalysis were purchased from Daicel Chiral Technologies (CHINA) CO. LTD.

## 2. Methods of synthesizing substrates

### 2.1 Methods of synthesizing substrates 2-indolylmethanols **1**

2-Indolylmethanols **1** are known compounds and were synthesized according to the literature procedures.<sup>1-5</sup>

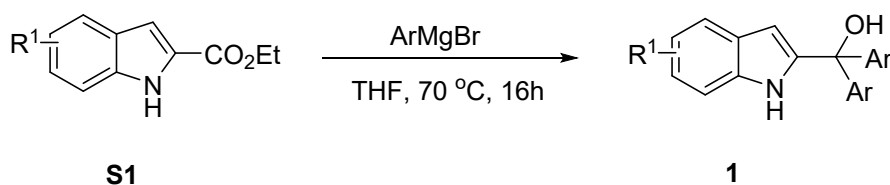

Under argon atmosphere, arylmagnesium bromide (20 mmol, 4 equiv.) was added to a Schlenk bottle. Then, the solution of ethyl 1*H*-indole-2-carboxylate **S1** (5 mmol, 1 equiv.) in anhydrous THF was added dropwise to the Schlenk bottle at RT. Subsequently, the reaction mixture was stirred at 70 °C in an oil bath overnight. After the completion of the reaction indicated by TLC, the reaction mixture was quenched by saturated ammonium chloride solution and extracted by ethyl acetate for three times. The combined organic layers were dried and concentrated under reduced pressure to give a residue. Finally, the residue was purified by flash column chromatography on silica gel to afford pure 2-indolylmethanols **1**.

Compounds **1** were similar with the previously reported work.<sup>1-5</sup>

## 2.2 Methods of synthesizing substrates $\alpha$ -(3-isoindolinonyl)propargylic alcohol **2**

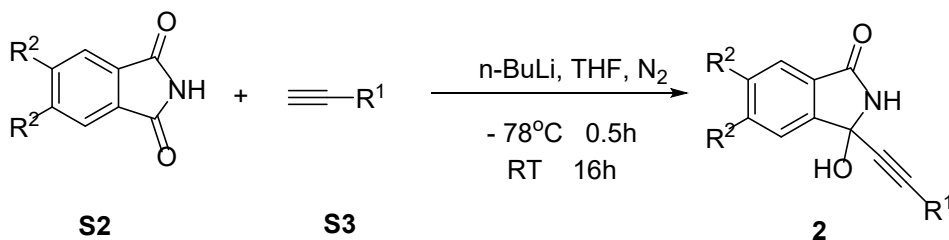

All  $\alpha$ -(3-isoindolinonyl)propargylic alcohol **2** substrates were synthesized according to the reported literature.<sup>6-11</sup> At -78 °C, under N<sub>2</sub>, a flame-dried flask charged with a solution of the terminal alkyne **S3** (6 mmol, 3.0 equiv) in dry THF (15 mL), was added n-BuLi (6 mmol, 3.0 equiv) dropwise. The reaction was stirred for 0.5 h at -78 °C. Then a solution of **S2** (2 mmol, 1.0 equiv) in THF (5 mL) was added via syringe at -78 °C. The reaction mixture was then slowly warmed up to room temperature and stirred for 16 h. Upon completion, the reaction mixture was cooled to 0 °C and a saturated aqueous NH<sub>4</sub>Cl solution (10 mL) was added dropwise. The organic layer was separated. The aqueous layer was extracted with ethyl acetate (3×10 mL). The combined organic layers were washed with brine (30 mL), dried over anhydrous Na<sub>2</sub>SO<sub>4</sub>, filtered, and concentrated. The crude product was purified directly by flash column chromatography on silica gel (petroleum

ether/ ethyl acetate = 10:1~5:1) to give the desired  $\alpha$ -(3-isoindolinonyl)propargylic alcohol

2.

Compounds **2** were similar with the previously reported work.<sup>6-11</sup>

### 3. Optimization of reaction conditions of **3a**

Table S1. Optimization of the reaction conditions of **3a**

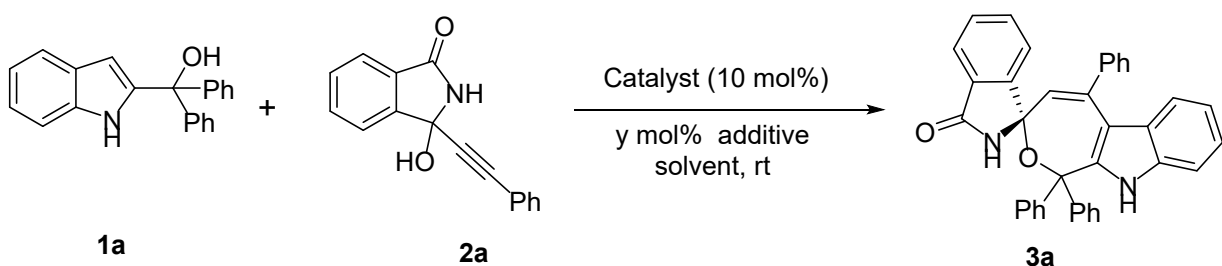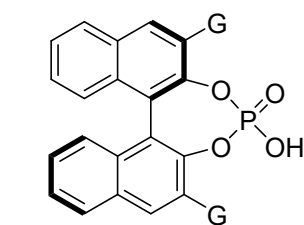

(*R*)-**A1**: G = 9-anthracenyl  
 (*R*)-**A2**: G = 3,5-(CF<sub>3</sub>)<sub>2</sub>C<sub>6</sub>H<sub>3</sub>  
 (*R*)-**A3**: G = 9-phenanthrenyl  
 (*R*)-**A4**: G = 4-Ph-C<sub>6</sub>H<sub>4</sub>  
 (*R*)-**A5**: G = 4-NO<sub>2</sub>-C<sub>6</sub>H<sub>4</sub>  
 (*R*)-**A6**: G = 2,4,6-(Me)<sub>3</sub>Ph

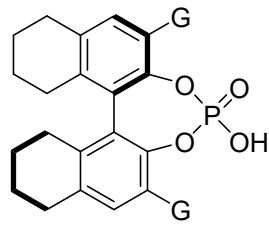

(*R*)-**B1**: G = 9-anthracenyl

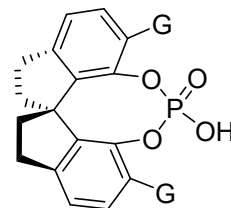

(*R*)-**C1**: G = 9-anthracenyl  
 (*S*)-**C2**: G = 2,4,6-(Me)<sub>3</sub>Ph  
 (*S*)-**C3**: G = 9-phenanthrenyl

| <sup>a</sup> Entry | Catalyst (10 mol%)      | Solvent (5 mL) | y mol% | additive | Yield (%) <sup>b</sup> | ee (%) <sup>c</sup> |
|--------------------|-------------------------|----------------|--------|----------|------------------------|---------------------|
| 1                  | ( <i>R</i> )- <b>A1</b> | DCM            | 0      | -        | 60                     | 74                  |
| 2                  | ( <i>R</i> )- <b>A2</b> | DCM            | 0      | -        | 72                     | 8                   |
| 3                  | ( <i>R</i> )- <b>A3</b> | DCM            | 0      | -        | 27                     | 2                   |
| 4                  | ( <i>R</i> )- <b>A4</b> | DCM            | 0      | -        | 54                     | 5                   |
| 5                  | ( <i>R</i> )- <b>A5</b> | DCM            | 0      | -        | 91                     | 0                   |
| 6                  | ( <i>R</i> )- <b>A6</b> | DCM            | 0      | -        | 27                     | 48                  |

|                 |        |                                   |    |                                                      |    |    |
|-----------------|--------|-----------------------------------|----|------------------------------------------------------|----|----|
| 7               | (R)-B1 | DCM                               | 0  | -                                                    | 73 | 66 |
| 8               | (R)-C1 | DCM                               | 0  | -                                                    | 41 | 89 |
| 9               | (S)-C2 | DCM                               | 0  | -                                                    | 77 | 79 |
| 10              | (S)-C3 | DCM                               | 0  | -                                                    | 46 | 60 |
| 11              | (R)-C1 | DCM                               | 50 | 4-F-C <sub>6</sub> H <sub>4</sub> B(OH) <sub>2</sub> | -  | -  |
| 12              | (R)-C1 | DCM                               | 50 | 2,2,2-Trifluoroethanol                               | 33 | 79 |
| 13              | (R)-C1 | DCM                               | 50 | HFIP                                                 | 77 | 84 |
| 14              | (R)-C1 | DCM                               | 60 | HFIP                                                 | 82 | 85 |
| 15              | (R)-C1 | DCM                               | 70 | HFIP                                                 | 91 | 88 |
| 16              | (R)-C1 | DCM                               | 80 | HFIP                                                 | 92 | 83 |
| 17              | (R)-C1 | PhMe                              | 70 | HFIP                                                 | -  | -  |
| 18              | (R)-C1 | PhCl                              | 70 | HFIP                                                 | 81 | 79 |
| 19              | (R)-C1 | PhF                               | 70 | HFIP                                                 | 34 | 75 |
| 20              | (R)-C1 | Hexafluorobenzene                 | 70 | HFIP                                                 | 54 | 22 |
| 21              | (R)-C1 | THF                               | 70 | HFIP                                                 | -  | -  |
| 22              | (R)-C1 | CH <sub>3</sub> CFCl <sub>2</sub> | 70 | HFIP                                                 | 91 | 92 |
| 23 <sup>d</sup> | (R)-C1 | CH <sub>3</sub> CFCl <sub>2</sub> | 70 | HFIP                                                 | 78 | 89 |
| 24 <sup>e</sup> | (R)-C1 | CH <sub>3</sub> CFCl <sub>2</sub> | 70 | HFIP                                                 | -  | -  |
| 25 <sup>f</sup> | (R)-C1 | CH <sub>3</sub> CFCl <sub>2</sub> | 70 | HFIP                                                 | 62 | 90 |
| 26 <sup>g</sup> | (R)-C1 | CH <sub>3</sub> CFCl <sub>2</sub> | 70 | HFIP                                                 | 92 | 81 |
| 27              | (R)-C1 | CH <sub>3</sub> CFCl <sub>2</sub> | 0  | HFIP                                                 | 44 | 92 |
| 28 <sup>h</sup> | (R)-C1 | CH <sub>3</sub> CFCl <sub>2</sub> | 70 | HFIP                                                 | 62 | 92 |

<sup>a</sup>Unless noted, the reaction was carried out with **1a** (0.11 mmol), **2a** (0.1 mmol), and catalyst (10 mol %) in 5.0 mL of solvent at room temperature for 48 h. <sup>b</sup>Isolated yield. <sup>c</sup>The ee was determined by HPLC analysis on a chiral stationary phase. <sup>d</sup>Additive Na<sub>2</sub>SO<sub>4</sub> (30 mg). <sup>e</sup>Additive 4Å (30 mg). <sup>f</sup>Temperature at 0 °C. <sup>g</sup>Temperature at 40 °C. <sup>h</sup>(R)-C1 (5 mol %) was used.

#### 4. General procedure to synthesize target compound 3

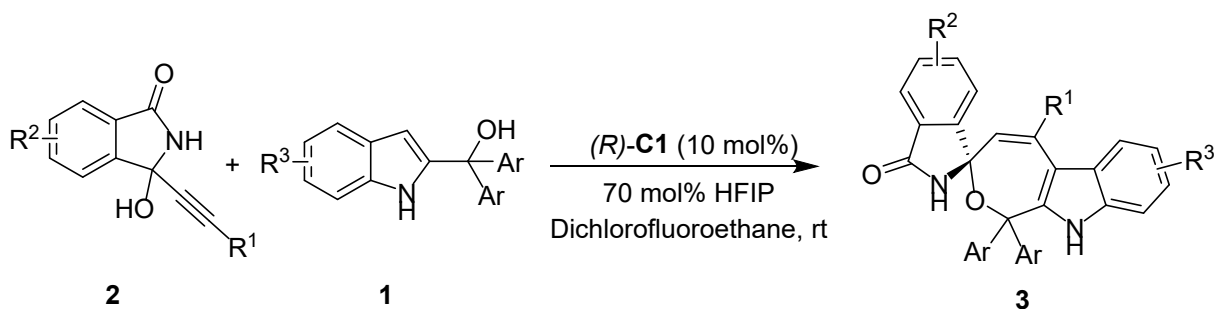

2-indolymethanols **1** (0.11 mmol, 1.1 eq),  $\alpha$ -(3-isoindolinonyl) propargylic alcohols **2** (0.1 mmol, 1.0 eq), chiral phosphoric acid (*R*)-**C1** (7.8 mg, 10 mol%, 0.01 mmol) and HFIP (12 mg, 70 mol%, 0.07 mmol) were added to a dried tube under an air atmosphere. Then, dichlorofluoroethane (5 mL) was added to the reaction mixture, which was stirred at rt for 48 h. After the completion of the reaction which was indicated by TLC, the reaction mixture was directly purified by column chromatography using pure DCM as eluent to afford products **3**.

## 5. Characterization data of target products **3**

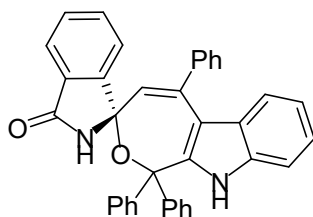

### (*S*)-1',1',5'-triphenyl-1',10'-dihydrospiro[isoindoline-1,3'-oxepino[3,4-b]indol]-3-one (**3a**)

The resultant residue was purified by flash silicagel column chromatography (eluent: pure DCM) to afford **3a** as a white solid in 91% yield (48 mg) with 92% ee.

<sup>1</sup>H NMR (400 MHz, CD<sub>2</sub>Cl<sub>2</sub>)  $\delta$  7.88 (s, 1H), 7.72 – 7.64 (m, 2H), 7.61 (t, *J*=7.5, 1H), 7.48 (t, *J*=7.4, 1H), 7.37 – 7.30 (m, 2H), 7.29 – 7.14 (m, 12H), 7.14 – 7.08 (m, 3H), 6.92 – 6.83 (m, 1H), 6.71 (d, *J*=8.0, 1H), 6.60 (s, 1H), 6.18 (s, 1H) ppm.

$^{13}\text{C}$  NMR (101 MHz,  $\text{CD}_2\text{Cl}_2$ )  $\delta$  169.4, 150.1, 145.6, 143.6, 143.5, 143.1, 138.9, 135.7, 133.6, 131.0, 130.1, 129.2, 129.0, 129.0, 128.7, 128.4, 128.3, 128.2, 128.0, 126.8, 126.3, 123.9, 123.6, 123.7, 121.7, 121.4, 114.6, 112.5, 89.0, 83.7 ppm.

HRMS (ESI-TOF)  $m/z$ :  $[\text{M} + \text{H}]^+$  Calcd for  $\text{C}_{37}\text{H}_{27}\text{N}_2\text{O}_2$  531.2067; Found: 531.2069.

IR (KBr,  $\text{cm}^{-1}$ ) 3401, 3227, 3038, 1709, 1533, 1492, 1434, 1409, 1233, 1007, 966.

M.P. 293-295 °C.  $[\alpha]_D^{20} = +55^\circ$  ( $c = 1.0$ ,  $\text{CH}_2\text{Cl}_2$ ).

HPLC (IE-3, hexane/isopropyl alcohol = 80/20, flow rate = 0.8 mL/min,  $\lambda = 254$  nm)  $t_R = 9.865$  min (minor), 14.954 min (major).

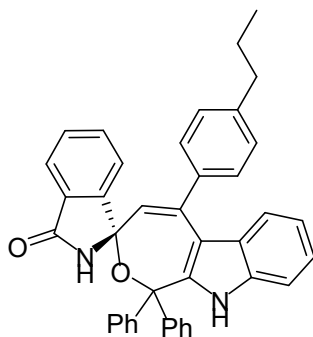

**(S)-1',1'-diphenyl-5'-(4-propylphenyl)-1',10'-dihydrospiro[isindoline-1,3'-oxepino[3,4-b]indol]-3-one (3b)**

The resultant residue was purified by flash silicagel column chromatography (eluent: pure DCM) to afford **3b** as a white solid in 81% yield (46 mg) with 94% ee.

$^1\text{H}$  NMR (400 MHz,  $\text{CD}_2\text{Cl}_2$ )  $\delta$  7.97 (s, 1H), 7.81 – 7.72 (m, 2H), 7.72 – 7.66 (m, 1H), 7.60 – 7.52 (m, 1H), 7.42 (d,  $J=7.0$ , 2H), 7.38 – 7.24 (m, 9H), 7.22 – 7.17 (m, 1H), 7.15 – 7.05 (m, 4H), 6.98 (t,  $J=7.3$ , 1H), 6.83 (d,  $J=8.1$ , 1H), 6.68 (s, 1H), 6.24 (s, 1H), 2.66 – 2.46 (m, 2H), 1.69 – 1.56 (m, 2H), 0.94 (t,  $J=7.3$ , 3H) ppm.

$^{13}\text{C}$  NMR (101 MHz,  $\text{CD}_2\text{Cl}_2$ )  $\delta$  169.5, 150.2, 145.8, 144.2, 143.8, 143.5, 143.1, 136.4, 135.8, 133.6, 131.1, 130.1, 129.1, 129.0, 128.9, 128.3, 128.2, 128.1, 126.9, 125.6, 124.0, 123.9, 123.8, 121.9, 121.4, 114.9, 112.5, 89.1, 83.7, 38.3, 25.1, 14.2 ppm.

HRMS (ESI-TOF)  $m/z$ :  $[\text{M} + \text{H}]^+$  Calcd for  $\text{C}_{40}\text{H}_{33}\text{N}_2\text{O}_2$  573.2537; Found: 573.2540.

IR (KBr,  $\text{cm}^{-1}$ ) 3378, 3217, 3002, 1716, 1522, 1487, 1411, 1253, 958.

**M.P.** 298-300 °C.  $[\alpha]_D^{20} = +37^\circ$  (c = 1.2, CH<sub>2</sub>Cl<sub>2</sub>).

**HPLC** (IE-3, hexane/isopropyl alcohol = 80/20, flow rate = 0.8 mL/min,  $\lambda = 254$  nm), tR = 8.896 min (minor), 12.755 min (major).

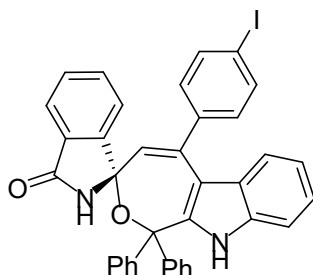

**(S)-5'-(4-iodophenyl)-1',1'-diphenyl-1',10'-dihydrospiro[isoindoline-1,3'-oxepino[3,4-b]indol]-3-one (3c)**

The resultant residue was purified by flash silicagel column chromatography (eluent: pure DCM) to afford **3c** as a white solid in 87% yield (57 mg) with 90% ee.

**<sup>1</sup>H NMR (400 MHz, CD<sub>2</sub>Cl<sub>2</sub>)**  $\delta$  7.99 (s, 1H), 7.81 – 7.67 (m, 3H), 7.64 – 7.54 (m, 3H), 7.51 – 7.12 (m, 12H), 7.04 – 6.92 (m, 3H), 6.84 (d, J=7.9, 1H), 6.68 (s, 1H), 6.27 (s, 1H) ppm.

**<sup>13</sup>C NMR (101 MHz, CD<sub>2</sub>Cl<sub>2</sub>)**  $\delta$  169.3, 149.8, 145.4, 143.7, 143.3, 142.0, 138.3, 137.9, 135.6, 133.6, 130.9, 130.2, 130.1, 129.1, 129.0, 128.9, 128.3, 128.2, 127.6, 126.7, 126.5, 123.9, 123.7, 121.6, 121.5, 113.9, 112.6, 95.0, 88.8, 83.6 ppm.

**HRMS (ESI-TOF)** m/z: [M + H]<sup>+</sup> Calcd for C<sub>37</sub>H<sub>26</sub>IN<sub>2</sub>O<sub>2</sub> 657.1033; Found: 657.1036.

**IR (KBr, cm<sup>-1</sup>)** 3586, 3428, 1704, 1444, 1370, 1275, 1005, 750, 700.

**M.P.** 314-316 °C.  $[\alpha]_D^{20} = +68^\circ$  (c = 1.0, CH<sub>2</sub>Cl<sub>2</sub>).

**HPLC** (IE-3, hexane/isopropyl alcohol = 85/15, flow rate = 1 mL/min,  $\lambda = 254$  nm), tR = 11.170 min (minor), 20.114 min (major).



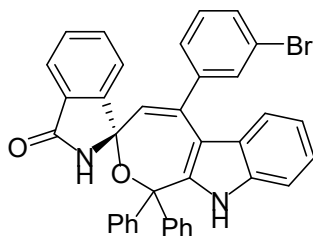

**(S)-5'-(3-bromophenyl)-1',1'-diphenyl-1',10'-dihydrospiro[isoindoline-1,3'-oxepino[3,4-b]indol]-3-one (3d)**

The resultant residue was purified by flash silicagel column chromatography (eluent: pure DCM) to afford **3d** as a white solid in 83% yield (50 mg) with 91% ee.

**<sup>1</sup>H NMR (400 MHz, CD<sub>2</sub>Cl<sub>2</sub>)** δ 7.99 (s, 1H), 7.81 – 7.66 (m, 3H), 7.57 (t, J=7.3, 1H), 7.48 – 7.26 (m, 13H), 7.23 (t, J=7.7, 1H), 7.17 – 7.11 (m, 2H), 7.01 (t, J=7.6, 1H), 6.84 (d, J=8.1, 1H), 6.68 (s, 1H), 6.27 (s, 1H) ppm.

**<sup>13</sup>C NMR (101 MHz, CD<sub>2</sub>Cl<sub>2</sub>)** δ 169.4, 149.8, 145.4, 143.8, 143.3, 141.6, 141.0, 135.7, 133.7, 132.0, 131.1, 130.9, 130.3, 130.2, 129.1, 129.1, 129.0, 128.3, 128.2, 127.9, 127.5, 127.2, 126.5, 123.99, 123.97, 123.7, 122.8, 121.6, 121.5, 113.9, 112.6, 88.8, 83.7 ppm.

**HRMS (ESI-TOF)** m/z: [M + H]<sup>+</sup> Calcd for C<sub>37</sub>H<sub>26</sub>BrN<sub>2</sub>O<sub>2</sub> 611.1152; Found: 611.1161

**IR (KBr, cm<sup>-1</sup>)** 3436, 3303, 3052, 2917, 1712, 1599, 1468, 1367, 1264, 1001, 699.

**M.P.** 295-297 °C. [α]<sub>D</sub><sup>20</sup> = +26 ° (c = 1.1, CH<sub>2</sub>Cl<sub>2</sub>).

**HPLC** (IE-3, hexane/isopropyl alcohol = 85/15, flow rate = 1 mL/min, λ = 254 nm), tR = 7.343 min (major), 9.531 min (minor).

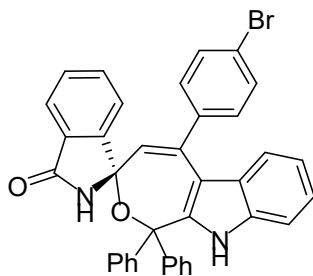

**(S)-5'-(4-bromophenyl)-1',1'-diphenyl-1',10'-dihydrospiro[isindoline-1,3'-oxepino[3,4-b]indol]-3-one (3e)**

The resultant residue was purified by flash silicagel column chromatography (eluent: pure DCM) to afford **3e** as a white solid in 91% yield (55 mg) with 88% ee.

<sup>1</sup>H NMR (400 MHz, CD<sub>2</sub>Cl<sub>2</sub>) δ 8.03 (s, 1H), 7.81 – 7.73 (m, 2H), 7.70 (t, J=7.4, 1H), 7.57 (t, J=7.3, 1H), 7.46 – 7.24 (m, 13H), 7.21 (t, J=7.7, 1H), 7.10 (d, J=7.4, 2H), 7.01 (t, J=7.6, 1H), 6.84 (d, J=8.1, 1H), 6.69 (s, 1H), 6.27 (s, 1H) ppm.

<sup>13</sup>C NMR (101 MHz, CD<sub>2</sub>Cl<sub>2</sub>) δ 169.4, 149.9, 145.5, 143.8, 143.4, 141.9, 137.8, 135.7, 133.7, 131.9, 131.0, 130.2, 130.0, 129.1, 129.04, 128.96, 128.3, 128.2, 127.9, 126.8, 126.5, 123.97, 123.69, 123.3, 121.6, 121.6, 114.0, 112.6, 88.9, 83.7 ppm.

HRMS (ESI-TOF) m/z: [M + H]<sup>+</sup> Calcd for C<sub>37</sub>H<sub>26</sub>BrN<sub>2</sub>O<sub>2</sub> 611.1152; Found: 611.1159.

IR (KBr, cm<sup>-1</sup>) 3434, 3063, 2914, 1704, 1487, 1443, 1369, 1007, 750.

M.P. 291-293 °C. [α]<sub>D</sub><sup>20</sup> = +54 ° (c = 1.2, CH<sub>2</sub>Cl<sub>2</sub>).

HPLC (IE-3, hexane/isopropyl alcohol = 85/15, flow rate = 1 mL/min, λ = 254 nm), tR = 10.439 min (minor), 17.509 min (major).

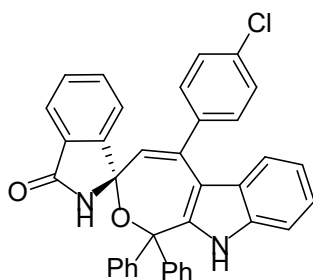

**(S)-5'-(4-chlorophenyl)-1',1'-diphenyl-1',10'-dihydrospiro[isindoline-1,3'-oxepino[3,4-b]indol]-3-one (3f)**

The resultant residue was purified by flash silicagel column chromatography (eluent: pure DCM) to afford **3f** as a white solid in 85% yield (48 mg) with 92% ee.

**<sup>1</sup>H NMR (400 MHz, CD<sub>2</sub>Cl<sub>2</sub>)** δ 7.87 (s, 1H), 7.70 – 7.57 (m, 3H), 7.53 – 7.45 (m, 1H), 7.35 – 7.10 (m, 14H), 7.09 – 7.03 (m, 2H), 6.96 – 6.88 (m, 1H), 6.75 (d, J=8.0, 1H), 6.60 (s, 1H), 6.18 (s, 1H) ppm.

**<sup>13</sup>C NMR (101 MHz, CD<sub>2</sub>Cl<sub>2</sub>)** δ 169.4, 149.9, 145.5, 143.7, 143.4, 141.9, 137.4, 135.7, 135.0, 133.7, 131.0, 130.2, 129.7, 129.1, 129.1, 129.0, 128.9, 128.3, 128.2, 127.9, 126.8, 126.6, 124.0, 123.7, 121.6, 114.1, 112.6, 88.9, 83.7 ppm.

**HRMS (ESI-TOF)** m/z: [M + H]<sup>+</sup> Calcd for C<sub>37</sub>H<sub>26</sub>ClN<sub>2</sub>O<sub>2</sub> 565.1677; Found: 565.1677.

**IR (KBr, cm<sup>-1</sup>)** 3583, 3424, 2920, 2845, 1697, 1444, 1369, 1006, 749.

**M.P.** 293-295 °C. [ $\alpha$ ]<sub>D</sub><sup>20</sup> = +59 ° (c = 1.2, CH<sub>2</sub>Cl<sub>2</sub>).

**HPLC** (IE-3, hexane/isopropyl alcohol = 85/15, flow rate = 1 mL/min, λ = 254 nm), tR = 9.176 min (minor), 15.132 min (major).

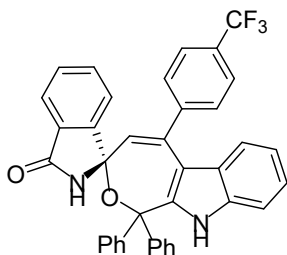

**(S)-1',1'-diphenyl-5'-(4-(trifluoromethyl)phenyl)-1',10'-dihydrospiro[isoxindoline-1,3'-oxepino[3,4-b]indol]-3-one (3g)**

The resultant residue was purified by flash silicagel column chromatography (eluent: pure DCM) to afford **3g** as a white solid in 84% yield (50 mg) with 87% ee.

**<sup>1</sup>H NMR (400 MHz, CD<sub>2</sub>Cl<sub>2</sub>)** δ 8.11 (s, 1H), 7.80 – 7.68 (m, 3H), 7.63 – 7.51 (m, 3H), 7.45 – 7.19 (m, 14H), 7.00 (t, J=7.6, 1H), 6.79 (d, J=8.1, 1H), 6.72 (s, 1H), 6.35 (s, 1H) ppm.

**<sup>13</sup>C NMR (101 MHz, CD<sub>2</sub>Cl<sub>2</sub>)** δ 169.4, 149.8, 145.5, 143.9, 143.3, 142.5, 141.8, 135.7, 133.7, 131.0, 130.3, 129.1, 129.04, 128.96, 128.7, 128.4, 128.3, 128.1, 127.9, 125.7 (q, J

= 3.8 Hz), 124.8 (q, J = 272.0 Hz), 124.0, 123.7, 121.7, 121.4, 113.8, 112.7, 88.9, 83.8 ppm.

<sup>19</sup>F NMR (376 MHz, CD<sub>2</sub>Cl<sub>2</sub>) δ -62.82 ppm.

HRMS (ESI-TOF) m/z: [M + H]<sup>+</sup> Calcd for C<sub>38</sub>H<sub>26</sub>F<sub>3</sub>N<sub>2</sub>O<sub>2</sub> 599.1941; Found: 599.1945.

IR (KBr, cm<sup>-1</sup>) 3433, 3247, 1708, 1614, 1534, 1469, 1322, 1163, 1015, 700.

M.P. 321-323 °C. [α]<sub>D</sub><sup>20</sup> = +29 ° (c = 1.0, CH<sub>2</sub>Cl<sub>2</sub>).

HPLC (IE-3, hexane/isopropyl alcohol = 80/20, flow rate = 0.8 mL/min, λ = 254 nm), tR = 6.809 min (minor), 11.521 min (major).

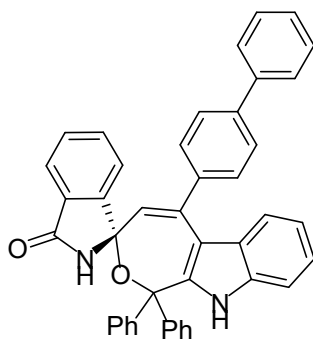

**(S)-5'--([1,1'-biphenyl]-4-yl)-1',1'-diphenyl-1',10'-dihydrospiro[isoinoline-1,3'-oxepino[3,4-b]indol]-3-one (3h)**

The resultant residue was purified by flash silicagel column chromatography (eluent: pure DCM) to afford **3h** as a white solid in 78% yield (47 mg) with 94% ee.

<sup>1</sup>H NMR (400 MHz, CD<sub>2</sub>Cl<sub>2</sub>) δ 8.14 (s, 1H), 7.79 (t, J=7.5, 2H), 7.75 – 7.69 (m, 1H), 7.65 – 7.58 (m, 3H), 7.59 – 7.52 (m, 2H), 7.49 – 7.42 (m, 4H), 7.40 – 7.26 (m, 12H), 7.24 – 7.18 (m, 1H), 7.01 (t, J=7.2, 1H), 6.95 (d, J=8.0, 1H), 6.72 (s, 1H), 6.35 (s, 1H) ppm.

<sup>13</sup>C NMR (101 MHz, CD<sub>2</sub>Cl<sub>2</sub>) δ 169.5, 150.2, 145.8, 143.7, 142.7, 142.0, 141.0, 138.0, 135.9, 133.7, 131.1, 130.2, 129.4, 129.08, 129.05, 129.03, 128.9, 128.32, 128.28, 128.11, 128.06, 127.5, 127.4, 126.9, 126.3, 124.03, 123.95, 123.8, 121.9, 121.6, 114.6, 112.7, 89.1, 83.8 ppm.

**HRMS (ESI-TOF)** m/z: [M + H]<sup>+</sup> Calcd for C<sub>43</sub>H<sub>31</sub>N<sub>2</sub>O<sub>2</sub> 607.2380; Found: 607.2385.

**IR (KBr, cm<sup>-1</sup>)** 3432, 3059, 3024, 2922, 1706, 1599, 1486, 1476, 1006.

**M.P.** 322-324°C. [α]<sub>D</sub><sup>20</sup> = +82 ° (c = 1.3, CH<sub>2</sub>Cl<sub>2</sub>).

**HPLC** (IE-3, hexane/isopropyl alcohol = 85/15, flow rate = 1 mL/min, λ = 254 nm), tR = 14.566 min (minor), 22.262 min (major).

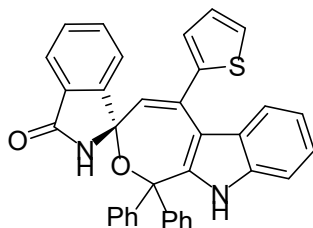

**(S)-1',1'-diphenyl-5'-(thiophen-2-yl)-1',10'-dihydrospiro[isoxepino[3,4-b]indol]-3-one (3i)**

The resultant residue was purified by flash silicagel column chromatography (eluent: pure DCM) to afford **3i** as a white solid in 92% yield (49 mg) with 90% ee.

**<sup>1</sup>H NMR (400 MHz, CD<sub>2</sub>Cl<sub>2</sub>)** δ 7.86 (s, 1H), 7.70 – 7.57 (m, 3H), 7.50 – 7.42 (m, 1H), 7.35 – 7.08 (m, 14H), 6.98 – 6.92 (m, 2H), 6.85 – 6.80 (m, 1H), 6.54 (s, 1H), 6.19 (s, 1H) ppm.

**<sup>13</sup>C NMR (101 MHz, CD<sub>2</sub>Cl<sub>2</sub>)** δ 169.3, 150.0, 145.7, 143.6, 143.0, 140.6, 137.9, 135.7, 133.6, 131.0, 130.1, 129.0, 128.9, 128.22, 128.19, 127.9, 127.6), 126.7, 126.1, 125.2, 124.5, 123.9, 123.7, 121.7, 121.5, 114.7, 112.5, 89.0, 83.6 ppm.

**HRMS (ESI-TOF)** m/z: [M + H]<sup>+</sup> Calcd for C<sub>35</sub>H<sub>25</sub>N<sub>2</sub>O<sub>2</sub>S 537.1631; Found: 537.1636.

**IR (KBr, cm<sup>-1</sup>)** 3428, 3254, 1696, 1610, 1535, 1433, 1016, 699.

**M.P.** 273-275 °C. [α]<sub>D</sub><sup>20</sup> = +48 ° (c = 1.0, CH<sub>2</sub>Cl<sub>2</sub>).

**HPLC** (IE-3, hexane/isopropyl alcohol = 85/15, flow rate = 1 mL/min, λ = 254 nm), tR = 11.517 min (minor), 18.430 min (major).

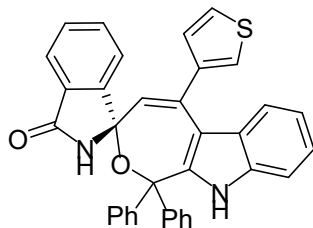

**(S)-1',1'-diphenyl-5'-(thiophen-3-yl)-1',10'-dihydrospiro[isindoline-1,3'-oxepino[3,4-b]indol]-3-one (3j)**

The resultant residue was purified by flash silicagel column chromatography (eluent: pure DCM) to afford **3j** as a white solid in 83% yield (45 mg) with 95% ee.

**<sup>1</sup>H NMR (400 MHz, CD<sub>2</sub>Cl<sub>2</sub>)** δ 7.87 (s, 1H), 7.71 – 7.57 (m, 3H), 7.47 (t, J=7.2, 1H), 7.37 – 7.11 (m, 13H), 7.05 (d, J=8.0, 1H), 6.97 (t, J=7.5, 1H), 6.91 – 6.85 (m, 2H), 6.48 (s, 1H), 6.21 (s, 1H) ppm.

**<sup>13</sup>C NMR (101 MHz, CD<sub>2</sub>Cl<sub>2</sub>)** δ 169.3, 149.8, 145.5, 143.5, 143.0, 141.9, 136.7, 135.7, 133.6, 131.0, 130.2, 129.0, 128.9, 128.3, 128.2, 127.92, 127.88, 127.4, 126.8, 126.5, 125.4, 124.0, 123.9, 123.7, 121.9, 121.5, 114.2, 112.6, 88.8, 83.5 ppm.

**HRMS (ESI-TOF)** m/z: [M + H]<sup>+</sup> Calcd for C<sub>35</sub>H<sub>25</sub>N<sub>2</sub>O<sub>2</sub>S 537.1631; Found: 537.1634.

**IR (KBr, cm<sup>-1</sup>)** 3428, 3256, 1687, 1618, 1531, 1322, 1005, 719.

**M.P.** 270-272 °C. [ $\alpha$ ]<sub>D</sub><sup>20</sup> = +65 ° (c = 1.3, CH<sub>2</sub>Cl<sub>2</sub>).

**HPLC** (IE-3, hexane/isopropyl alcohol = 80/20, flow rate = 0.8 mL/min, λ = 254 nm), tR = 8.738 min (minor), 13.767 min (major).

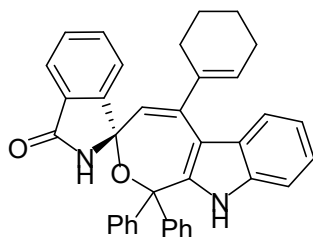

**(S)-5'-(cyclohex-1-en-1-yl)-1',1'-diphenyl-1',10'-dihydrospiro[isindoline-1,3'-oxepino[3,4-b]indol]-3-one (3k)**

The resultant residue was purified by flash silicagel column chromatography (eluent: pure DCM) to afford **3k** as a yellow solid in 76% yield (41 mg) with 83% ee.

**<sup>1</sup>H NMR (400 MHz, CD<sub>2</sub>Cl<sub>2</sub>)** δ 7.84 (s, 1H), 7.74 (d, J=7.8, 1H), 7.71 (d, J=7.5, 1H), 7.60 (t, J=7.6, 1H), 7.51 – 7.37 (m, 7H), 7.37 – 7.31 (m, 3H), 7.24 (t, J=7.5, 2H), 7.20 – 7.13 (m, 2H), 6.99 (t, J=7.6, 1H), 6.86 (s, 1H), 6.39 (s, 1H), 4.54 (s, 1H), 2.72 – 2.52 (m, 1H), 2.24 – 2.14 (m, 1H), 2.07 – 1.97 (m, 1H), 1.89 – 1.79 (m, 3H), 1.31 – 1.23 (m, 2H) ppm.

**<sup>13</sup>C NMR (101 MHz, CD<sub>2</sub>Cl<sub>2</sub>)** δ 167.5, 147.7, 144.6, 143.1, 142.0, 138.4, 135.1, 133.9, 132.4, 129.4, 129.2, 129.0, 128.7, 128.5, 128.3, 127.9, 127.2, 123.6, 123.3, 121.4, 120.8, 120.3, 113.9, 112.3, 103.2, 83.1, 72.8, 30.7, 26.8, 23.9, 20.5 ppm.

**HRMS (ESI-TOF)** m/z: [M + H]<sup>+</sup> Calcd for C<sub>37</sub>H<sub>31</sub>N<sub>2</sub>O<sub>2</sub> 535.2380; Found: 535.2382.

**IR (KBr, cm<sup>-1</sup>)** 3438, 2948, 1694, 1647, 1521, 1443, 1312, 1037, 758.

**M.P.** 291-293 °C. [α]<sub>D</sub><sup>20</sup> = +94 ° (c = 1.0, CH<sub>2</sub>Cl<sub>2</sub>).

**HPLC** (IE-3, hexane/isopropyl alcohol = 90/10, flow rate = 1 mL/min, λ = 254 nm), tR = 15.418 min (minor), 17.001 min (major).

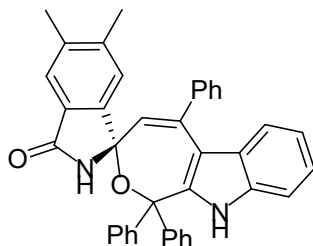

**(S)-5,6-dimethyl-1',1',5'-triphenyl-1',10'-dihydrospiro[isoindoline-1,3'-oxepino[3,4-b]indol]-3-one (3l)**

The resultant residue was purified by flash silicagel column chromatography (eluent: pure DCM) to afford **3l** as a white solid in 83% yield (46 mg) with 94% ee.

**<sup>1</sup>H NMR (400 MHz, CD<sub>2</sub>Cl<sub>2</sub>)** δ 7.99 (s, 1H), 7.60 – 7.15 (m, 18H), 6.96 (t, J = 7.5 Hz, 1H), 6.79 (d, J = 8.0 Hz, 1H), 6.58 (s, 1H), 6.26 (s, 1H), 2.41 (s, 4H), 2.38 (s, 3H) ppm.

$^{13}\text{C}$  NMR (101 MHz,  $\text{CD}_2\text{Cl}_2$ )  $\delta$  169.9, 148.0, 145.7, 143.7, 143.4, 142.7, 139.3, 139.0, 135.7, 129.1, 129.0, 128.7, 128.4, 128.1, 128.0, 126.8, 126.7, 124.7, 124.5, 124.5, 123.8, 121.7, 121.4, 114.6, 112.5, 88.8, 83.6, 21.0, 20.3 ppm.

HRMS (ESI-TOF)  $m/z$ :  $[\text{M} + \text{H}]^+$  Calcd for  $\text{C}_{39}\text{H}_{31}\text{N}_2\text{O}_2$  559.2380; Found: 559.2387.

IR (KBr,  $\text{cm}^{-1}$ ) 3395, 3052, 1434, 1367, 1232, 975, 744, 699.

M.P. 327-329 °C.  $[\alpha]^{20}_{\text{D}} = -38^\circ$  ( $c = 1.0$ ,  $\text{CH}_2\text{Cl}_2$ ).

HPLC (IE-3, hexane/isopropyl alcohol = 80/20, flow rate = 1 mL/min,  $\lambda = 254$  nm),  $t_{\text{R}} = 9.129$  min (minor), 14.977 min (major).

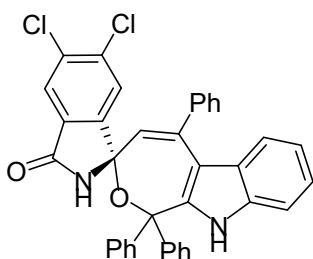

**(S)-5,6-dichloro-1',1',5'-triphenyl-1',10'-dihydrospiro[isoindoline-1,3'-oxepino[3,4-b]indol]-3-one (3m)**

The resultant residue was purified by flash silicagel column chromatography (eluent: pure DCM) to afford **3m** as a white solid in 81% yield (48 mg) with 95% ee.

$^1\text{H}$  NMR (400 MHz,  $\text{CD}_2\text{Cl}_2$ )  $\delta$  7.92 (s, 1H), 7.86 (s, 1H), 7.78 (s, 1H), 7.42 – 7.19 (m, 17H), 6.98 (t,  $J=7.4$ , 1H), 6.83 – 6.70 (m, 2H), 6.18 (s, 1H) ppm.

$^{13}\text{C}$  NMR (101 MHz,  $\text{CD}_2\text{Cl}_2$ )  $\delta$  167.2, 149.1, 145.2, 143.6, 143.3, 138.6, 137.8, 135.7, 134.8, 131.0, 129.4, 129.2, 129.1, 129.0, 128.8, 128.4, 128.3, 127.9, 126.7, 126.0, 125.9, 125.1, 124.0, 121.7, 121.6, 114.5, 112.6, 88.6, 84.0 ppm.

HRMS (ESI-TOF)  $m/z$ :  $[\text{M} + \text{H}]^+$  Calcd for  $\text{C}_{37}\text{H}_{25}\text{Cl}_2\text{N}_2\text{O}_2$  599.1288; Found: 599.1283.

IR (KBr,  $\text{cm}^{-1}$ ) 3386, 2925, 1719, 1601, 1450, 1270, 1165, 1110, 697.

M.P. 154-156 °C.  $[\alpha]^{20}_{\text{D}} = +36^\circ$  ( $c = 1.0$ ,  $\text{CH}_2\text{Cl}_2$ ).



**HPLC** (IE-3, hexane/isopropyl alcohol = 85/15, flow rate = 1 mL/min,  $\lambda$  = 254 nm), tR = 8.095 min (minor), 15.111 min (major).

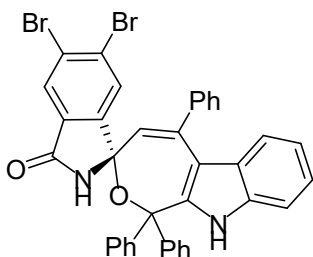

**(S)-5,6-dibromo-1',1',5'-triphenyl-1',10'-dihydrospiro[isoindoline-1,3'-oxepino[3,4-b]indol]-3-one (3n)**

The resultant residue was purified by flash silicagel column chromatography (eluent: pure DCM) to afford **3n** as a white solid in 88% yield (60 mg) with 95% ee.

**<sup>1</sup>H NMR (400 MHz, CD<sub>2</sub>Cl<sub>2</sub>)**  $\delta$  8.01 (s, 1H), 7.86 (s, 1H), 7.75 – 7.61 (m, 2H), 7.46 – 7.16 (m, 16H), 6.98 (t, J=7.6, 1H), 6.81 (d, J=8.1, 1H), 6.70 (s, 1H), 6.22 (s, 1H) ppm.

**<sup>13</sup>C NMR (101 MHz, CD<sub>2</sub>Cl<sub>2</sub>)**  $\delta$  168.4, 151.6, 145.4, 143.4, 138.7, 135.7, 133.5, 130.0, 129.3, 129.1, 129.03, 128.97, 128.8, 128.4, 128.33, 128.29, 128.0, 127.9, 127.2, 126.7, 125.53, 125.49, 123.9, 121.7, 121.5, 114.5, 112.6, 88.7, 83.9 ppm.

**HRMS (ESI-TOF)** m/z: [M + Na]<sup>+</sup> Calcd for C<sub>37</sub>H<sub>24</sub>Br<sub>2</sub>N<sub>2</sub>NaO<sub>2</sub> 711.0076; Found: 711.0066.

**IR (KBr, cm<sup>-1</sup>)** 3579, 3061, 2920, 2853, 1709, 1446, 1276, 1010.

**M.P.** 332-334 °C. [ $\alpha$ ]<sub>D</sub><sup>20</sup> = -10 ° (c = 1.0, CH<sub>2</sub>Cl<sub>2</sub>).

**HPLC** (IE-3, hexane/isopropyl alcohol = 85/15, flow rate = 1 mL/min,  $\lambda$  = 254 nm), tR = 7.712 min (minor), 11.678 min (major).

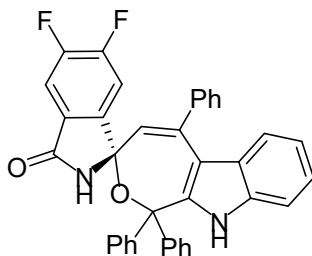

**(S)-5,6-difluoro-1',1',5'-triphenyl-1',10'-dihydrospiro[isoinoline-1,3'-oxepino[3,4-b]indol]-3-one (3o)**

The resultant residue was purified by flash silicagel column chromatography (eluent: pure DCM) to afford **3o** as a white solid in 79% yield (45 mg) with 92% ee.

<sup>1</sup>H NMR (400 MHz, CD<sub>2</sub>Cl<sub>2</sub>) δ 7.94 (s, 1H), 7.58 (t, J=7.8, 1H), 7.54 – 7.47 (m, 1H), 7.43 – 7.17 (m, 17H), 6.97 (t, J=7.6, 1H), 6.82 – 6.74 (m, 2H), 6.17 (s, 1H) ppm.

<sup>13</sup>C NMR (101 MHz, CD<sub>2</sub>Cl<sub>2</sub>) δ 167.5, 154.5 (d, J = 255.3 Hz), 154.3 (d, J = 254.8 Hz), 145.3, 143.6, 143.3, 138.7, 135.7, 129.4, 129.2, 129.1, 129.0, 128.8, 128.4, 128.3, 127.9, 126.7, 125.2, 124.0, 121.7, 121.5, 114.5, 113.1 (d, J = 15.2 Hz), 112.9 (d, J = 14.1 Hz), 112.6, 88.5, 83.9 ppm.

<sup>19</sup>F NMR (376 MHz, CD<sub>2</sub>Cl<sub>2</sub>) δ -129.57 (d, J = 18.9 Hz), -135.43 (d, J = 18.9 Hz) ppm.

HRMS (ESI-TOF) m/z: [M + Na]<sup>+</sup> Calcd for C<sub>37</sub>H<sub>24</sub>F<sub>2</sub>N<sub>2</sub>NaO<sub>2</sub> 589.1698; Found: 589.1704.

IR (KBr, cm<sup>-1</sup>) 3589, 3051, 2920, 1695, 1444, 1371, 1009, 697.

M.P. 298-300 °C. [α]<sup>20</sup><sub>D</sub> = +20 ° (c = 1.1, CH<sub>2</sub>Cl<sub>2</sub>).

HPLC (IE-3, hexane/isopropyl alcohol = 85/15, flow rate = 1 mL/min, λ = 254 nm), tR = 4.858 min (minor), 8.040 min (major).

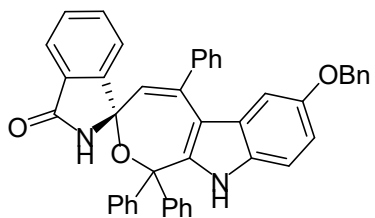

**(S)-7'-(benzyloxy)-1',1',5'-triphenyl-1',10'-dihydrospiro[isindoline-1,3'-oxepino[3,4-b]indol]-3-one (3p)**

The resultant residue was purified by flash silicagel column chromatography (eluent: pure DCM) to afford **3p** as a white solid in 90% yield (57 mg) with 90% ee.

**<sup>1</sup>H NMR (400 MHz, CD<sub>2</sub>Cl<sub>2</sub>)** δ 8.03 (s, 1H), 7.81 – 7.73 (m, 2H), 7.73 – 7.66 (m, 1H), 7.61 – 7.54 (m, 1H), 7.45 – 7.39 (m, 2H), 7.37 – 7.15 (m, 19H), 6.95 – 6.86 (m, 1H), 6.71 (s, 1H), 6.28 (d, J=2.3, 1H), 6.24 (s, 1H), 4.75 (s, 2H) ppm.

**<sup>13</sup>C NMR (101 MHz, CD<sub>2</sub>Cl<sub>2</sub>)** δ 169.5, 154.4, 150.2, 145.8, 144.1, 143.7, 143.2, 138.7, 138.0, 133.7, 131.1, 131.0, 130.2, 129.3, 129.05, 129.00, 128.99, 128.8, 128.5, 128.29, 128.26, 128.2, 128.1, 128.0, 127.4, 125.9, 124.0, 123.8, 115.1, 114.4, 113.4, 104.6, 89.1, 83.8, 71.0 ppm.

**HRMS (ESI-TOF)** m/z: [M + H]<sup>+</sup> Calcd for C<sub>44</sub>H<sub>33</sub>N<sub>2</sub>O<sub>3</sub> 637.2486; Found: 637.2485.

**IR (KBr, cm<sup>-1</sup>)** 3413, 1701, 1444, 1369, 1275, 1183, 1012, 729.

**M.P.** 280-282 °C. [ $\alpha$ ]<sub>D</sub><sup>20</sup> = +33 ° (c = 1.0, CH<sub>2</sub>Cl<sub>2</sub>).

**HPLC** (IE-3, hexane/isopropyl alcohol = 90/10, flow rate = 1 mL/min, λ = 254 nm), tR = 11.925 min (minor), 16.210 min (major).

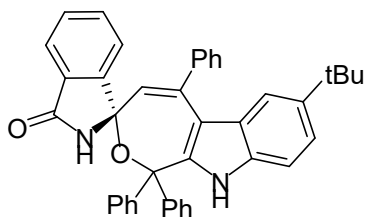

**(S)-7'-(tert-butyl)-1',1',5'-triphenyl-1',10'-dihydrospiro[isindoline-1,3'-oxepino[3,4-b]indol]-3-one (3q)**

The resultant residue was purified by flash silicagel column chromatography (eluent: pure DCM) to afford **3q** as a white solid in 83% yield (49 mg) with 91% ee.

**<sup>1</sup>H NMR (400 MHz, CD<sub>2</sub>Cl<sub>2</sub>)** δ 7.88 (s, 1H), 7.81 – 7.75 (m, 2H), 7.70 (t, J=7.5, 1H), 7.57 (t, J=7.4, 1H), 7.45 – 7.19 (m, 17H), 6.75 (s, 1H), 6.72 (s, 1H), 6.26 (s, 1H), 1.13 (s, 9H) ppm.

**<sup>13</sup>C NMR (101 MHz, CD<sub>2</sub>Cl<sub>2</sub>)** δ 169.5, 150.2, 145.8, 144.4, 143.7, 143.6, 143.3, 139.0, 133.9, 133.6, 131.1, 130.1, 129.1, 129.03, 129.00, 128.6, 128.24, 128.18, 128.1, 126.6, 125.7, 124.0, 123.8, 122.2, 117.8, 114.8, 111.9, 89.1, 83.8, 34.9, 31.8 ppm.

**HRMS (ESI-TOF)** m/z: [M + H]<sup>+</sup> Calcd for C<sub>41</sub>H<sub>35</sub>N<sub>2</sub>O<sub>2</sub> 587.2693; Found: 587.2696.

**IR (KBr, cm<sup>-1</sup>)** 3436, 2958, 2922, 2844, 1702, 1446, 1365, 1276, 1014.

**M.P.** 267-269 °C. [α]<sub>D</sub><sup>20</sup> = -57 ° (c = 1.2, CH<sub>2</sub>Cl<sub>2</sub>).

**HPLC** (IE-3, hexane/isopropyl alcohol = 85/15, flow rate = 1 mL/min, λ = 254 nm), tR = 7.587 min (minor), 11.761 min (major).

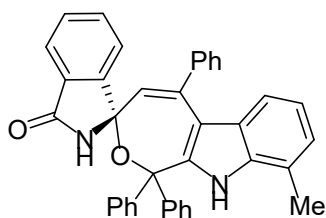

**(S)-9'-methyl-1',1',5'-triphenyl-1',10'-dihydrospiro[isindoline-1,3'-oxepino[3,4-b]indol]-3-one (3r)**

The resultant residue was purified by flash silicagel column chromatography (eluent: pure DCM) to afford **3r** as a white solid in 88% yield (48 mg) with 92% ee.

**<sup>1</sup>H NMR (400 MHz, CD<sub>2</sub>Cl<sub>2</sub>)** δ 7.83 – 7.76 (m, 2H), 7.74 – 7.66 (m, 2H), 7.58 (t, J=7.5, 1H), 7.52 – 7.46 (m, 2H), 7.43 – 7.21 (m, 13H), 7.04 (d, J=7.1, 1H), 6.92 (t, J=7.6, 1H), 6.74 (s, 1H), 6.68 (d, J=8.1, 1H), 6.31 (s, 1H), 2.36 (s, 3H) ppm.

**<sup>13</sup>C NMR (101 MHz, CD<sub>2</sub>Cl<sub>2</sub>)** δ 169.4, 150.2, 145.7, 143.5, 143.3, 143.1, 139.0, 135.3, 133.6, 131.1, 130.2, 129.18, 129.16, 129.04, 128.99, 128.7, 128.5, 128.30, 128.25, 128.1, 126.5, 126.4, 124.4, 124.0, 123.8, 121.79, 121.75, 119.4, 115.3, 89.1, 83.8, 16.6 ppm.

**HRMS (ESI-TOF)** m/z: [M + H]<sup>+</sup> Calcd for C<sub>38</sub>H<sub>29</sub>N<sub>2</sub>O<sub>2</sub> 545.2224; Found: 545.2226.

**IR (KBr, cm<sup>-1</sup>)** 3419, 3057, 1697, 1614, 1467, 1445, 1368, 981.

**M.P.** 261-263 °C. [ $\alpha$ ]<sub>D</sub><sup>20</sup> = +45 ° (c = 1.0, CH<sub>2</sub>Cl<sub>2</sub>).

**HPLC** (IE-3, hexane/isopropyl alcohol = 85/15, flow rate = 1 mL/min,  $\lambda$  = 254 nm), tR = 11.883 min (minor), 15.785 min (major).

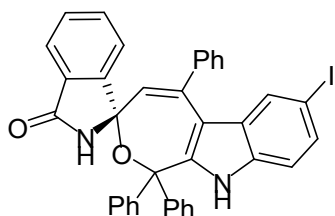

**(S)-7'-iodo-1',1',5'-triphenyl-1,10'-dihydrospiro[isoindoline-1,3'-oxepino[3,4-b]indol]-3-one (3s)**

The resultant residue was purified by flash silicagel column chromatography (eluent: pure DCM) to afford **3s** as a white solid in 86% yield (56 mg) using with 91% ee.

**<sup>1</sup>H NMR (400 MHz, CD<sub>2</sub>Cl<sub>2</sub>)**  $\delta$  8.22 (s, 1H), 7.80 – 7.67 (m, 3H), 7.61 – 7.55 (m, 1H), 7.48 – 7.24 (m, 14H), 7.22 – 7.11 (m, 4H), 6.64 (s, 1H), 6.29 (s, 1H) ppm.

**<sup>13</sup>C NMR (101 MHz, CD<sub>2</sub>Cl<sub>2</sub>)**  $\delta$  169.5, 149.9, 145.3, 144.4, 143.2, 142.4, 138.4, 134.8, 133.7, 132.3, 130.9, 130.4, 130.2, 129.4, 129.2, 129.1, 129.0, 128.9, 128.8, 128.4, 128.29, 128.26, 127.8, 126.7, 123.9, 123.7, 114.6, 113.8, 89.0, 85.1, 83.5 ppm.

**HRMS (ESI-TOF)** m/z: [M + H]<sup>+</sup> Calcd for C<sub>37</sub>H<sub>26</sub>IN<sub>2</sub>O<sub>2</sub> 657.1033; Found: 657.1033.

**IR (KBr, cm<sup>-1</sup>)** 3432, 3278, 3057, 1704, 1448, 1377, 1011, 755, 638.

**M.P.** 297-299 °C. [ $\alpha$ ]<sub>D</sub><sup>20</sup> = +43 ° (c = 1.0, CH<sub>2</sub>Cl<sub>2</sub>).

**HPLC** (IE-3, hexane/isopropyl alcohol = 85/15, flow rate = 1 mL/min,  $\lambda$  = 254 nm), tR = 7.893 min (minor), 14.552 min (major).

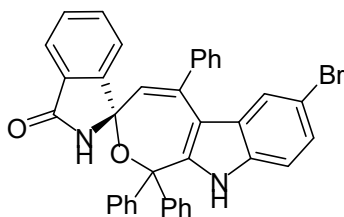

**(S)-7'-bromo-1',1',5'-triphenyl-1',10'-dihydrospiro[isoindoline-1,3'-oxepino[3,4-b]indol]-3-one (3t)**

The resultant residue was purified by flash silicagel column chromatography (eluent: pure DCM) to afford **3t** as a white solid in 91% yield (55 mg) with 86% ee.

**<sup>1</sup>H NMR (400 MHz, CD<sub>2</sub>Cl<sub>2</sub>)** δ 8.00 (s, 1H), 7.69 (d, J=7.5, 1H), 7.66 – 7.57 (m, 2H), 7.52 – 7.44 (m, 1H), 7.34 – 7.15 (m, 15H), 7.13 – 7.07 (m, 2H), 6.83 (d, J=1.7, 1H), 6.55 (s, 1H), 6.19 (s, 1H) ppm.

**<sup>13</sup>C NMR (101 MHz, CD<sub>2</sub>Cl<sub>2</sub>)** δ 169.5, 150.0, 145.3, 144.8, 143.3, 142.4, 138.5, 134.4, 133.7, 131.0, 130.2, 129.5, 129.2, 129.1, 129.0, 128.9, 128.4, 128.38, 128.35, 128.0, 127.0, 126.9, 124.1, 124.0, 123.7, 114.8, 114.2, 89.1, 83.7 ppm.

**HRMS (ESI-TOF)** m/z: [M + H]<sup>+</sup> Calcd for C<sub>37</sub>H<sub>26</sub>BrN<sub>2</sub>O<sub>2</sub> 611.1152; Found: 611.1151.

**IR (KBr, cm<sup>-1</sup>)** 3058, 1701, 1657, 1596, 1446, 1277, 759, 700.

**M.P.** 281-283 °C. [ $\alpha$ ]<sub>D</sub><sup>20</sup> = +32° (c = 1.0, CH<sub>2</sub>Cl<sub>2</sub>).

**HPLC** (IE-3, hexane/isopropyl alcohol = 85/15, flow rate = 1 mL/min, λ = 254 nm), tR = 6.357 min (minor), 10.500 min (major).

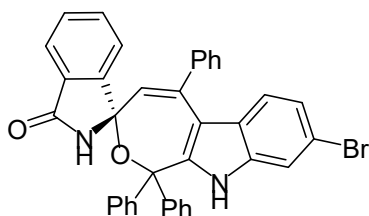

**(S)-8'-bromo-1',1',5'-triphenyl-1',10'-dihydrospiro[isoindoline-1,3'-oxepino[3,4-b]indol]-3-one (3u)**

The resultant residue was purified by flash silicagel column chromatography (eluent: pure DCM) to afford **3u** as a white solid in 83% yield (50 mg) with 91% ee.

**<sup>1</sup>H NMR (400 MHz, CD<sub>2</sub>Cl<sub>2</sub>)** δ 8.54 (s, 1H), 7.79 – 7.68 (m, 3H), 7.59 (t, J=7.3, 1H), 7.50 (s, 1H), 7.44 – 7.37 (m, 2H), 7.36 – 7.24 (m, 11H), 7.23 – 7.15 (m, 2H), 7.04 (d, J=8.6, 1H), 6.70 – 6.62 (m, 2H), 6.29 (s, 1H) ppm.

**<sup>13</sup>C NMR (101 MHz, CD<sub>2</sub>Cl<sub>2</sub>)** δ 169.6, 150.0, 145.4, 144.3, 143.3, 142.6, 138.7, 136.4, 133.8, 130.9, 130.2, 129.3, 129.2, 129.0, 128.9, 128.8, 128.4, 128.3, 128.2, 127.9, 126.6, 125.5, 124.8, 124.0, 123.7, 122.9, 117.2, 115.3, 114.7, 89.1, 83.6 ppm.

**HRMS (ESI-TOF)** m/z: [M + H]<sup>+</sup> Calcd for C<sub>37</sub>H<sub>26</sub>BrN<sub>2</sub>O<sub>2</sub> 611.1152; Found: 611.1158.

**IR (KBr, cm<sup>-1</sup>)** 3428, 3268, 3058, 1702, 1654, 1491, 1376, 1013, 700.

**M.P.** 279-281 °C. [ $\alpha$ ]<sub>D</sub><sup>20</sup> = +43 ° (c = 1.0, CH<sub>2</sub>Cl<sub>2</sub>).

**HPLC** (IE-3, hexane/isopropyl alcohol = 85/15, flow rate = 1 mL/min, λ = 254 nm), tR = 9.293 min (minor), 10.766 min (major).

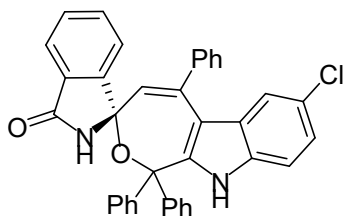

**(S)-7'-chloro-1',1',5'-triphenyl-1',10'-dihydrospiro[isoindoline-1,3'-oxepino[3,4-b]indol]-3-one (3v)**

The resultant residue was purified by flash silicagel column chromatography (eluent: pure DCM) to afford **3v** as a white solid in 84% yield (47 mg) with 83% ee.

**<sup>1</sup>H NMR (400 MHz, CD<sub>2</sub>Cl<sub>2</sub>)** δ 8.03 (s, 1H), 7.71 – 7.57 (m, 3H), 7.51 – 7.45 (m, 1H), 7.36 – 7.16 (m, 14H), 7.14 – 7.02 (m, 3H), 6.67 (d, J=2.0, 1H), 6.55 (s, 1H), 6.18 (s, 1H) ppm.

**<sup>13</sup>C NMR (101 MHz, CD<sub>2</sub>Cl<sub>2</sub>)** δ 169.5, 150.1, 145.4, 145.0, 143.4, 142.5, 138.6, 134.2, 133.7, 131.0, 130.2, 129.5, 129.2, 129.1, 129.0, 128.9, 128.4, 128.4, 128.3, 128.0, 127.8, 127.2, 126.9, 124.3, 124.0, 123.8, 121.0, 114.4, 113.9, 89.1, 83.7 ppm.

**HRMS (ESI-TOF)** m/z: [M + H]<sup>+</sup> Calcd for C<sub>37</sub>H<sub>26</sub>ClN<sub>2</sub>O<sub>2</sub> 565.1677; Found: 565.1679.

**IR (KBr, cm<sup>-1</sup>)** 3434, 3292, 3060, 2926, 1705, 1613, 1466, 1377, 1013, 699.

**M.P.** 286-288 °C. [α]<sub>D</sub><sup>20</sup> = +152 ° (c = 1.1, CH<sub>2</sub>Cl<sub>2</sub>).

**HPLC** (IE-3, hexane/isopropyl alcohol = 75/25, flow rate = 0.8 mL/min, λ = 254 nm), tR = 5.540 min (minor), 8.316 min (major).

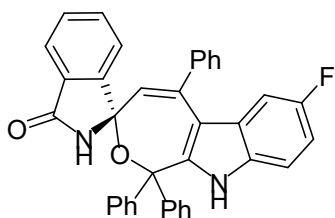

**(S)-7'-fluoro-1',1',5'-triphenyl-1',10'-dihydrospiro[isoindoline-1,3'-oxepino[3,4-b]indol]-3-one (3w)**

The resultant residue was purified by flash silicagel column chromatography (eluent: pure DCM) to afford **3w** as a white solid in 82% yield (45 mg) with 95% ee.

**<sup>1</sup>H NMR (400 MHz, CD<sub>2</sub>Cl<sub>2</sub>)** δ 8.32 (d, J=13.3, 1H), 7.81 – 7.67 (m, 3H), 7.58 (t, J=7.3, 1H), 7.45 – 7.18 (m, 16H), 6.93 (t, J=9.0, 1H), 6.67 (s, 1H), 6.50 – 6.37 (m, 1H), 6.27 (s, 1H) ppm.

**<sup>13</sup>C NMR (101 MHz, CD<sub>2</sub>Cl<sub>2</sub>)** δ 169.6, 158.7 (d, J = 236.5 Hz), 150.1, 145.5, 145.4, 143.5, 142.8, 138.5, 133.8, 132.4, 131.0, 130.2, 129.4, 129.2, 129.04, 129.00, 128.9, 128.42, 128.38, 128.3, 128.0, 127.2 (d, J = 10.4 Hz), 126.4, 124.1, 123.8, 114.8 (d, J = 4.7 Hz), 113.6 (d, J = 9.8 Hz), 112.6, 112.4, 106.5, 106.3, 89.2, 83.8 ppm.

**<sup>19</sup>F NMR (376 MHz, CD<sub>2</sub>Cl<sub>2</sub>)** δ -122.40 ppm.

**HRMS (ESI-TOF)** m/z: [M + H]<sup>+</sup> Calcd for C<sub>37</sub>H<sub>26</sub>FN<sub>2</sub>O<sub>2</sub> 549.1973; Found: 549.1974.



**IR (KBr,  $\text{cm}^{-1}$ )** 3430, 3261, 3059, 2925, 1705, 1598, 1484, 1313, 1175, 1014.

**M.P.** 290-292 °C.  $[\alpha]^{20}_{\text{D}} = +33^{\circ}$  ( $c = 1.2$ ,  $\text{CH}_2\text{Cl}_2$ ).

**HPLC** (IE-3, hexane/isopropyl alcohol = 80/20, flow rate = 0.8 mL/min,  $\lambda = 254$  nm),  $t_{\text{R}} = 10.527$  min (minor), 13.249 min (major).

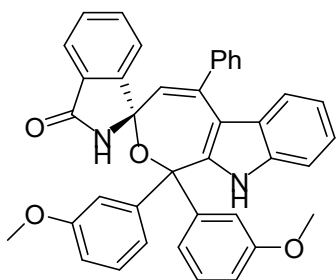

**(S)-1',1'-bis(3-methoxyphenyl)-5'-phenyl-1',10'-dihydrospiro[isoxindoline-1,3'-oxepino[3,4-b]indol]-3-one (3x)**

The resultant residue was purified by flash silicagel column chromatography (eluent: pure DCM) to afford **3x** as a white solid in 83% yield (42 mg) with 85% ee.

**$^1\text{H}$  NMR (400 MHz,  $\text{CD}_2\text{Cl}_2$ )**  $\delta$  8.09 (s, 1H), 7.82 – 7.66 (m, 3H), 7.57 (t,  $J=7.3$ , 1H), 7.40 – 7.15 (m, 9H), 7.05 (s, 1H), 6.99 – 6.79 (m, 7H), 6.70 (s, 1H), 6.29 (s, 1H), 3.76 (s, 3H), 3.70 (s, 3H) ppm.

**$^{13}\text{C}$  NMR (101 MHz,  $\text{CD}_2\text{Cl}_2$ )**  $\delta$  169.4, 160.2, 159.9, 150.0, 147.3, 145.0, 143.2, 143.1, 139.0, 135.7, 133.6, 131.0, 130.1, 130.0, 129.2, 129.0, 128.7, 128.5, 126.7, 126.2, 124.0, 123.8, 123.6, 121.7, 121.4, 121.1, 120.4, 115.3, 114.6, 114.6, 113.7, 113.2, 112.6, 89.0, 83.5, 55.7 ppm.

**HRMS (ESI-TOF)**  $m/z$ :  $[\text{M} + \text{H}]^+$  Calcd for  $\text{C}_{39}\text{H}_{31}\text{N}_2\text{O}_4$  591.2278; found: 591.2282.

**IR (KBr,  $\text{cm}^{-1}$ )** 3427, 3059, 2948, 1696, 1527, 1425, 1216, 992, 688.

**M.P.** 250-252 °C.  $[\alpha]^{20}_{\text{D}} = +32^{\circ}$  ( $c = 1.0$ ,  $\text{CH}_2\text{Cl}_2$ ).

**HPLC** (IE-3, hexane/isopropyl alcohol = 80/20, flow rate = 1 mL/min,  $\lambda = 254$  nm),  $t_{\text{R}} = 15.352$  min (minor), 21.935 min (major).

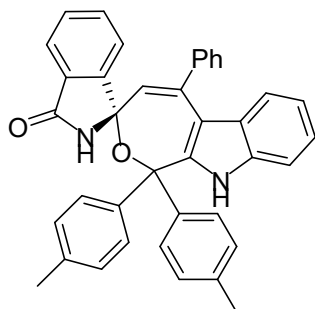

**(S)-5'-phenyl-1',1'-di-p-tolyl-1',10'-dihydrospiro[isoidoline-1,3'-oxepino[3,4-b]indol]-3-one (3y)**

The resultant residue was purified by flash silicagel column chromatography (eluent: pure DCM) to afford **3y** as a white solid in 92% yield (51 mg) with 89% ee.

**<sup>1</sup>H NMR (400 MHz, CD<sub>2</sub>Cl<sub>2</sub>)** δ 8.11 (s, 1H), 7.78 (d, J=7.5, 1H), 7.76 – 7.67 (m, 2H), 7.61 – 7.54 (m, 1H), 7.38 – 7.22 (m, 8H), 7.21 – 7.06 (m, 7H), 6.97 (t, J=7.6, 1H), 6.80 (d, J=8.1, 1H), 6.71 (s, 1H), 6.27 (s, 1H), 2.33 (s, 6H) ppm.

**<sup>13</sup>C NMR (101 MHz, CD<sub>2</sub>Cl<sub>2</sub>)** δ 169.5, 150.3, 143.8, 143.1, 142.8, 141.0, 139.3, 139.0, 138.1, 135.7, 133.6, 131.1, 130.1, 129.6, 129.2, 128.9, 128.9, 128.8, 128.5, 127.9, 126.9, 126.3, 123.9, 123.8, 121.7, 121.4, 114.4, 112.5, 89.1, 83.7, 21.4, 21.3 ppm.

**HRMS (ESI-TOF)** m/z: [M + H]<sup>+</sup> Calcd for C<sub>39</sub>H<sub>31</sub>N<sub>2</sub>O<sub>2</sub> 559.2380; Found: 559.2382.

**IR (KBr, cm<sup>-1</sup>)** 3581, 3422, 3059, 2924, 2851, 1712, 1472, 1216, 750.

**M.P.** 307-309 °C. [ $\alpha$ ]<sub>D</sub><sup>20</sup> = +66° (c = 1.0, CH<sub>2</sub>Cl<sub>2</sub>).

**HPLC** (IE-3, hexane/isopropyl alcohol = 80/20, flow rate = 0.8 mL/min, λ = 254 nm), tR = 9.745 min (minor), 14.606 min (major).

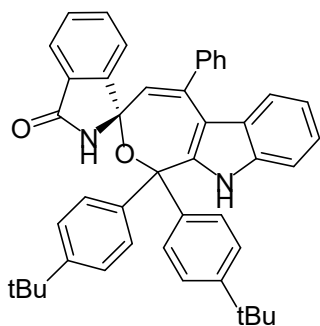

**(S)-1',1'-bis(4-(tert-butyl)phenyl)-5'-phenyl-1',10'-dihydrospiro[isoindoline-1,3'-oxepino[3,4-b]indol]-3-one (3z)**

The resultant residue was purified by flash silicagel column chromatography (eluent: pure DCM) to afford **3z** as a white solid in 85% yield (55 mg) with 96% ee.

**<sup>1</sup>H NMR (400 MHz, CD<sub>2</sub>Cl<sub>2</sub>)** δ 8.51 (s, 1H), 7.81 (d, J=7.5, 1H), 7.77 (d, J=7.6, 1H), 7.70 (t, J=7.3, 1H), 7.58 (t, J=7.4, 1H), 7.36 – 7.21 (m, 8H), 7.20 – 7.03 (m, 7H), 6.94 (t, J=7.5, 1H), 6.79 (d, J=8.1, 1H), 6.72 (s, 1H), 6.24 (s, 1H), 1.26 (s, 9H), 1.22 (s, 9H) ppm.

**<sup>13</sup>C NMR (101 MHz, CD<sub>2</sub>Cl<sub>2</sub>)** δ 169.7, 152.1, 151.1, 150.3, 144.3, 143.2, 142.6, 140.8, 139.5, 135.7, 133.7, 130.9, 130.4, 130.1, 129.0, 128.6, 128.5, 127.6, 126.9, 126.1, 125.81, 125.75, 124.9, 123.9, 123.8, 123.6, 121.6, 121.3, 114.5, 112.6, 89.0, 83.6, 35.0, 34.9, 31.6, 31.5 ppm.

**HRMS (ESI-TOF)** m/z: [M + H]<sup>+</sup> Calcd for C<sub>45</sub>H<sub>43</sub>N<sub>2</sub>O<sub>2</sub> 643.3319; Found: 643.3328.

**IR (KBr, cm<sup>-1</sup>)** 3585, 3420, 2928, 1698, 1361, 1005, 987, 737.

**M.P.** 337-339 °C. [ $\alpha$ ]<sub>D</sub><sup>20</sup> = +103° (c = 1.4, CH<sub>2</sub>Cl<sub>2</sub>).

**HPLC** (IE-3, hexane/isopropyl alcohol = 90/10, flow rate = 1 mL/min, λ = 254 nm), tR = 12.561 min (minor), 16.016 min (major).

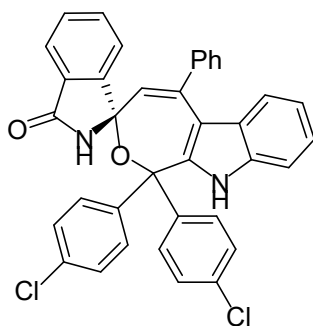

**(S)-1',1'-bis(4-chlorophenyl)-5'-phenyl-1',10'-dihydrospiro[isoindoline-1,3'-oxepino[3,4-b]indol]-3-one (3aa)**

The resultant residue was purified by flash silicagel column chromatography (eluent: pure DCM) to afford **3aa** as a white solid in 88% yield (53 mg) with 90% ee.

**<sup>1</sup>H NMR (400 MHz, CD<sub>2</sub>Cl<sub>2</sub>)** δ 8.00 (s, 1H), 7.69 (d, J=7.5, 1H), 7.65 – 7.56 (m, 2H), 7.53 – 7.45 (m, 1H), 7.32 – 7.15 (m, 10H), 7.15 – 7.03 (m, 5H), 6.94 – 6.85 (m, 1H), 6.71 (d, J=8.1, 1H), 6.56 (s, 1H), 6.21 (s, 1H) ppm.

**<sup>13</sup>C NMR (101 MHz, CD<sub>2</sub>Cl<sub>2</sub>)** δ 169.6, 149.8, 144.1, 143.2, 142.3, 141.9, 138.6, 135.9, 135.2, 134.3, 133.8, 130.9, 130.4, 130.3, 129.9, 129.4, 129.3, 129.2, 128.8, 128.5, 128.4, 126.6, 126.0, 124.2, 124.1, 123.6, 121.8, 121.7, 117.2, 114.8, 112.6, 89.0, 82.9 ppm.

**HRMS (ESI-TOF)** m/z: [M + H]<sup>+</sup> Calcd for C<sub>37</sub>H<sub>25</sub>Cl<sub>2</sub>N<sub>2</sub>O<sub>2</sub> 599.1288; Found: 599.1288.

**IR (KBr, cm<sup>-1</sup>)** 3429, 3251, 3059, 1703, 1589, 1489, 1006, 831, 695.

**M.P.** 291-293 °C. [ $\alpha$ ]<sub>D</sub><sup>20</sup> = +49° (c = 1.0, CH<sub>2</sub>Cl<sub>2</sub>).

**HPLC** (IE-3, hexane/isopropyl alcohol = 85/15, flow rate = 1 mL/min, λ = 254 nm), tR = 8.073 min (minor), 10.711 min (major).

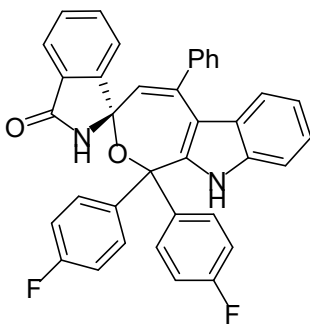

**(S)-1',1'-bis(4-fluorophenyl)-5'-phenyl-1',10'-dihydrospiro[isoindoline-1,3'-oxepino[3,4-b]indol]-3-one (3ab)**

The resultant residue was purified by flash silicagel column chromatography (eluent: pure DCM) to afford **3ab** as a white solid in 80% yield (45 mg) with 91% ee.

**<sup>1</sup>H NMR (400 MHz, Acetone)** δ 8.06 (s, 1H), 7.78 (d, J=7.5, 1H), 7.74 – 7.68 (m, 2H), 7.61 – 7.55 (m, 1H), 7.45 – 7.16 (m, 11H), 7.06 – 6.92 (m, 5H), 6.81 (d, J=8.0, 1H), 6.67 (s, 1H), 6.30 (s, 1H) ppm.

**<sup>13</sup>C NMR (101 MHz, Acetone)** δ 169.5, 163.3 (d, J = 247.9 Hz), 163.0 (d, J = 246.4 Hz), 150.0, 143.2, 143.0, 141.5, 139.5, 138.8, 135.8, 133.8, 131.0 (d, J = 8.2 Hz), 130.3, 129.7 (d, J = 8.1 Hz), 129.3, 128.8, 128.4, 126.8, 126.2, 124.2, 124.1, 123.6, 121.8, 121.7, 115.9 (d, J = 21.7 Hz), 115.2 (d, J = 21.7 Hz), 112.6, 89.1, 83.0 ppm.

**<sup>19</sup>F NMR (376 MHz, Acetone)** δ -114.06 (s), -115.07 (s) ppm.

**HRMS (ESI-TOF)** m/z: [M + Na]<sup>+</sup> Calcd for C<sub>37</sub>H<sub>24</sub>F<sub>2</sub>N<sub>2</sub>NaO<sub>2</sub> 589.1698; Found: 589.1698.

**IR (KBr, cm<sup>-1</sup>)** 3434, 3259, 3153, 1694, 1598, 1501, 1223, 832, 702.

**M.P.** 301-303 °C. [ $\alpha$ ]<sub>D</sub><sup>20</sup> = +131 ° (c = 1.0, CH<sub>2</sub>Cl<sub>2</sub>).

**HPLC** (IE-3, hexane/isopropyl alcohol = 80/20, flow rate = 0.8 mL/min, λ = 254 nm), tR = 7.659 min (minor), 10.645 min (major).

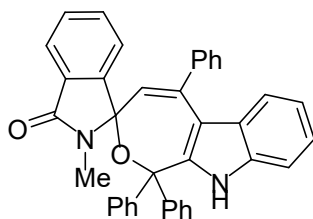

**2-methyl-1',1',5'-triphenyl-1',10'-dihydrospiro[isoindoline-1,3'-oxepino[3,4-b]indol]-3-one (5)**

The resultant residue was purified by flash silicagel column chromatography (eluent: petroleum ether/DCM = 1:2, v/v) to afford **7** as a white solid in 52% yield (28 mg).

**<sup>1</sup>H NMR (400 MHz, CD<sub>2</sub>Cl<sub>2</sub>)** δ 7.85 (s, 1H), 7.71 (d, J=7.4, 1H), 7.47 – 7.29 (m, 15H), 7.24 – 7.16 (m, 3H), 7.13 (t, J=7.6, 1H), 6.96 (t, J=7.6, 1H), 6.72 (d, J=8.1, 1H), 6.27 (d, J=7.8, 1H), 5.95 (s, 1H), 2.95 (s, 3H) ppm.

**<sup>13</sup>C NMR (101 MHz, CD<sub>2</sub>Cl<sub>2</sub>)** δ 167.5, 149.4, 145.4, 144.8, 143.9, 142.9, 140.0, 135.3, 132.9, 131.5, 129.4, 129.2, 129.0, 128.9, 128.9, 128.8, 128.7, 128.5, 128.5, 127.1, 125.2, 123.8, 123.3, 123.1, 121.9, 121.3, 115.4, 112.5, 94.9, 83.5, 26.2 ppm.

**HRMS (ESI-TOF)** m/z:  $[M + H]^+$  Calcd for  $C_{38}H_{29}N_2O_2$  545.2224; Found: 545.2227.

**IR (KBr,  $cm^{-1}$ )** 3405, 3199, 3033, 1689, 1507, 1451, 1241, 1012.

**M.P.** 314-316 °C.

**HPLC** (IE-3, hexane/isopropyl alcohol = 93/07, flow rate = 1 mL/min,  $\lambda$  = 254 nm), tR = 39.902 min (major), 42.809 min (minor).

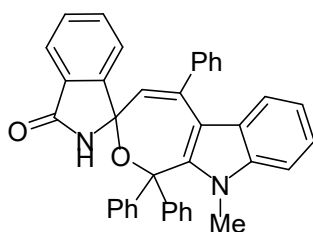

**10'-methyl-1',1',5'-triphenyl-1',10'-dihydrospiro[isindoline-1,3'-oxepino[3,4-b]indol]-3-one (7)**

The resultant residue was purified by flash silicagel column chromatography (eluent: petroleum ether/EA = 3:1, v/v) to afford **9** as a white solid in 22% yield (12 mg).

**$^1H$  NMR (400 MHz,  $CD_2Cl_2$ )**  $\delta$  8.34 (s, 1H), 7.72 – 7.63 (m, 2H), 7.58 (d, J=7.6, 1H), 7.50 (d, J=4.0, 3H), 7.44 (d, J=7.2, 1H), 7.41 – 7.36 (m, 1H), 7.33 – 7.20 (m, 15H), 6.12 (s, 1H), 3.48 (s, 3H) ppm.

**$^{13}C$  NMR (101 MHz,  $CD_2Cl_2$ )**  $\delta$  167.5, 145.7, 143.7, 143.3, 142.6, 142.5, 138.5, 132.2, 131.9, 129.4, 129.0, 128.9, 128.8, 128.7, 128.5, 128.3, 127.6, 123.4, 122.5, 121.1, 120.3, 119.3, 111.0, 109.1, 90.7, 89.6, 31.4 ppm.

**HRMS (ESI-TOF)** m/z:  $[M + H]^+$  Calcd for  $C_{38}H_{29}N_2O_2$  545.2224; Found: 545.2229.

**IR (KBr,  $cm^{-1}$ )** 3401, 3209, 3012, 1705, 1512, 1438, 1153, 891.

**M.P.** 319-321 °C.

## 6. Experimental Procedures for the Transformation of 3s to 8

To the solution of **3s** (65.6 mg, 0.1 mmol) in 1,4-dioxane (3 mL) was added Pd(PPh<sub>3</sub>)<sub>4</sub> (11.6 mg, 0.01 mmol), (4-methoxyphenyl)boronic acid (20 mg, 0.11 mmol) and K<sub>3</sub>PO<sub>4</sub>(42.5 mg, 0.2 mmol). Then, the reaction mixture was stirred at 95 °C for 24 hours under N<sub>2</sub> atmosphere. After the completion of the reaction which was indicated by TLC, water (5 mL) was added to the mixture and the aqueous layer was extracted with EtOAc (3 × 10 mL). The combined organic layers were dried over anhydrous Na<sub>2</sub>SO<sub>4</sub> and concentrated under reduced pressure. Finally, the residue was purified by preparative thin layer chromatography (petroleum ether/ethyl acetate =2:1) on silica gel to afford pure product **8**.

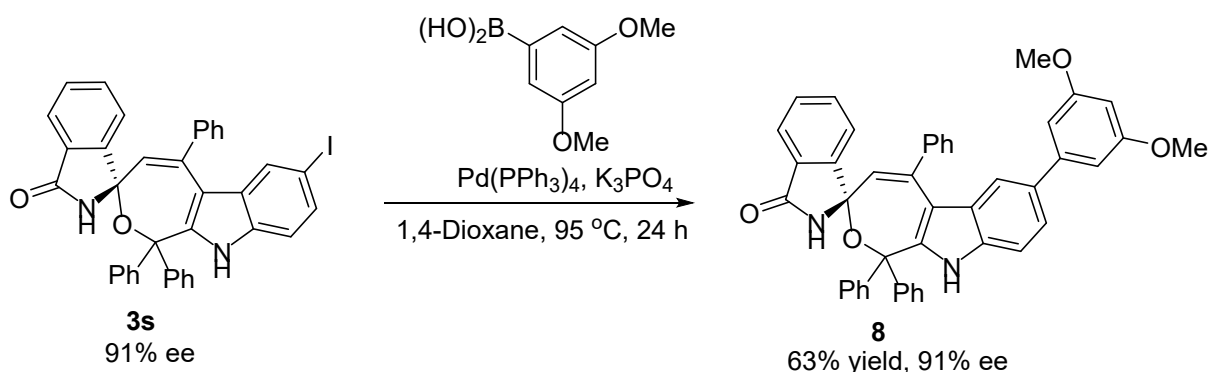

### (S)-7'-(3,5-dimethoxyphenyl)-1',1',5'-triphenyl-1',10'-dihydrospiro[isoinoline-1,3'-oxepino[3,4-b]indol]-3-one (**8**)

The resultant residue was purified by flash silicagel column chromatography (eluent: pure DCM) to afford **8** as a white solid in 63% yield (42 mg) with 91% ee.

<sup>1</sup>H NMR (400 MHz, CD<sub>2</sub>Cl<sub>2</sub>) δ 8.09 (s, 1H), 7.78 (t, J=7.3, 2H), 7.71 (t, J=7.5, 1H), 7.58 (t, J=7.6, 1H), 7.47 – 7.41 (m, 4H), 7.38 – 7.23 (m, 13H), 6.95 (s, 1H), 6.82 (s, 1H), 6.48 (d, J=2.2, 2H), 6.35 (t, J=2.1, 1H), 6.29 (s, 1H), 3.74 (s, 6H) ppm.

<sup>13</sup>C NMR (101 MHz, CD<sub>2</sub>Cl<sub>2</sub>) δ 169.5, 161.5, 150.0, 145.5, 144.4, 144.3, 143.4, 142.9, 138.9, 135.3, 134.7, 133.7, 130.9, 130.2, 129.2, 129.1, 129.00, 128.97, 128.7, 128.6, 128.3,

128.2, 128.0, 127.2, 126.1, 123.9, 123.7, 123.5, 120.1, 115.0, 112.7, 105.5, 99.4, 89.1, 83.7, 55.8 ppm.

**HRMS (ESI-TOF)** m/z: [M + H]<sup>+</sup> Calcd for C<sub>45</sub>H<sub>35</sub>N<sub>2</sub>O<sub>4</sub> 667.2591; Found: 667.2594.

**IR (KBr, cm<sup>-1</sup>)** 3403, 3045, 2943, 2821, 1627, 1401, 1341, 1201, 812.

**M.P.** 332-334 °C. [α]<sub>D</sub><sup>20</sup> = +87 ° (c = 1.0, CH<sub>2</sub>Cl<sub>2</sub>)

**HPLC** (OD-H, hexane/isopropyl alcohol = 70/30, flow rate = 1 mL/min, λ = 254 nm), tR = 4.246 min (minor), 5.748 min (major).

## 8. Scale-up experiment

2-indolymethanols **11** (1.5 mmol), α-(3-isoindolinonyl) propargylic alcohol **2a** (1.0 mmol), chiral phosphoric acid (**R**)-**C1** (10 mol%) and HFIP (1.5 eq) were added to a dried tube under an air atmosphere. Then, dichlorofluoroethane (10 mL) was added to the reaction mixture, which was stirred at rt for 72 h. After the completion of the reaction which was indicated by TLC, the reaction mixture was directly purified by column chromatography using PE:EA=3:1 as eluent to afford pure products (**S**)-**3z**.

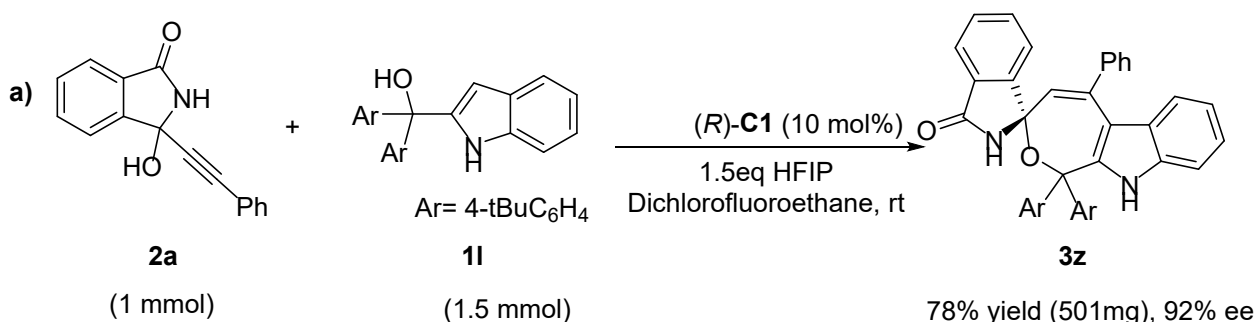

## 9. HR MS copies of intermediates

To get a mechanistic insight into reaction mechanism, we performed the following control experiment. To gain insight into the mechanism of mono-cyclization reaction and bis-cyclization reaction, we monitored the reaction of 2-indolymethanol with propargylic



alcohols and tried to isolate some intermediate products. Disappointingly, we failed to obtain an intermediate product. Therefore, we tried to detect the signals of some possible intermediates via HRMS. After stirring the reaction for 2 hours, we detected useful signals via HRMS. The signal at  $[M+H]^+$   $m/z$  232.0758 was possibly due to propargylic *N*-acyl imines intermediate.

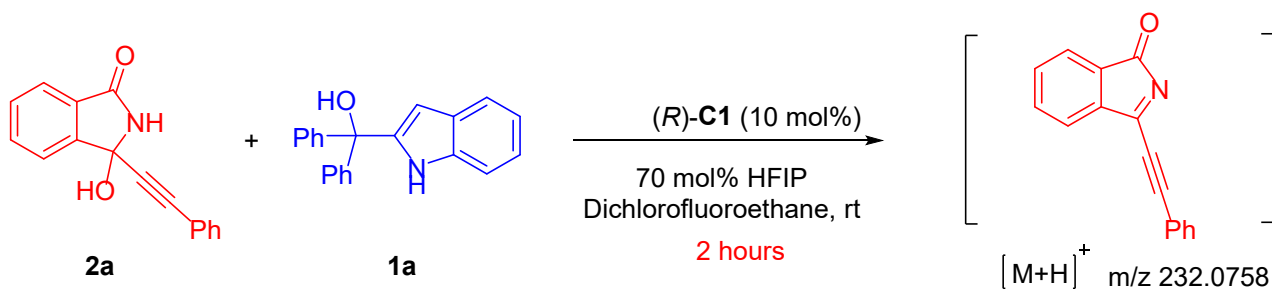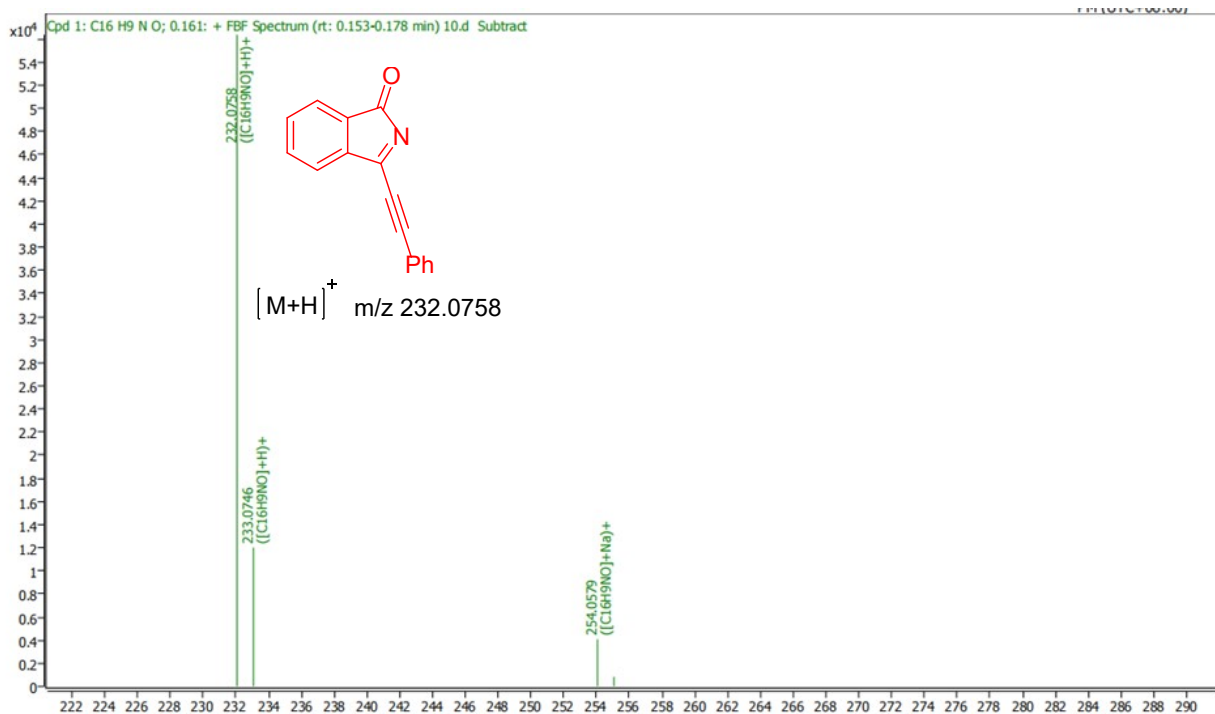

## 10. X-Ray Structure and Crystal Data of **3c**

Single crystal of **3c** was obtained from the mixed solution of dichloromethane and petroleum ether (1:1) maintained at rt for a week. The absolute structure of product **3c** was

determined by X-ray diffraction analysis of a single crystal (Bruker APEX-II CCD' diffractometer). The X-ray data have been deposited at the Cambridge Crystallographic Data Center (CCDC 2314995). The stereochemistry of other products was assumed by analogy.

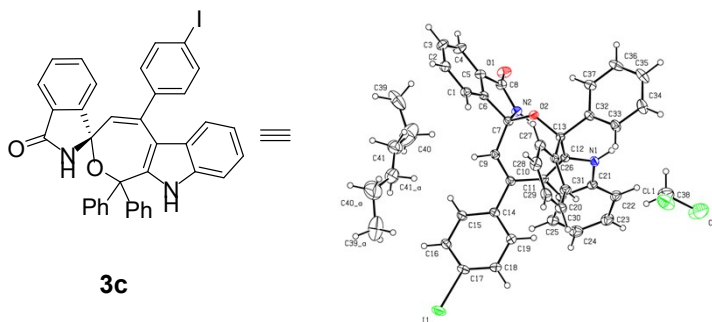

**Table 1 Crystal data and structure refinement for 3c.**

|                     |                                                                                |
|---------------------|--------------------------------------------------------------------------------|
| Identification code | mo_231204_RKH012_0m                                                            |
| Empirical formula   | C <sub>41</sub> H <sub>34</sub> Cl <sub>2</sub> IN <sub>2</sub> O <sub>2</sub> |
| Formula weight      | 784.50                                                                         |
| Temperature/K       | 170.00                                                                         |
| Crystal system      | monoclinic                                                                     |
| Space group         | C2                                                                             |
| a/Å                 | 26.7116(11)                                                                    |
| b/Å                 | 10.1135(4)                                                                     |
| c/Å                 | 16.0912(6)                                                                     |
| α /°                | 90                                                                             |
| β /°                | 122.7760(10)                                                                   |
| γ /°                | 90                                                                             |

|                                             |                                                               |
|---------------------------------------------|---------------------------------------------------------------|
| Volume/Å <sup>3</sup>                       | 3654.9(3)                                                     |
| Z                                           | 4                                                             |
| $\rho_{\text{calc}}/\text{cm}^3$            | 1.426                                                         |
| $\mu/\text{mm}^{-1}$                        | 1.060                                                         |
| F(000)                                      | 1588.0                                                        |
| Crystal size/mm <sup>3</sup>                | 0.42 × 0.17 × 0.1                                             |
| Radiation                                   | MoK $\alpha$ ( $\lambda = 0.71073$ )                          |
| 2 $\Theta$ range for data collection/°      | 4.416 to 55.032                                               |
| Index ranges                                | -34 ≤ h ≤ 34, -13 ≤ k ≤ 13, -20 ≤ l ≤ 20                      |
| Reflections collected                       | 57727                                                         |
| Independent reflections                     | 8380 [R <sub>int</sub> = 0.0412, R <sub>sigma</sub> = 0.0285] |
| Data/restraints/parameters                  | 8380/4/434                                                    |
| Goodness-of-fit on F <sup>2</sup>           | 1.096                                                         |
| Final R indexes [I > 2 $\sigma$ (I)]        | R <sub>1</sub> = 0.0366, wR <sub>2</sub> = 0.0812             |
| Final R indexes [all data]                  | R <sub>1</sub> = 0.0438, wR <sub>2</sub> = 0.0852             |
| Largest diff. peak/hole / e Å <sup>-3</sup> | 0.38/-0.52                                                    |
| Flack parameter                             | 0.009(5)                                                      |

## 11. Copies of NMR spectra

<sup>1</sup>H NMR (400 MHz, CD<sub>2</sub>Cl<sub>2</sub>) of **3a**

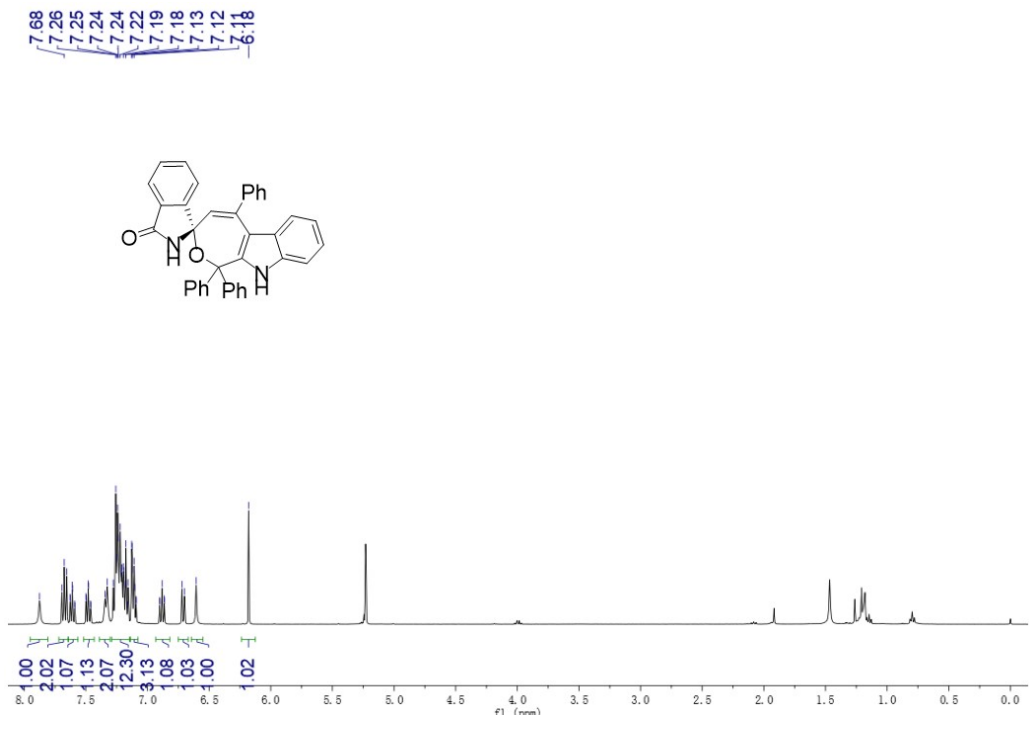

$^{13}\text{C}$  NMR (101 MHz,  $\text{CD}_2\text{Cl}_2$ ) of **3a**

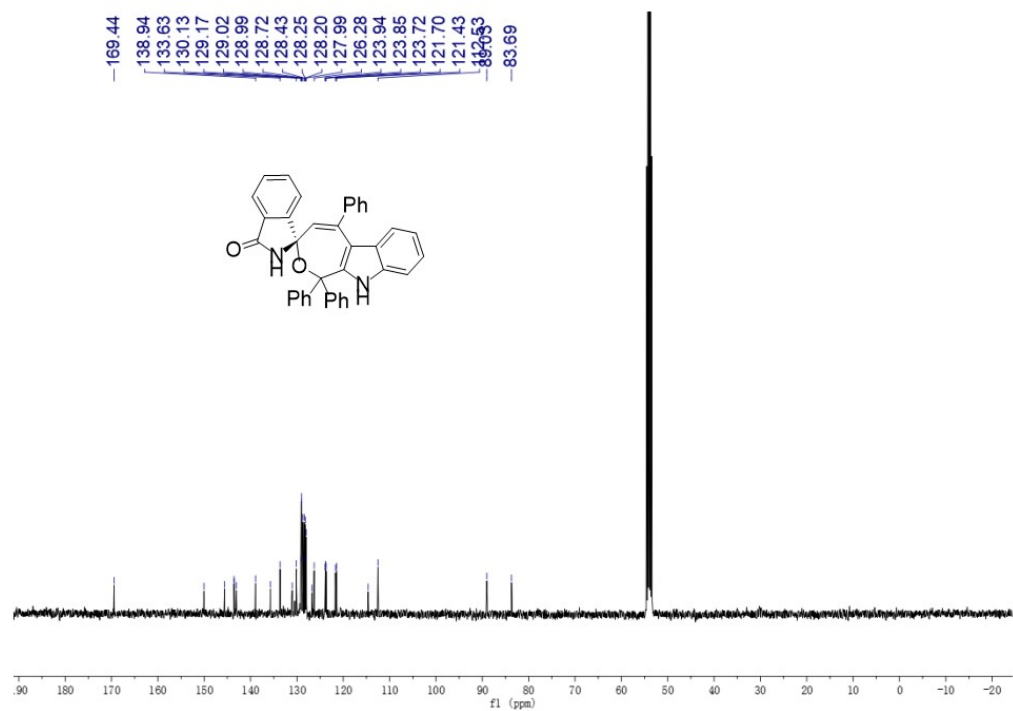

$^1\text{H}$  NMR (400 MHz,  $\text{CD}_2\text{Cl}_2$ ) of **3b**

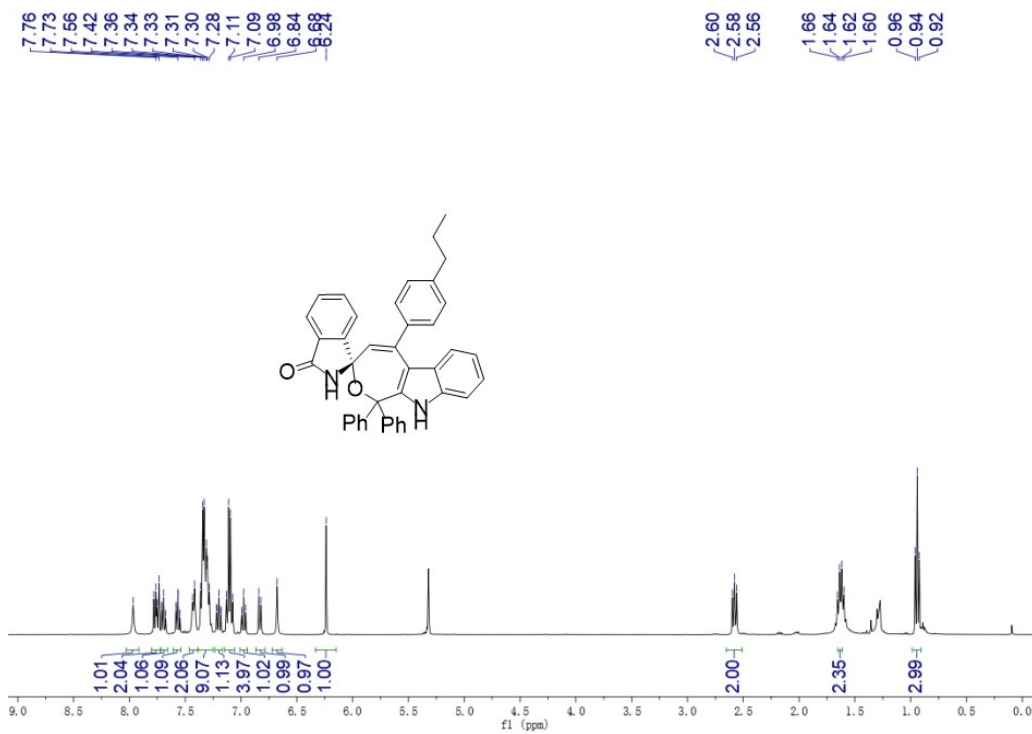

<sup>13</sup>C NMR (101 MHz, CD<sub>2</sub>Cl<sub>2</sub>) of **3b**

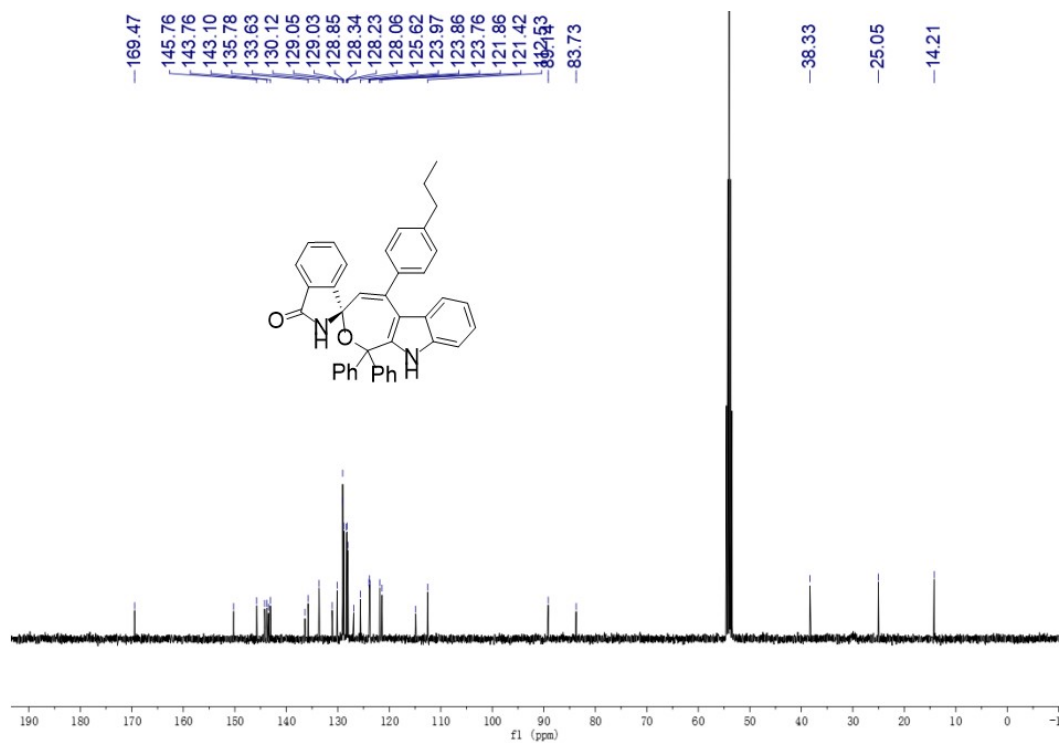

<sup>1</sup>H NMR (400 MHz, CD<sub>2</sub>Cl<sub>2</sub>) of **3c**

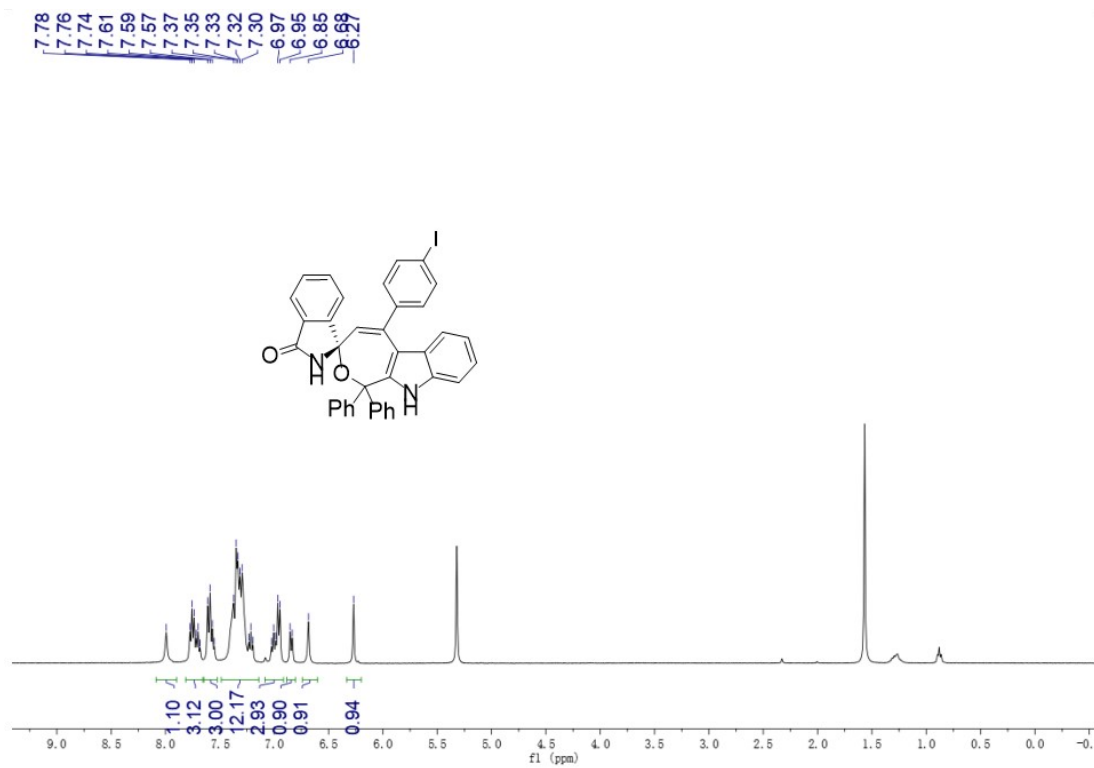

$^{13}\text{C}$  NMR (101 MHz,  $\text{CD}_2\text{Cl}_2$ ) of **3c**

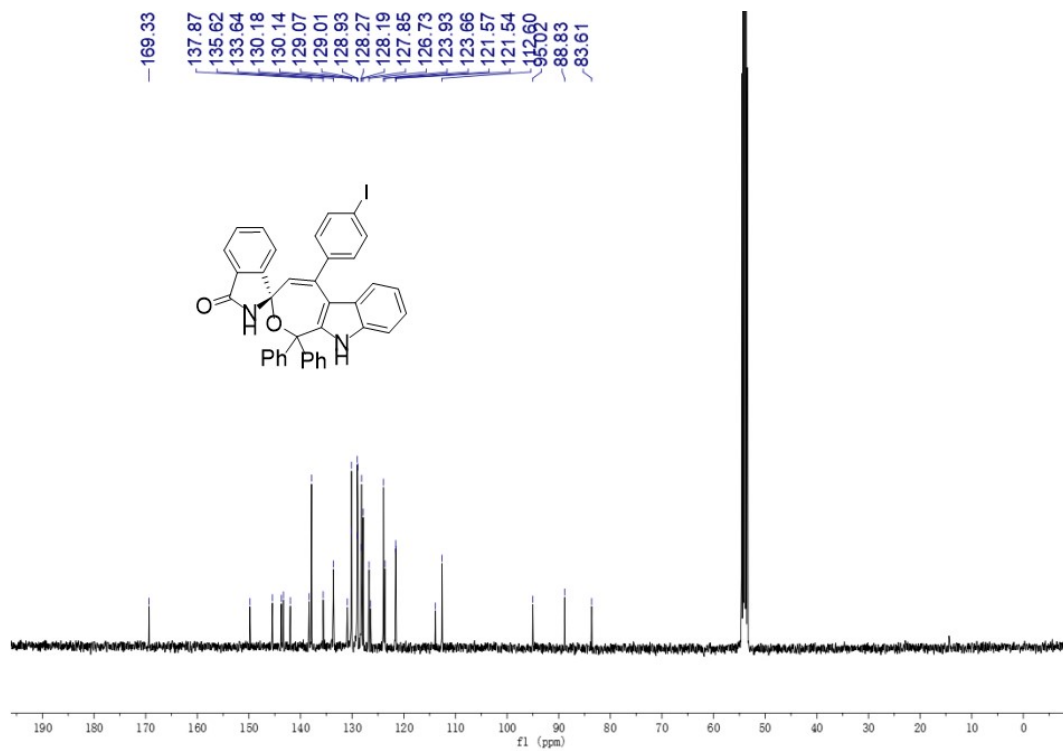

$^1\text{H}$  NMR (400 MHz,  $\text{CD}_2\text{Cl}_2$ ) of **3d**

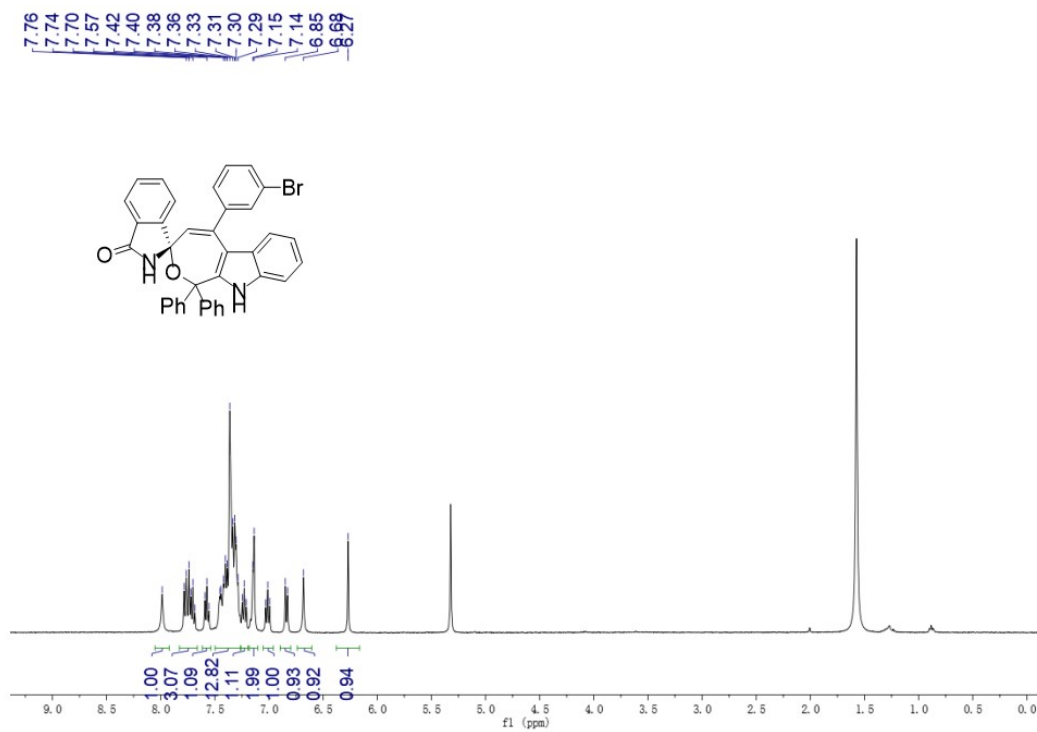

$^{13}\text{C}$  NMR (101 MHz,  $\text{CD}_2\text{Cl}_2$ ) of **3d**

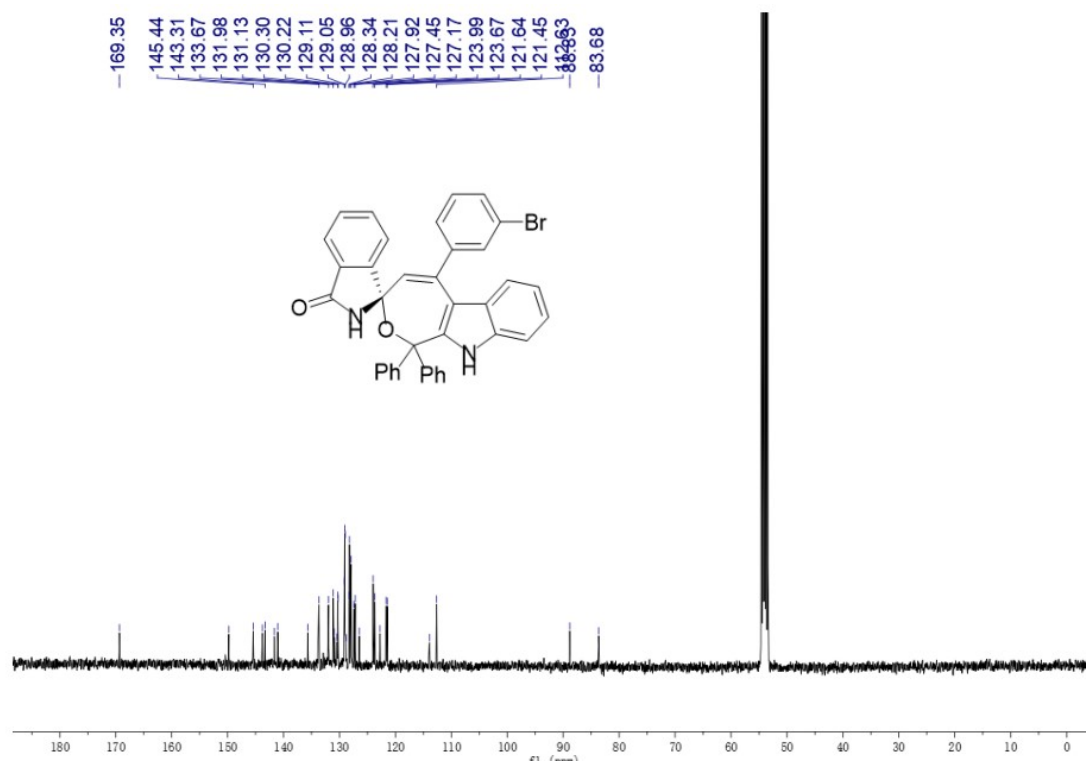

$^1\text{H}$  NMR (400 MHz,  $\text{CD}_2\text{Cl}_2$ ) of **3e**

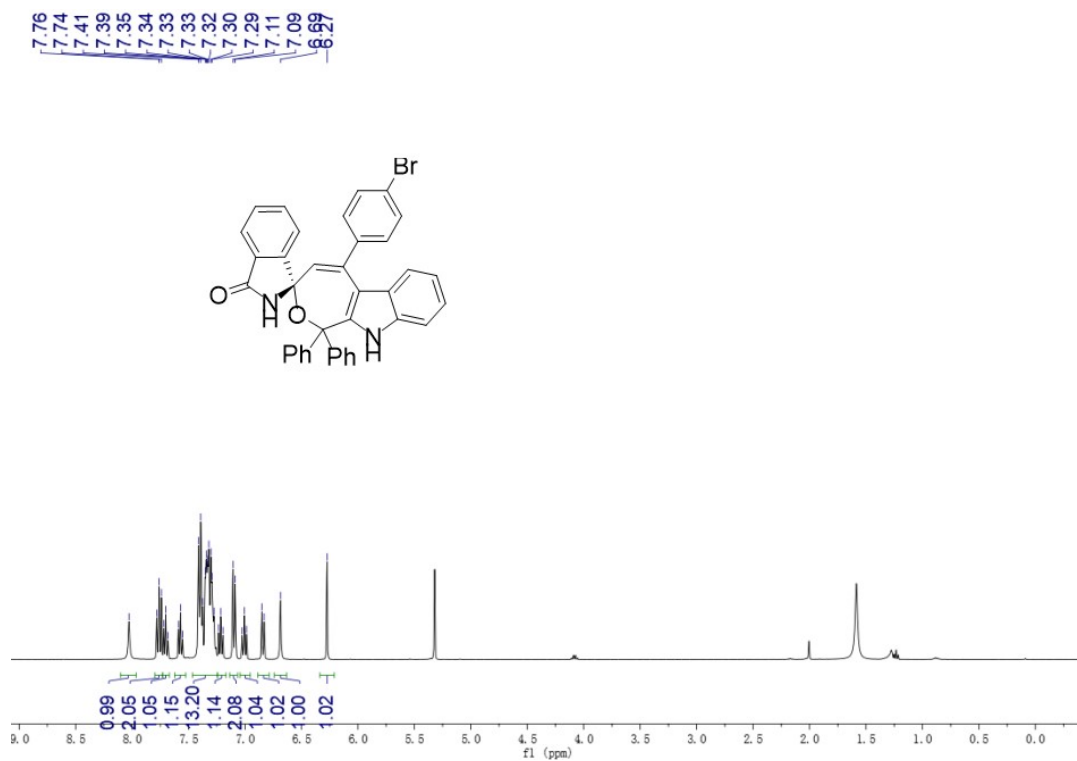

$^{13}\text{C}$  NMR (101 MHz,  $\text{CD}_2\text{Cl}_2$ ) of **3e**

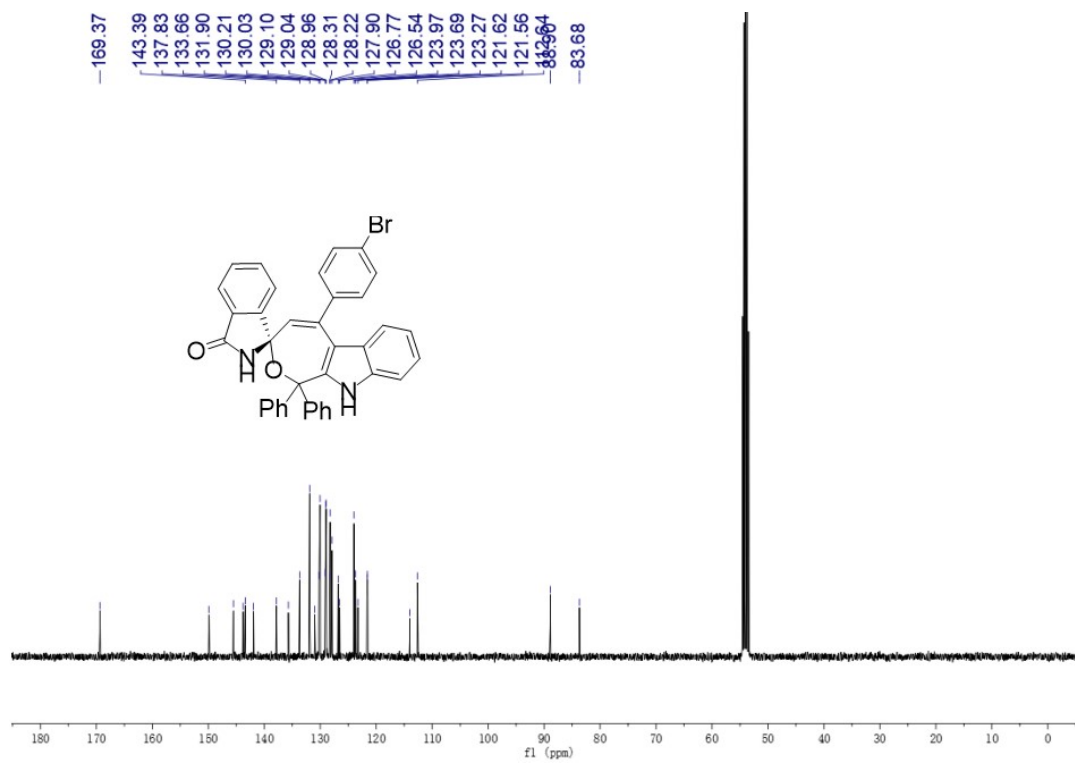

$^1\text{H}$  NMR (400 MHz,  $\text{CD}_2\text{Cl}_2$ ) of **3f**



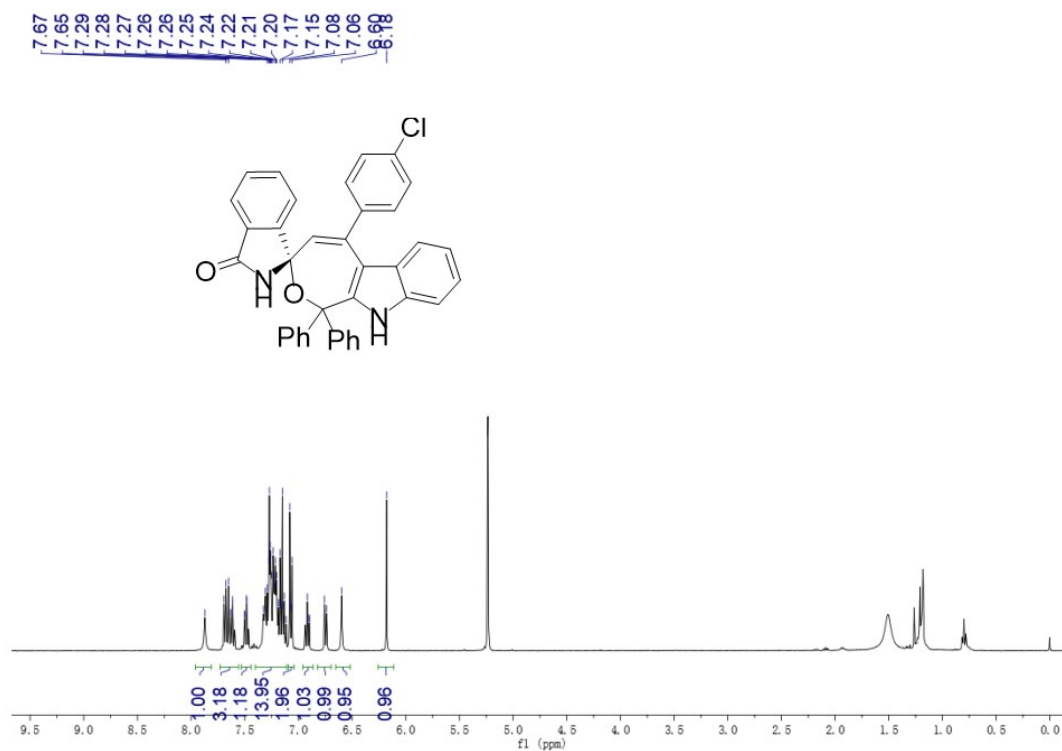

<sup>13</sup>C NMR (101 MHz, CD<sub>2</sub>Cl<sub>2</sub>) of **3f**

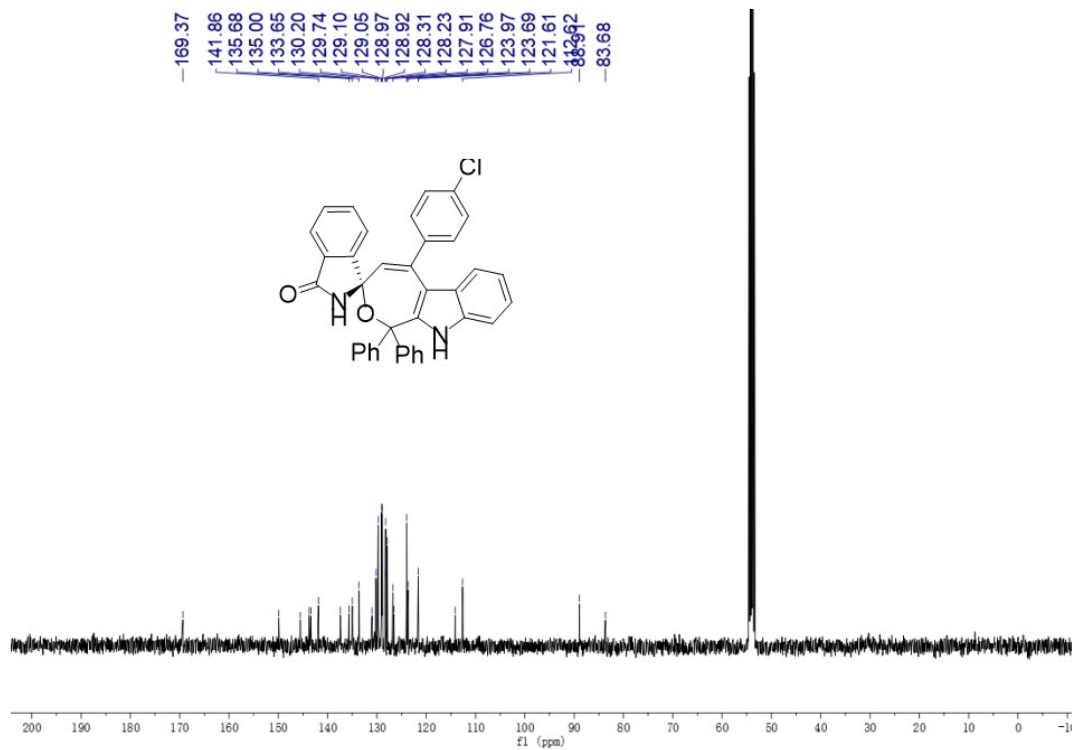

<sup>1</sup>H NMR (400 MHz, CD<sub>2</sub>Cl<sub>2</sub>) of **3g**

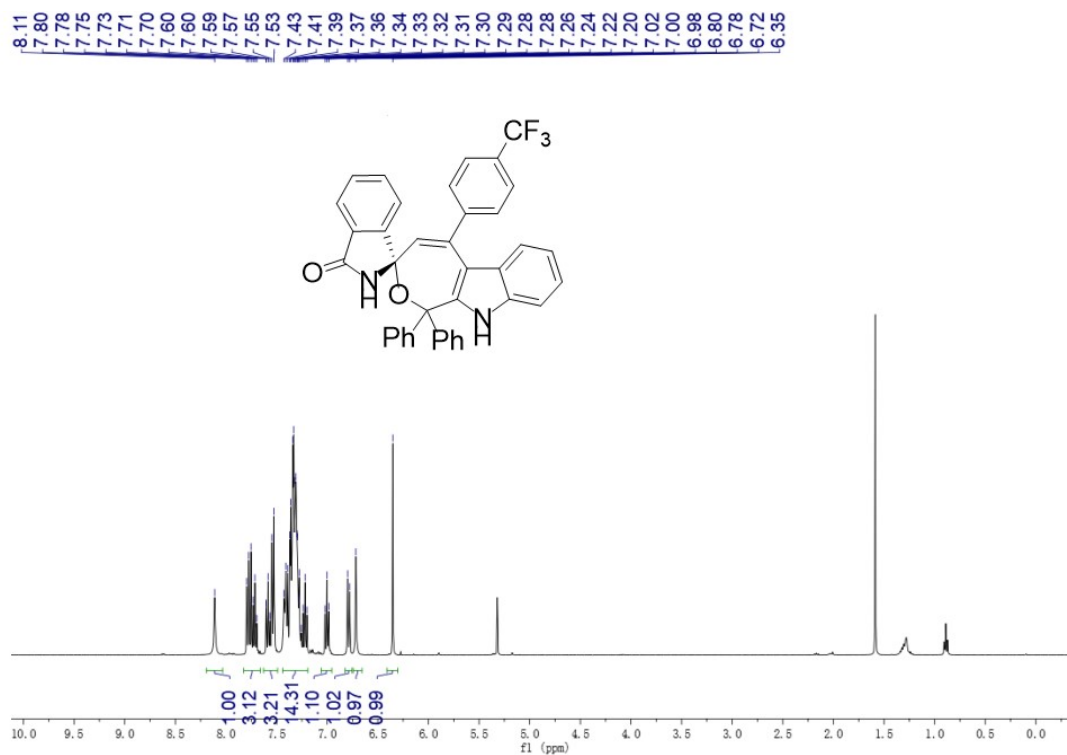

<sup>13</sup>C NMR (101 MHz, CD<sub>2</sub>Cl<sub>2</sub>) of **3g**

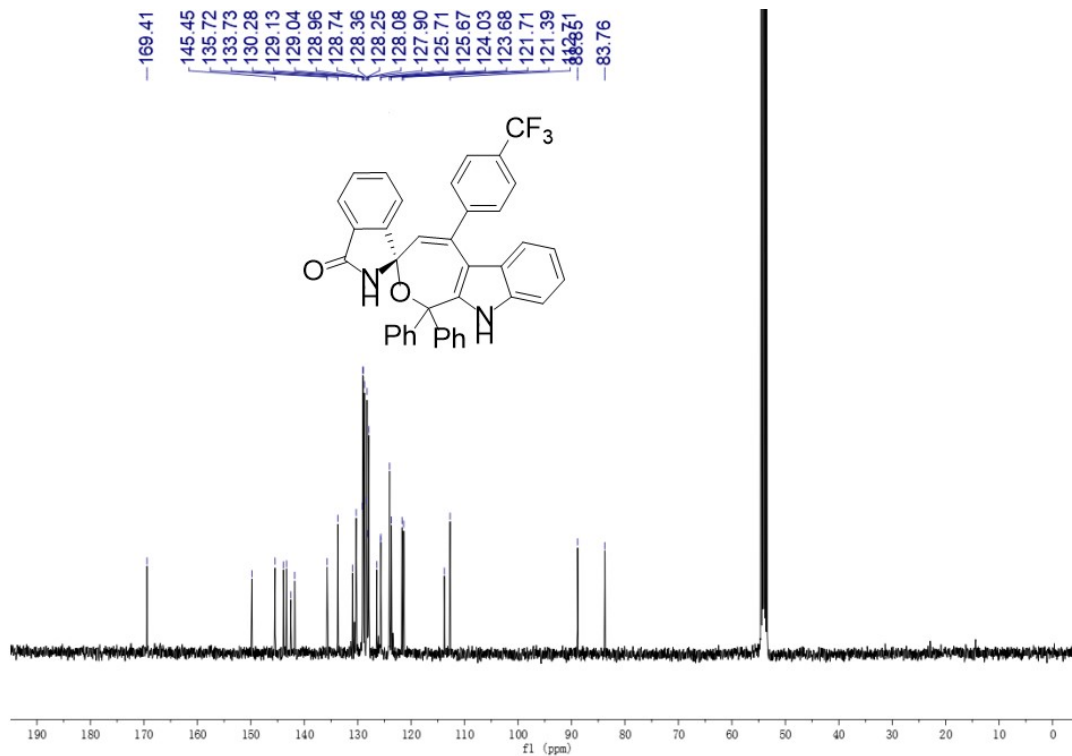

<sup>19</sup>F NMR (376MHz, CD<sub>2</sub>Cl<sub>2</sub>) of **3g**

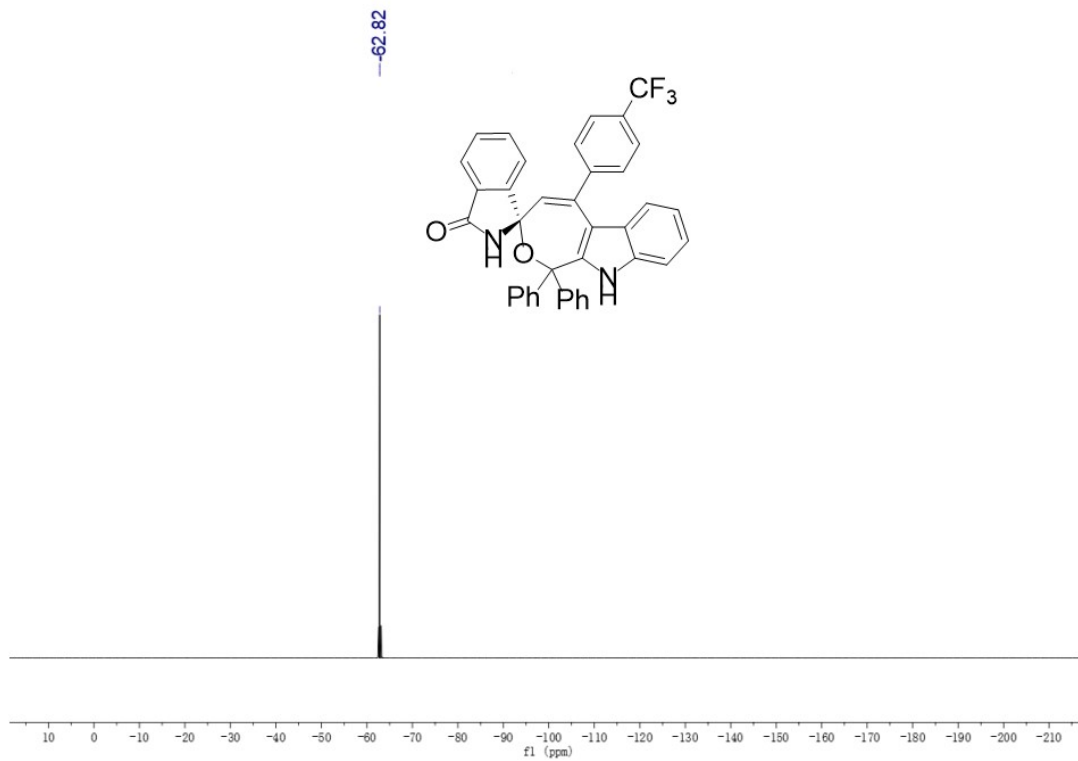

$^1\text{H}$  NMR (400 MHz,  $\text{CD}_2\text{Cl}_2$ ) of **3h**

8.14  
7.81  
7.79  
7.77  
7.74  
7.74  
7.72  
7.70  
7.70  
7.64  
7.63  
7.62  
7.61  
7.59  
7.59  
7.57  
7.57  
7.55  
7.53  
7.47  
7.45  
7.43  
7.39  
7.37  
7.36  
7.33  
7.33  
7.32  
7.31  
7.29  
7.24  
7.23  
7.22  
7.21  
7.20  
7.19  
7.03  
7.01  
6.99  
6.96  
6.94  
6.72  
6.35

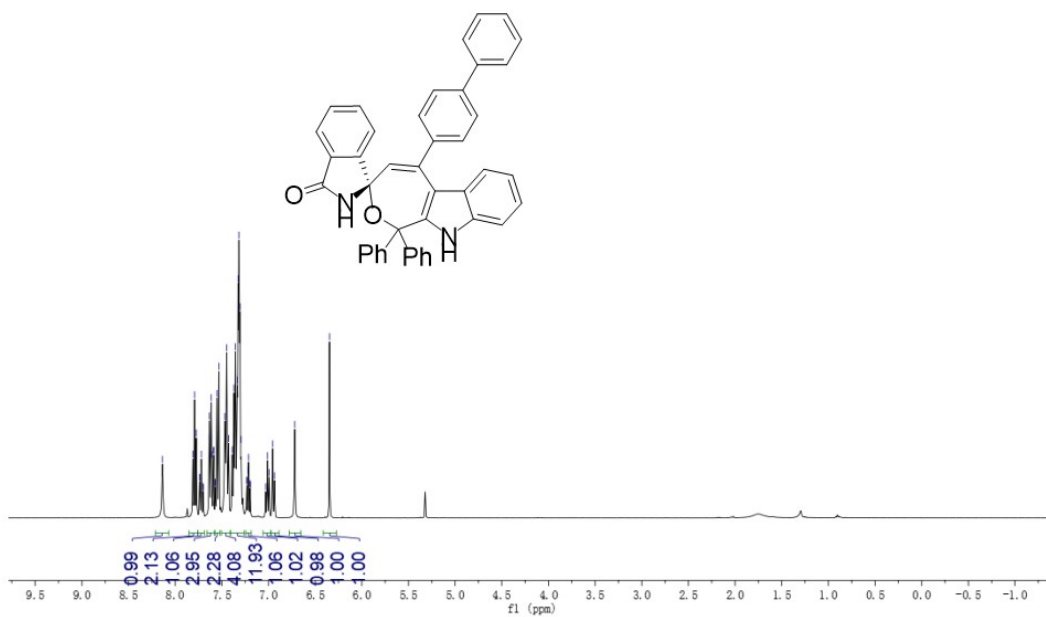

$^{13}\text{C}$  NMR (101 MHz,  $\text{CD}_2\text{Cl}_2$ ) of **3h**

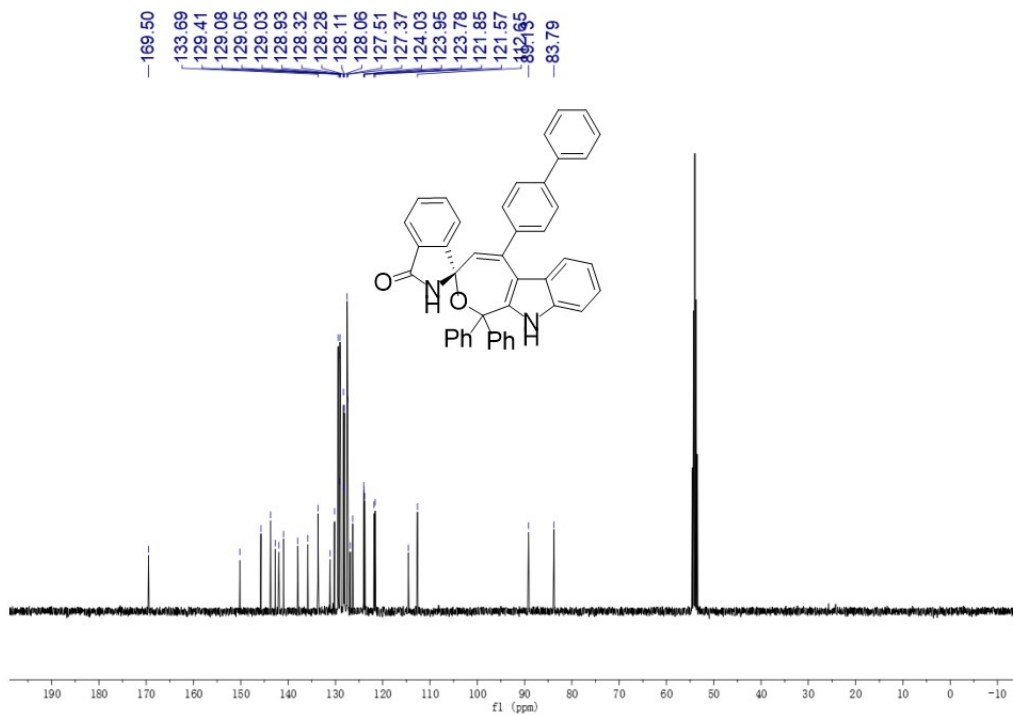

<sup>1</sup>H NMR (400 MHz, CD<sub>2</sub>Cl<sub>2</sub>) of **3i**

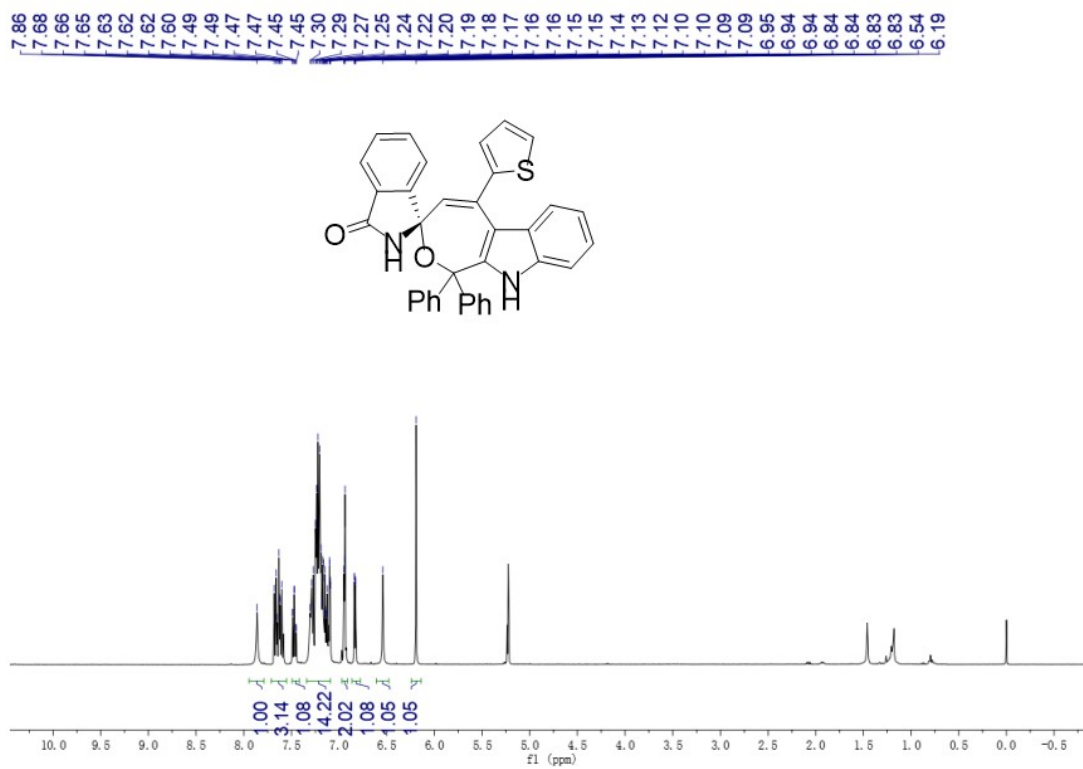

<sup>13</sup>C NMR (101 MHz, CD<sub>2</sub>Cl<sub>2</sub>) of **3i**

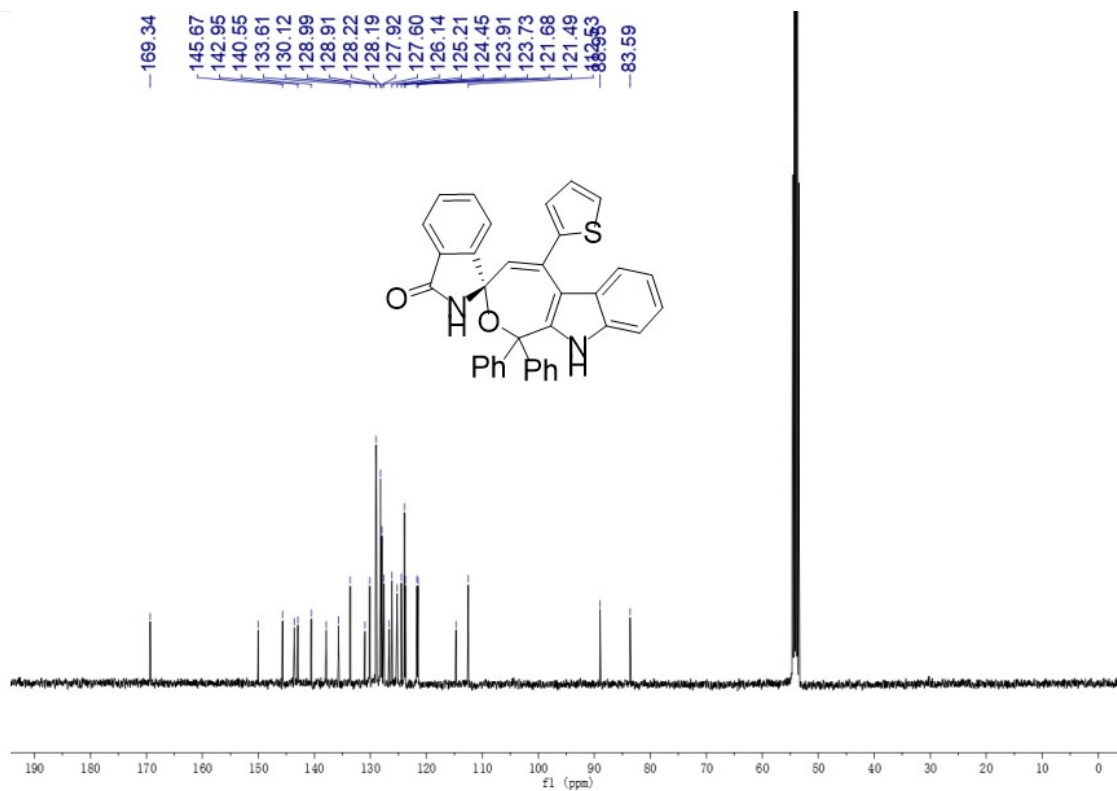

<sup>1</sup>H NMR (400 MHz, CD<sub>2</sub>Cl<sub>2</sub>) of **3j**

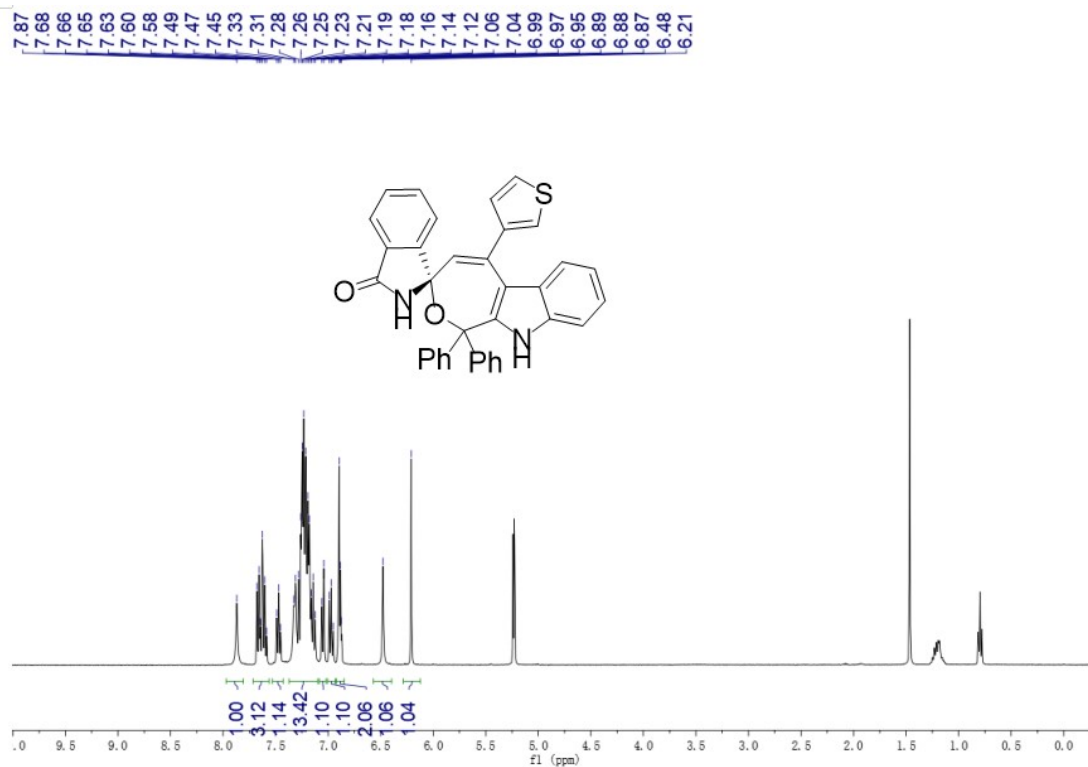

<sup>13</sup>C NMR (101 MHz, CD<sub>2</sub>Cl<sub>2</sub>) of **3j**

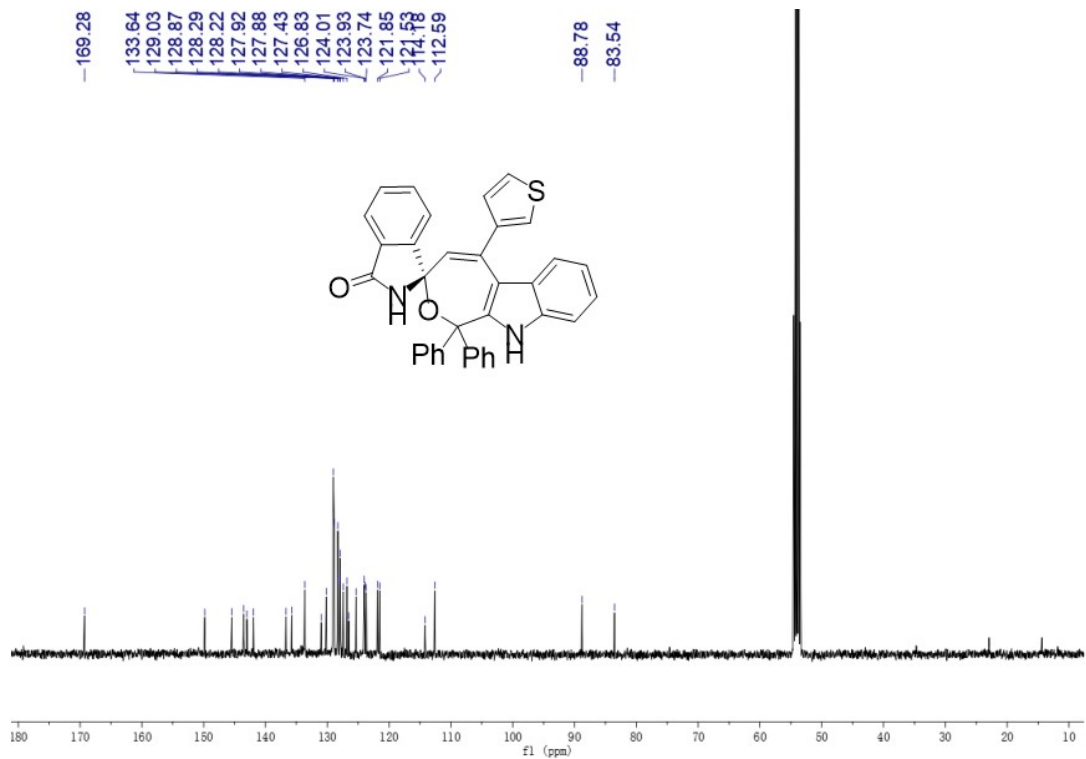

<sup>1</sup>H NMR (400 MHz, CD<sub>2</sub>Cl<sub>2</sub>) of **3k**

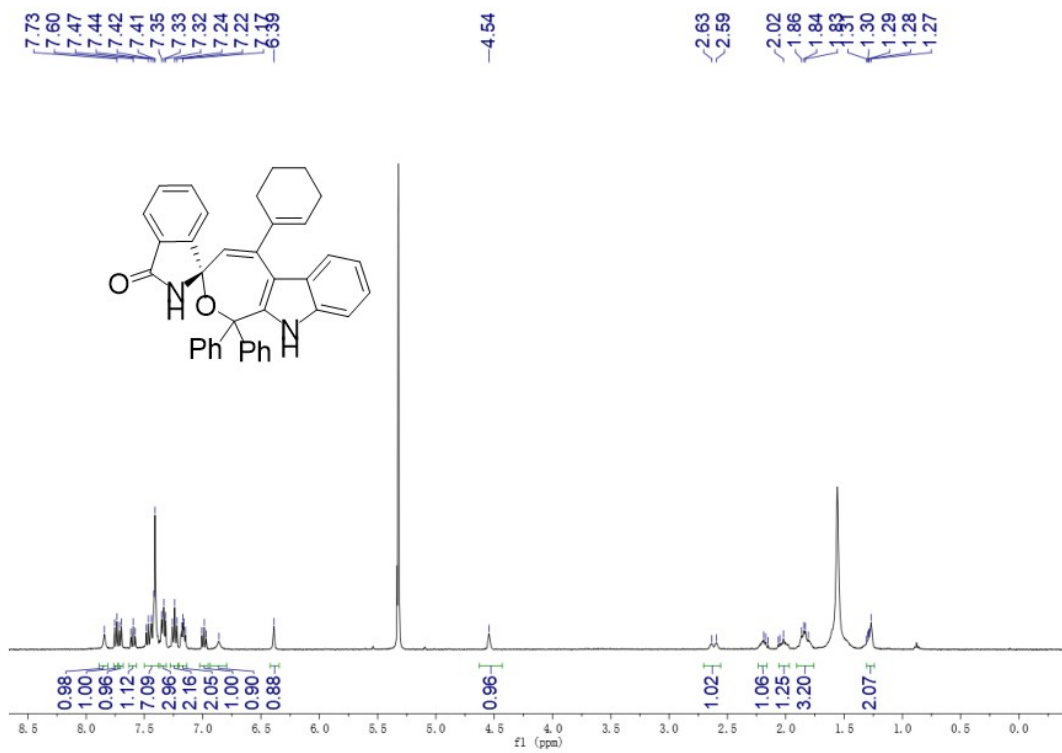

<sup>13</sup>C NMR (101 MHz, CD<sub>2</sub>Cl<sub>2</sub>) of **3k**

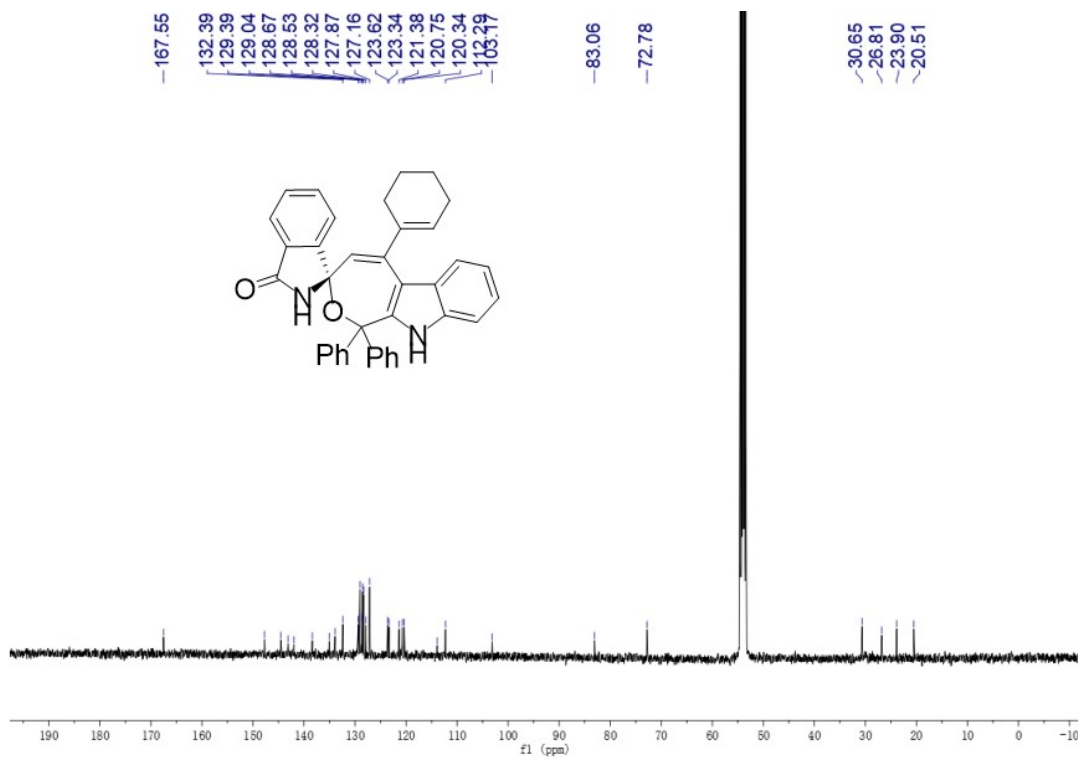

<sup>1</sup>H NMR (400 MHz, CD<sub>2</sub>Cl<sub>2</sub>) of **31**

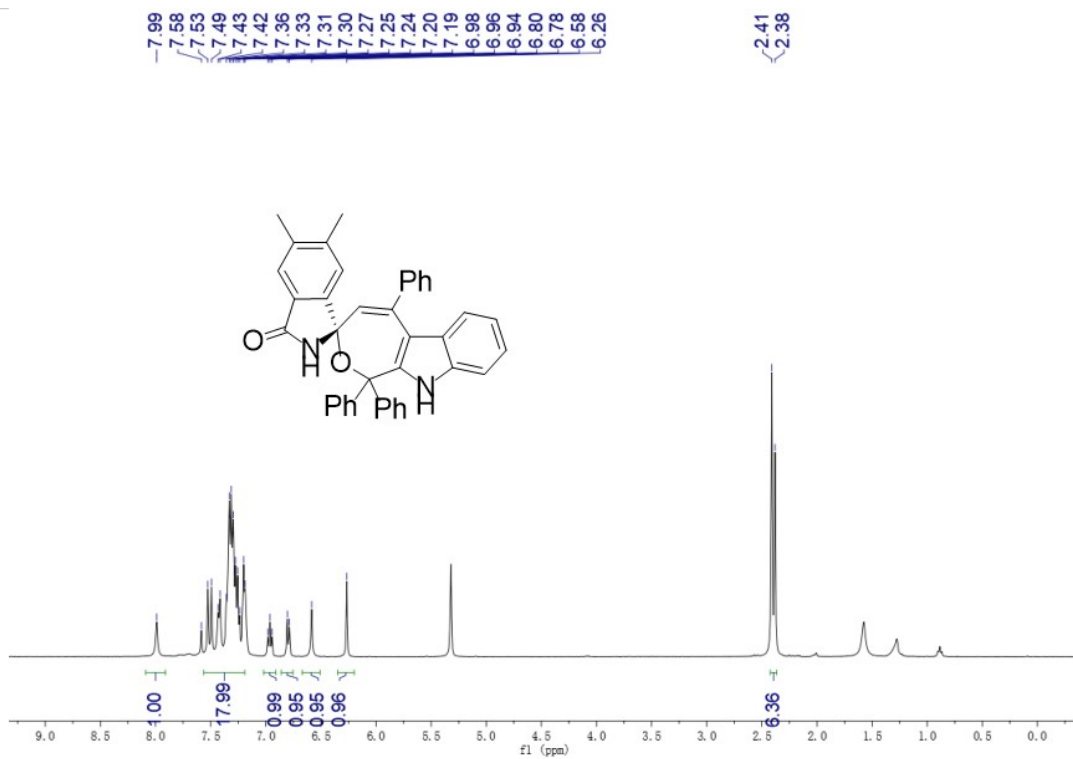

<sup>13</sup>C NMR (101 MHz, CD<sub>2</sub>Cl<sub>2</sub>) of **31**

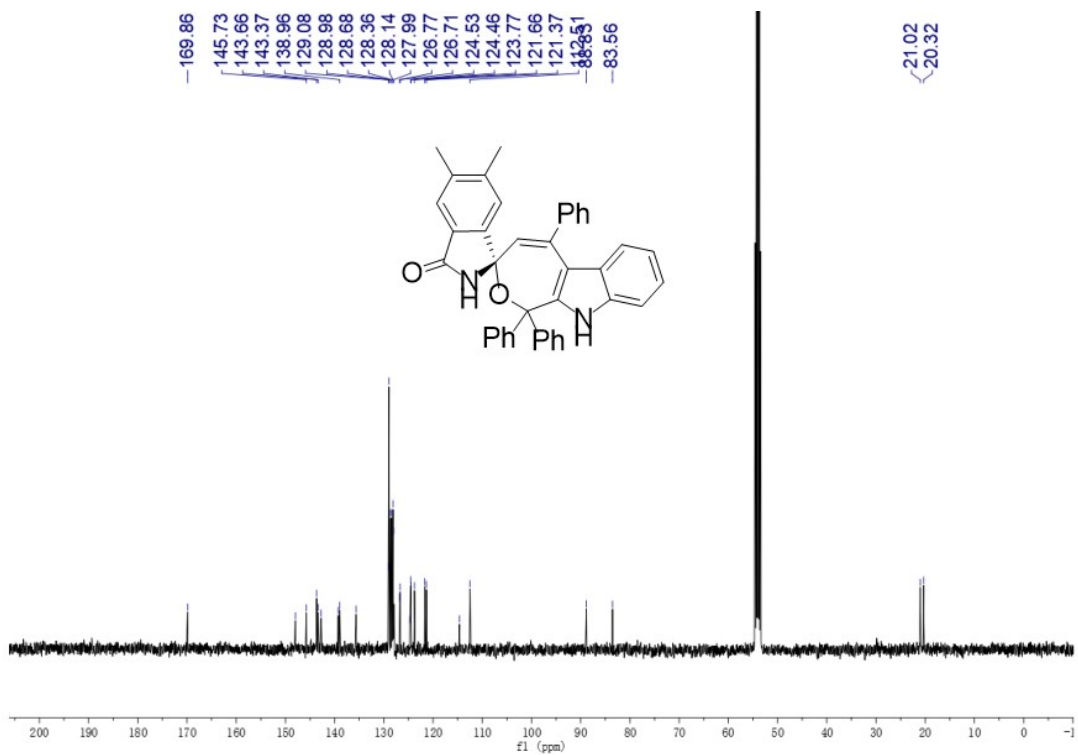

<sup>1</sup>H NMR (400 MHz, CD<sub>2</sub>Cl<sub>2</sub>) of **3m**

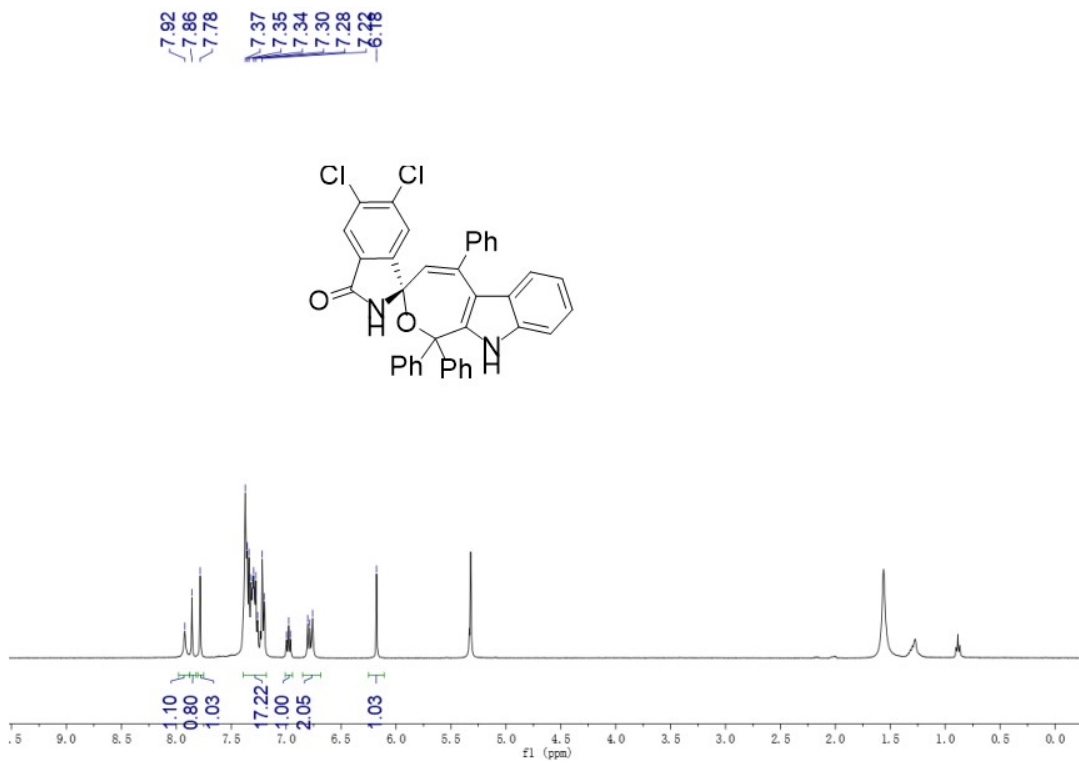

<sup>13</sup>C NMR (101 MHz, CD<sub>2</sub>Cl<sub>2</sub>) of **3m**



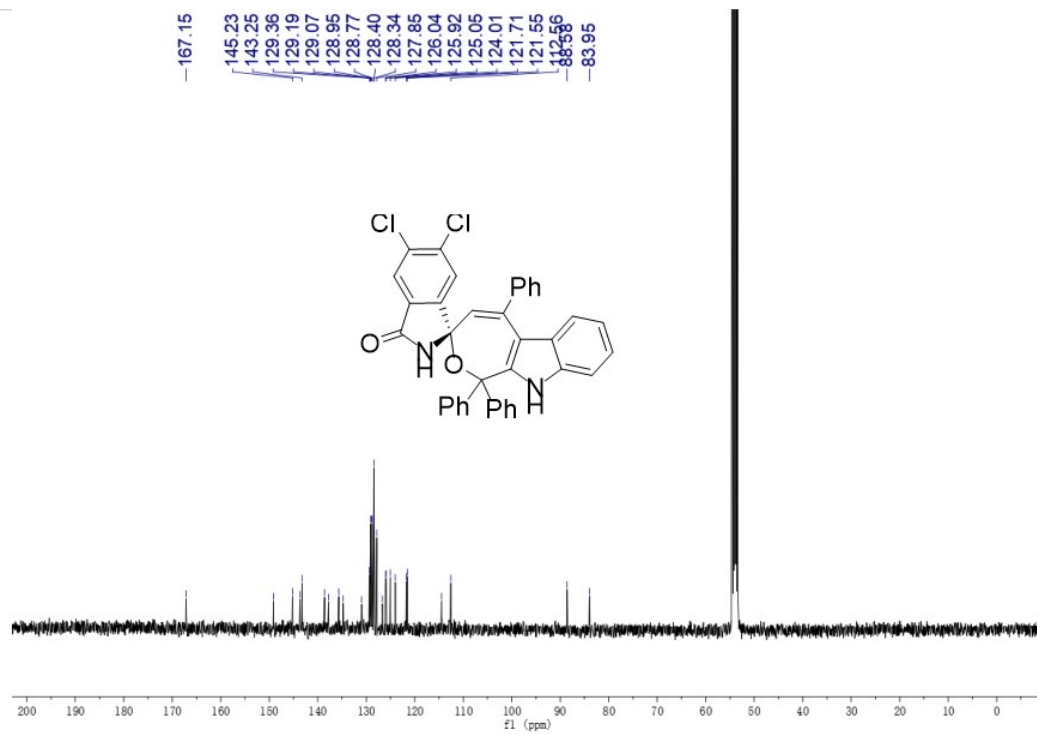

<sup>1</sup>H NMR (400 MHz, CD<sub>2</sub>Cl<sub>2</sub>) of **3n**

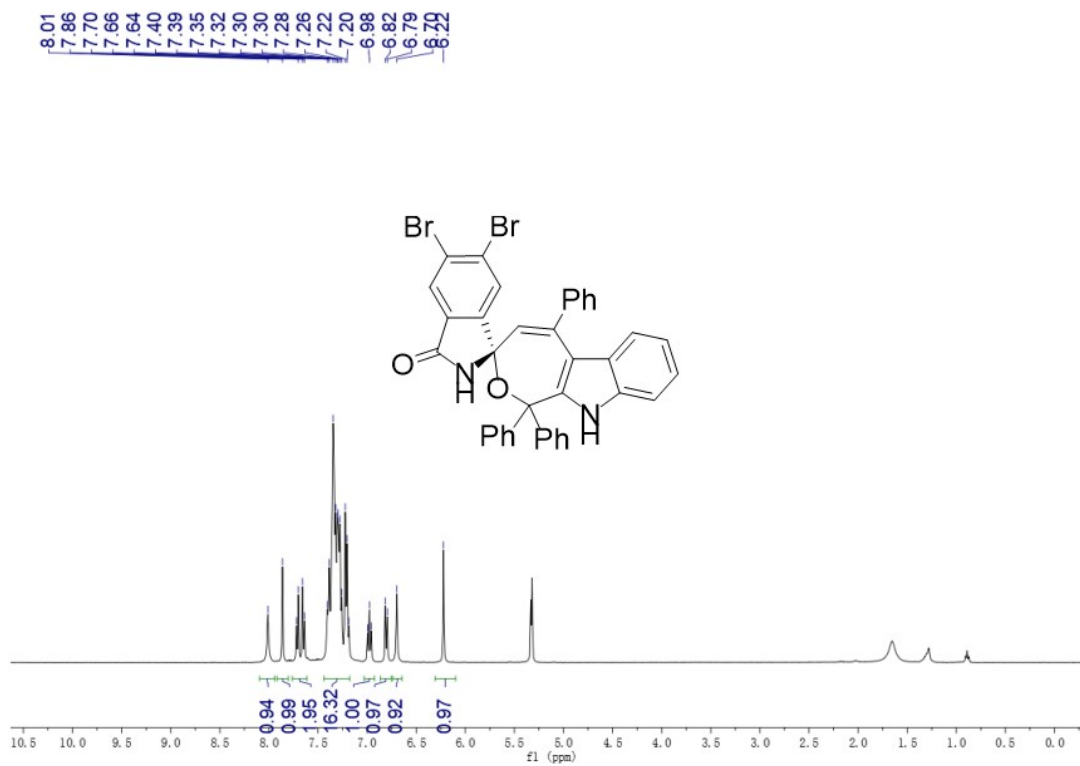

<sup>13</sup>C NMR (101 MHz, CD<sub>2</sub>Cl<sub>2</sub>) of **3n**

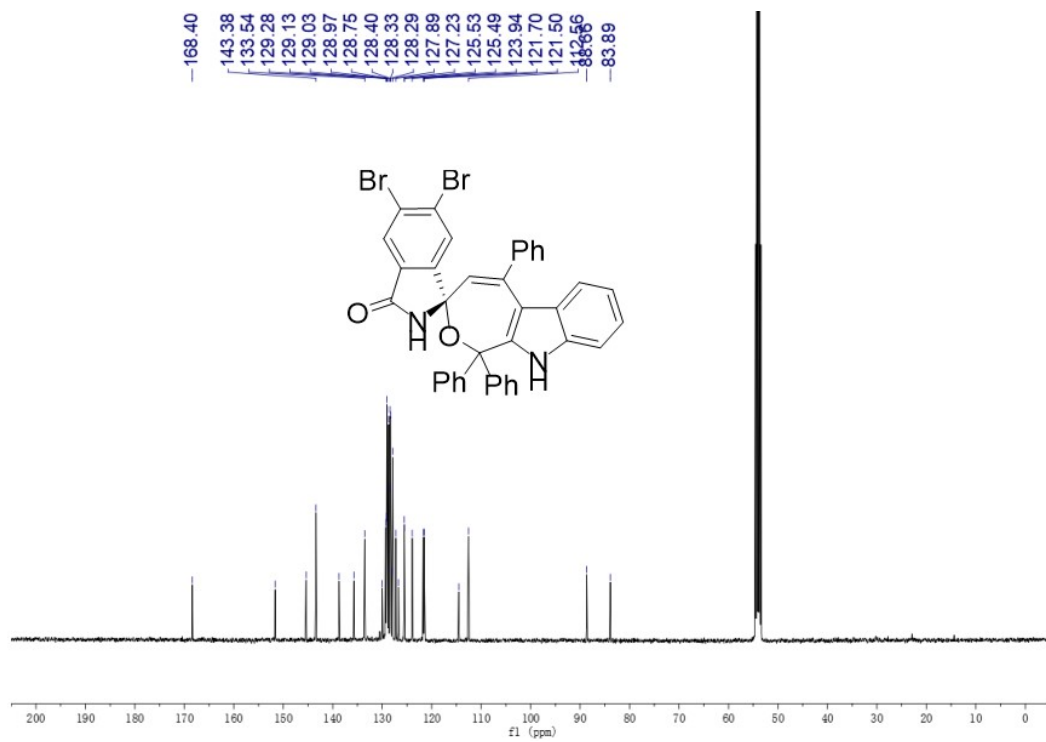

$^1\text{H}$  NMR (400 MHz,  $\text{CD}_2\text{Cl}_2$ ) of **3o**

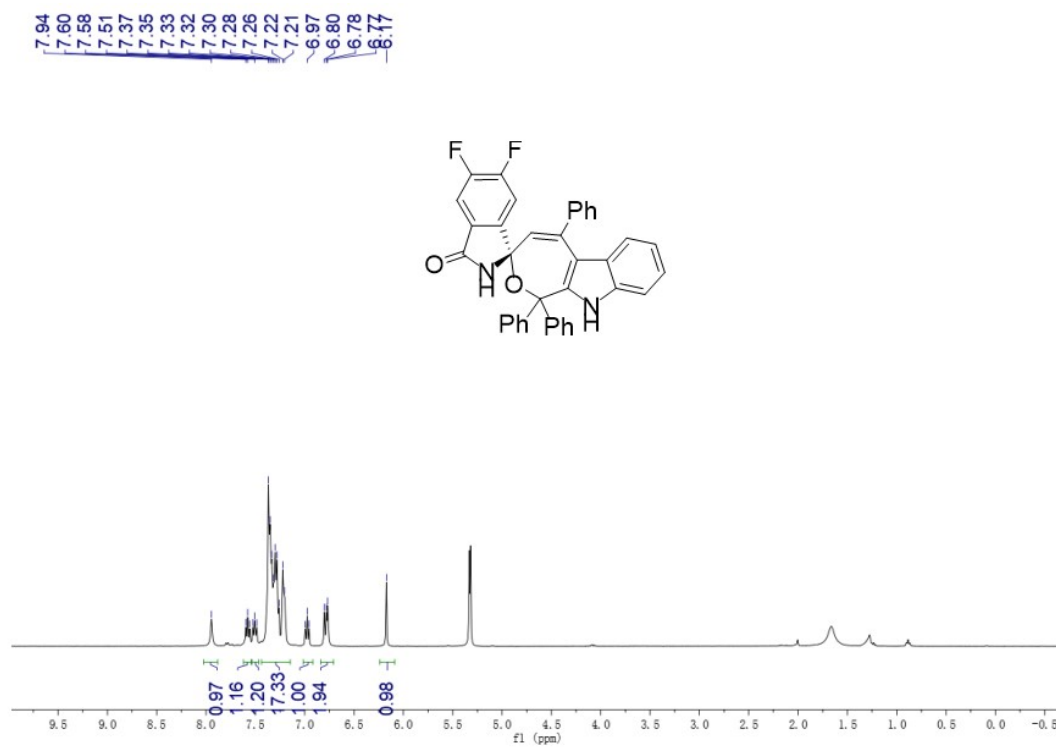

$^{13}\text{C}$  NMR (101 MHz,  $\text{CD}_2\text{Cl}_2$ ) of **3o**

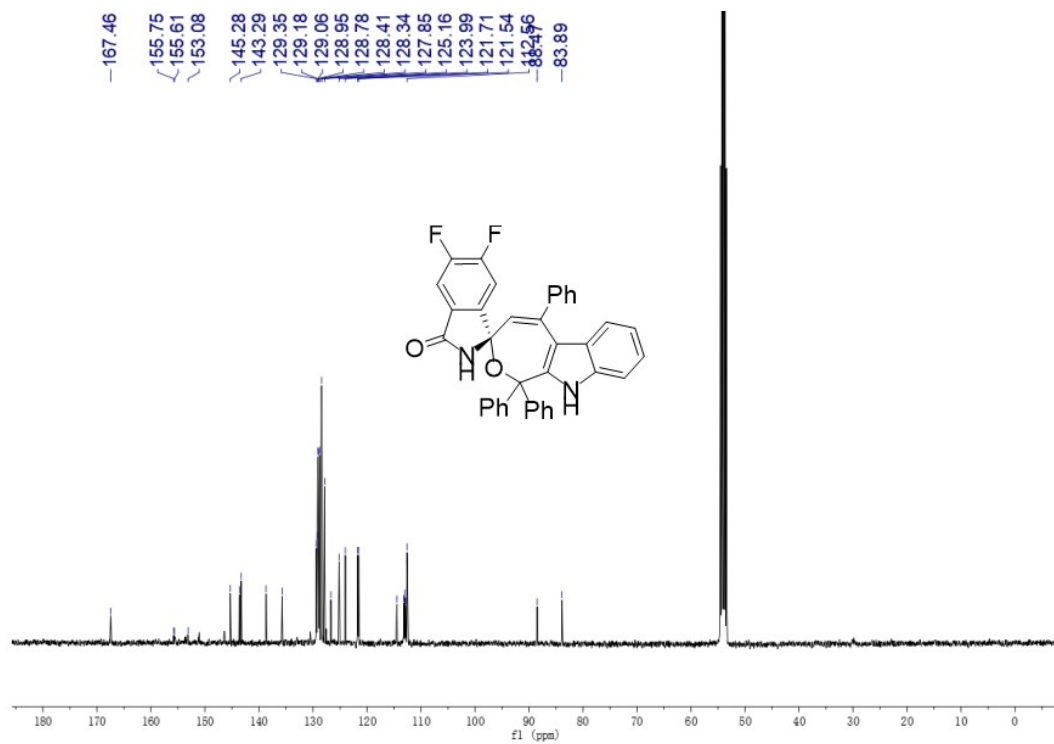

$^{13}\text{C}$  NMR (376MHz,  $\text{CD}_2\text{Cl}_2$ ) of **3o**

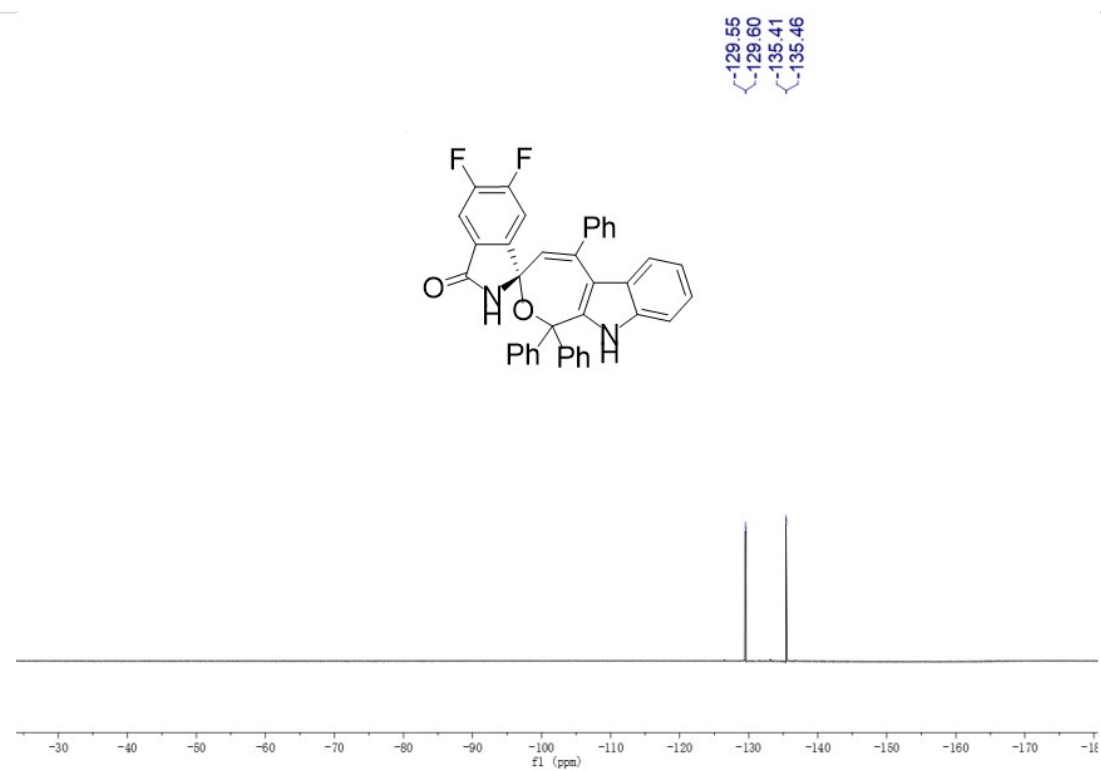

$^{13}\text{C}$  NMR (400 MHz,  $\text{CD}_2\text{Cl}_2$ ) of **3p**

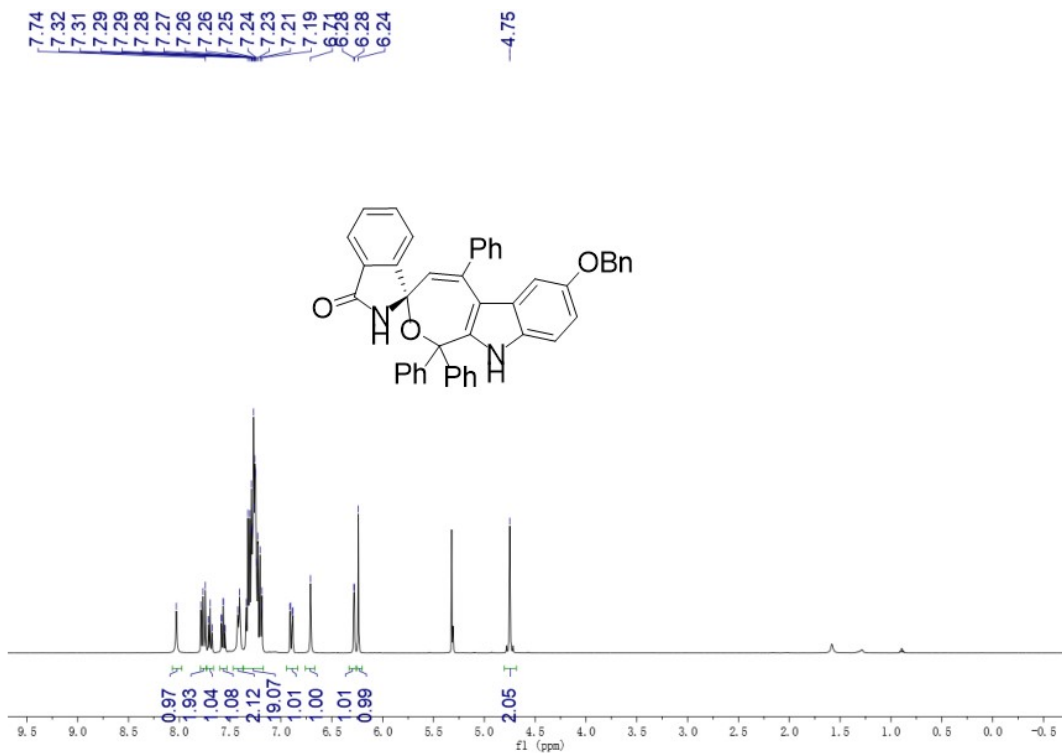

<sup>13</sup>C NMR (101 MHz, CD<sub>2</sub>Cl<sub>2</sub>) of **3p**

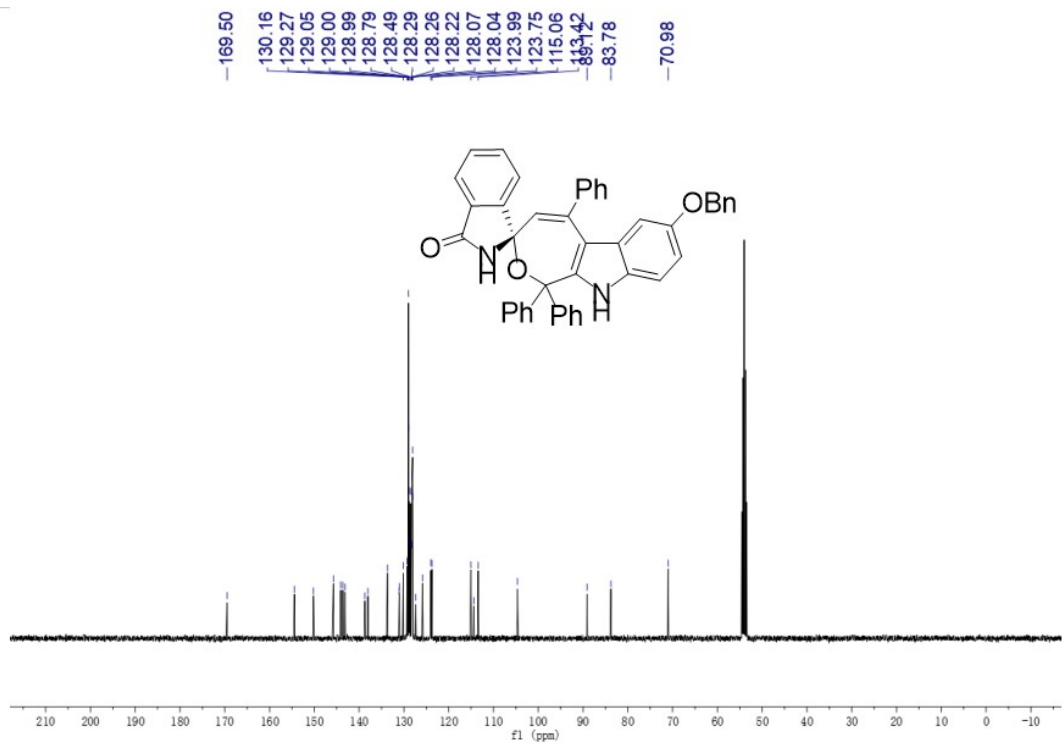

<sup>1</sup>H NMR (400 MHz, CD<sub>2</sub>Cl<sub>2</sub>) of **3q**

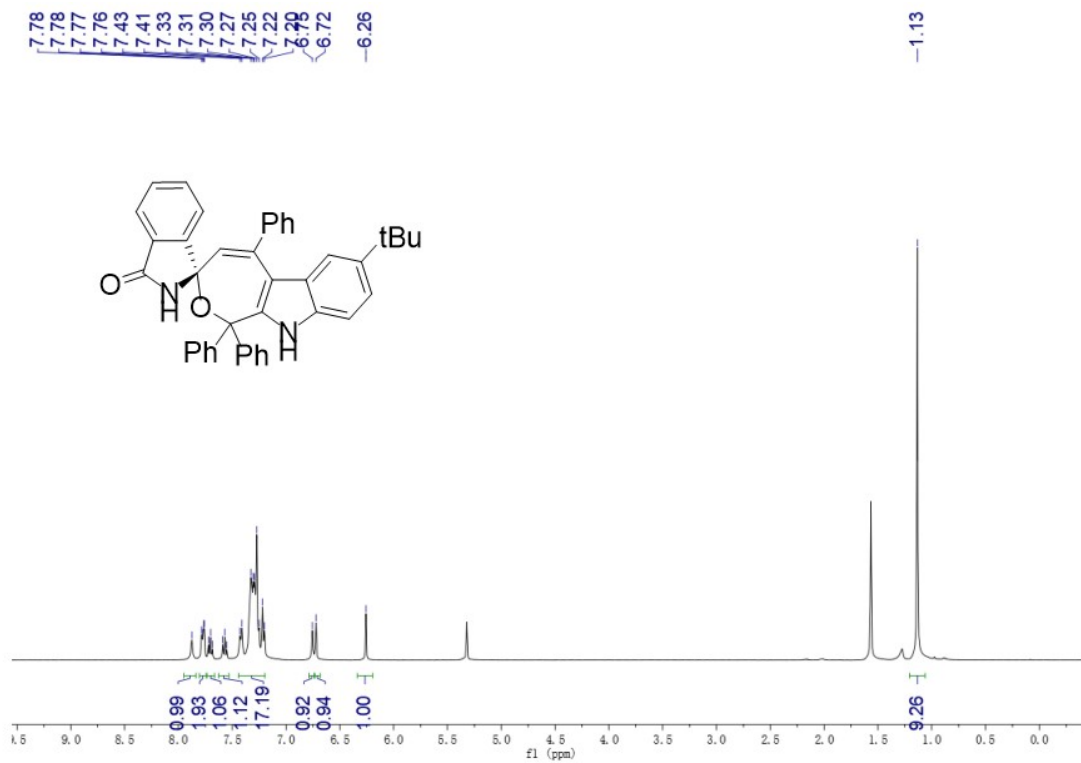

<sup>13</sup>C NMR (101 MHz, CD<sub>2</sub>Cl<sub>2</sub>) of 3q

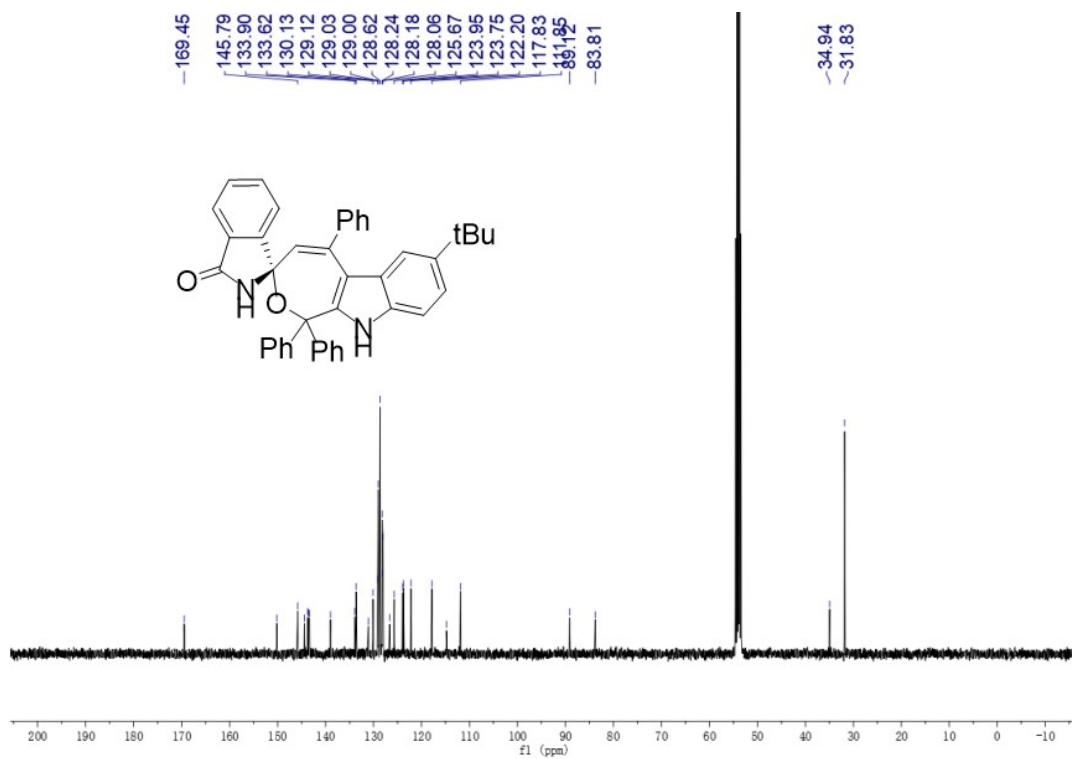

<sup>1</sup>H NMR (400 MHz, CD<sub>2</sub>Cl<sub>2</sub>) of 3r

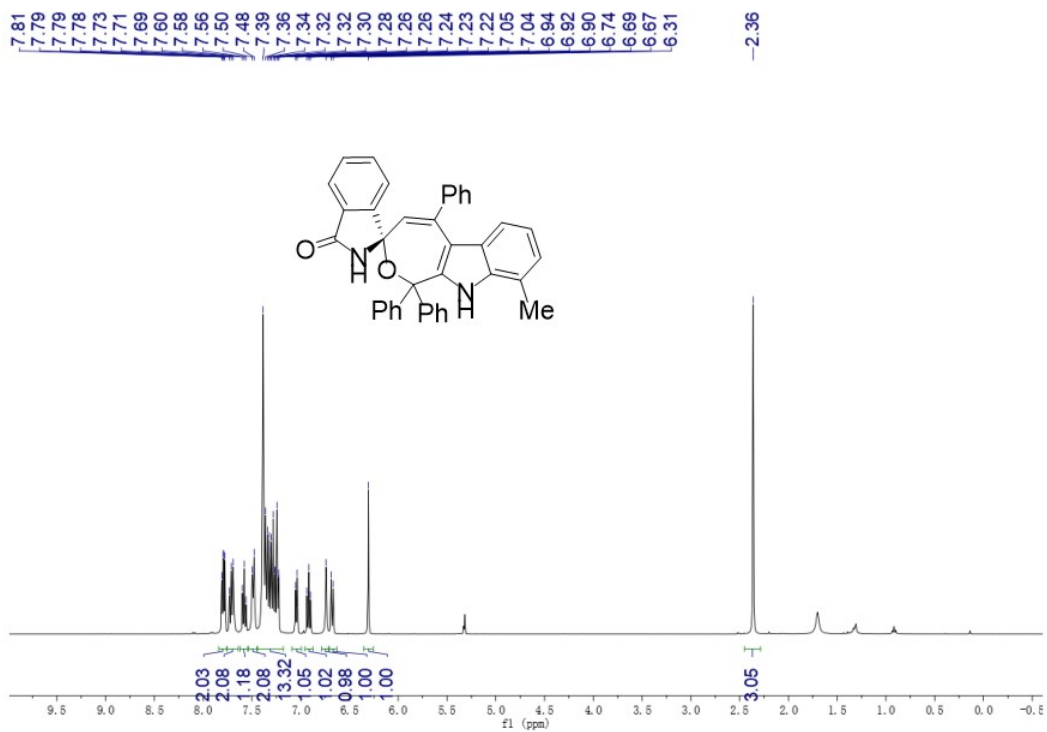

<sup>13</sup>C NMR (101 MHz, CD<sub>2</sub>Cl<sub>2</sub>) of **3r**

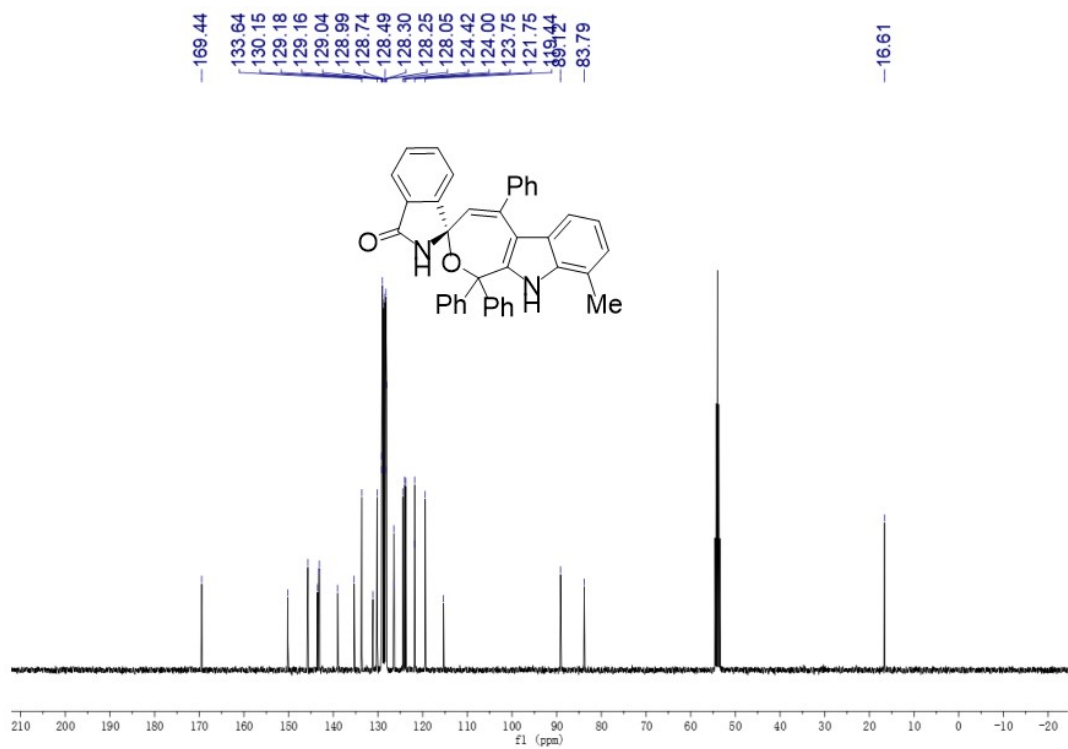

<sup>1</sup>H NMR (400 MHz, CD<sub>2</sub>Cl<sub>2</sub>) of **3s**

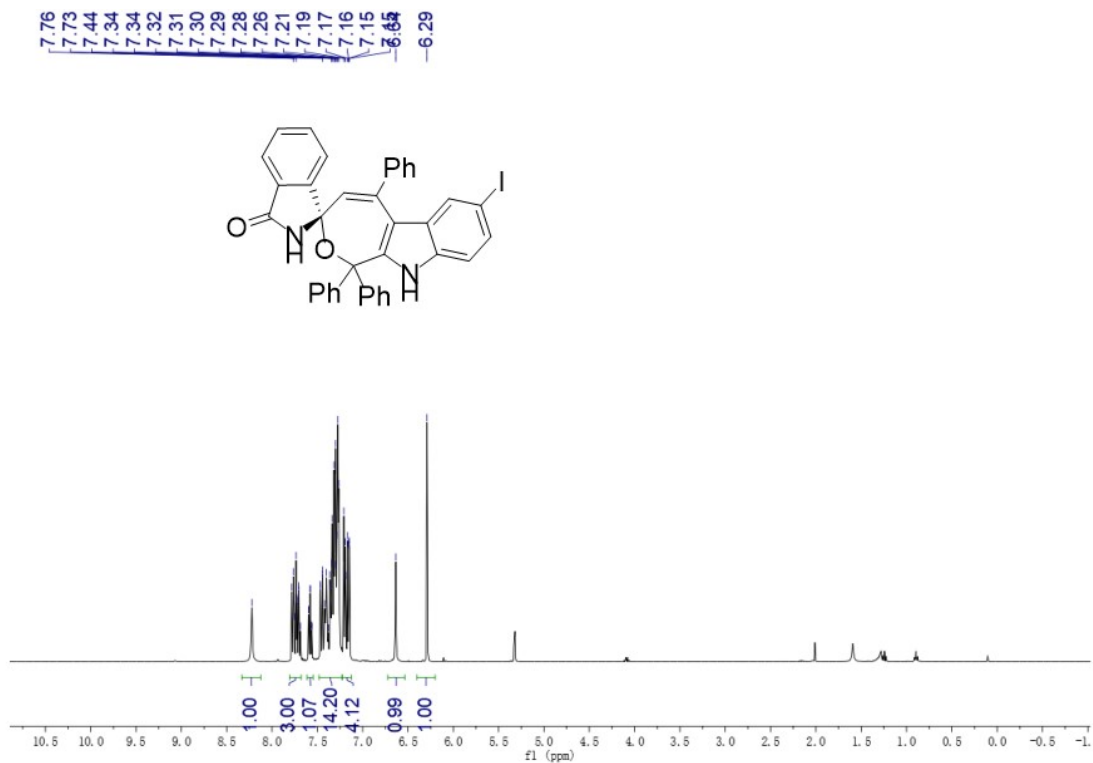

$^{13}\text{C}$  NMR (101 MHz,  $\text{CD}_2\text{Cl}_2$ ) of **3s**

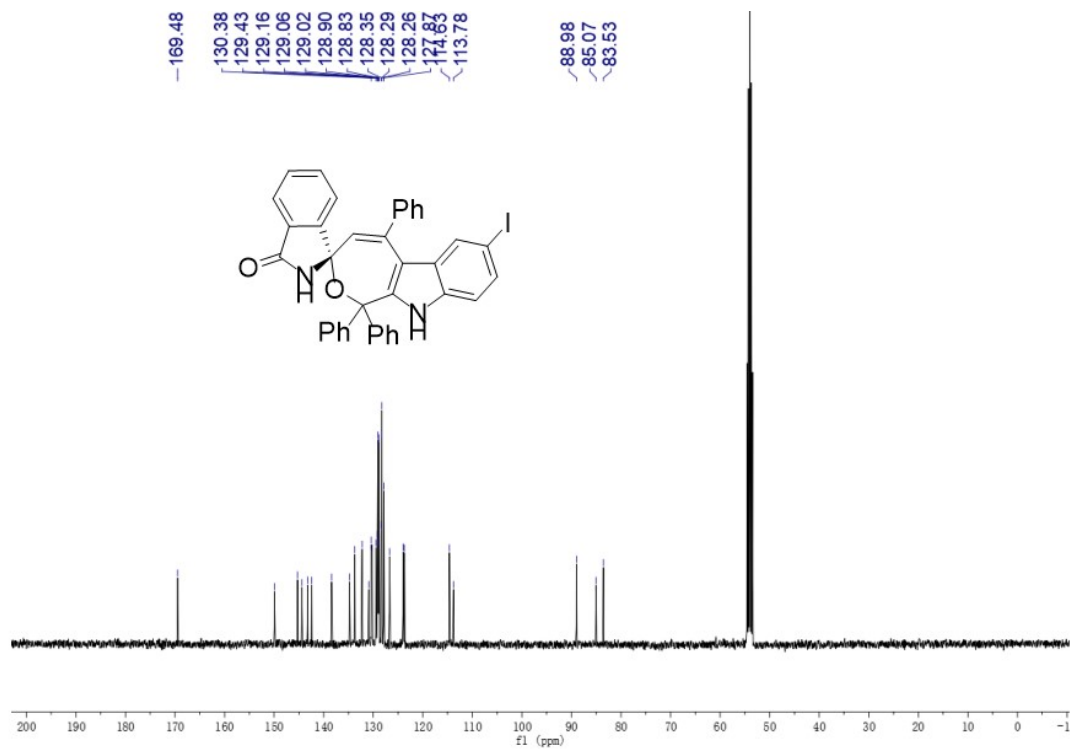

$^1\text{H}$  NMR (400 MHz,  $\text{CD}_2\text{Cl}_2$ ) of **3t**

8.00  
7.70  
7.68  
7.65  
7.63  
7.62  
7.61  
7.61  
7.59  
7.59  
7.50  
7.50  
7.48  
7.48  
7.47  
7.46  
7.33  
7.33  
7.31  
7.28  
7.28  
7.26  
7.26  
7.25  
7.22  
7.22  
7.21  
7.21  
7.20  
7.20  
7.20  
7.19  
7.18  
7.16  
7.11  
7.09  
7.09  
6.83  
6.83  
6.55  
6.19

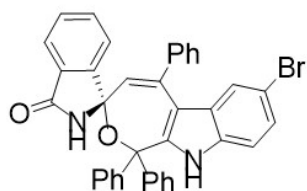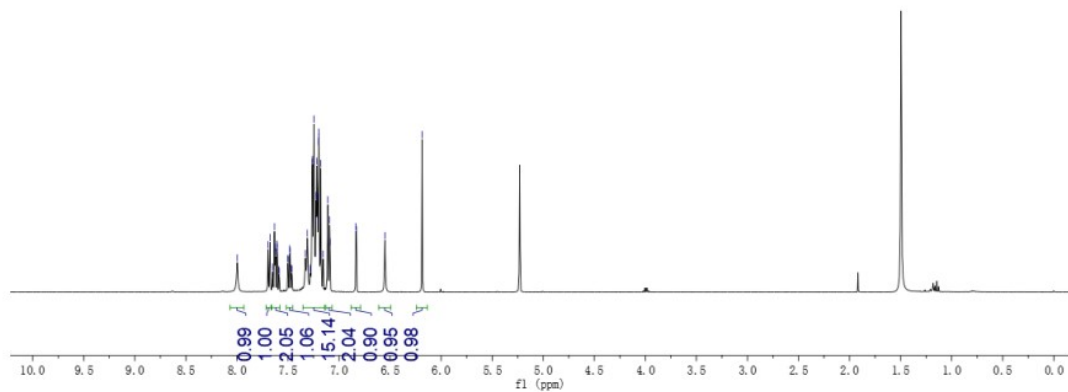

$^{13}\text{C}$  NMR (101 MHz,  $\text{CD}_2\text{Cl}_2$ ) of **3t**

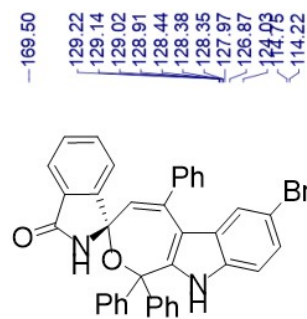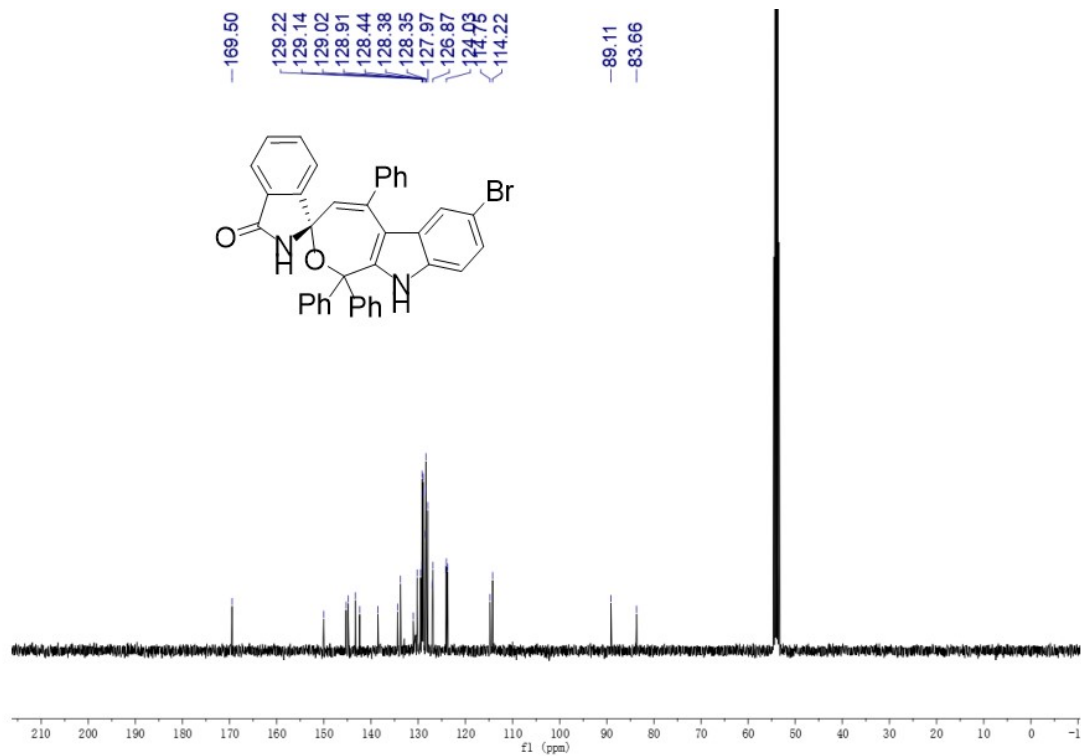

$^1\text{H}$  NMR (400 MHz,  $\text{CD}_2\text{Cl}_2$ ) of **3u**



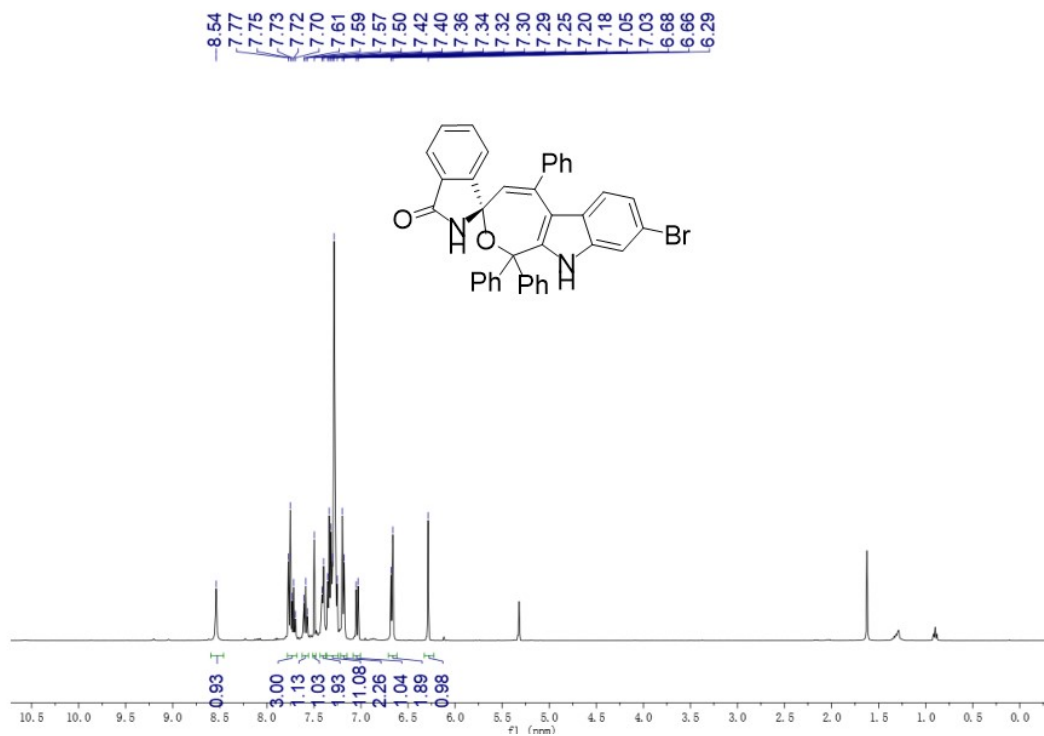

<sup>13</sup>C NMR (101 MHz, CD<sub>2</sub>Cl<sub>2</sub>) of **3u**

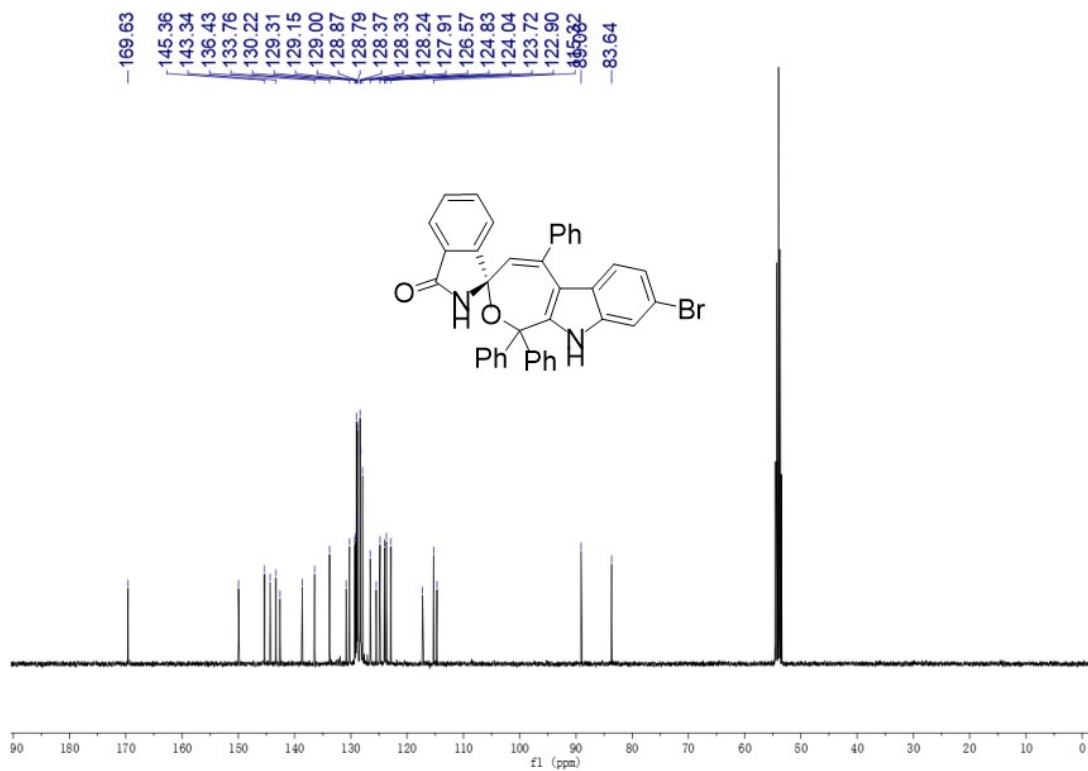

<sup>1</sup>H NMR (400 MHz, CD<sub>2</sub>Cl<sub>2</sub>) of **3v**

8.03  
7.69  
7.67  
7.65  
7.63  
7.62  
7.62  
7.61  
7.60  
7.59  
7.58  
7.50  
7.50  
7.48  
7.48  
7.46  
7.46  
7.33  
7.31  
7.28  
7.27  
7.26  
7.26  
7.24  
7.24  
7.23  
7.22  
7.22  
7.21  
7.21  
7.20  
7.18  
7.18  
7.17  
7.11  
7.09  
7.09  
7.08  
7.07  
7.06  
7.06  
6.67  
6.67  
6.55  
6.18

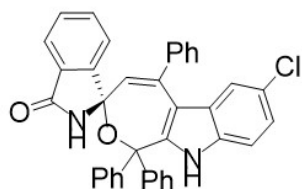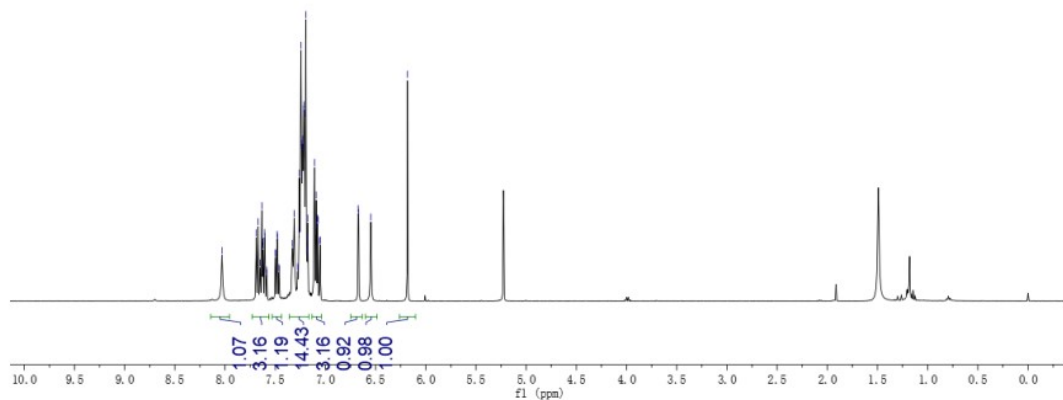

$^{13}\text{C}$  NMR (101 MHz,  $\text{CD}_2\text{Cl}_2$ ) of **3v**

169.51  
145.03  
142.49  
134.15  
133.74  
130.24  
129.47  
129.21  
129.12  
129.01  
128.92  
128.43  
128.39  
128.34  
127.98  
126.87  
124.30  
124.04  
123.75  
120.97  
83.85  
83.12  
83.69

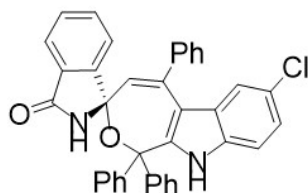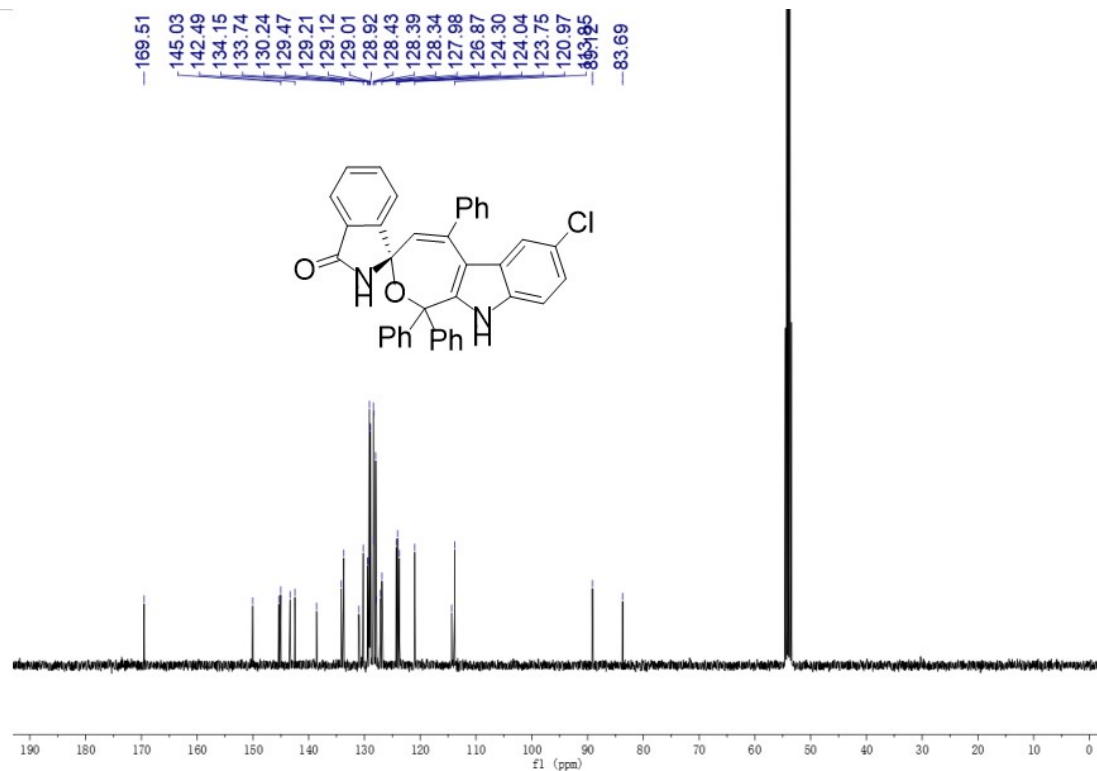

$^1\text{H}$  NMR (400 MHz,  $\text{CD}_2\text{Cl}_2$ ) of **3w**

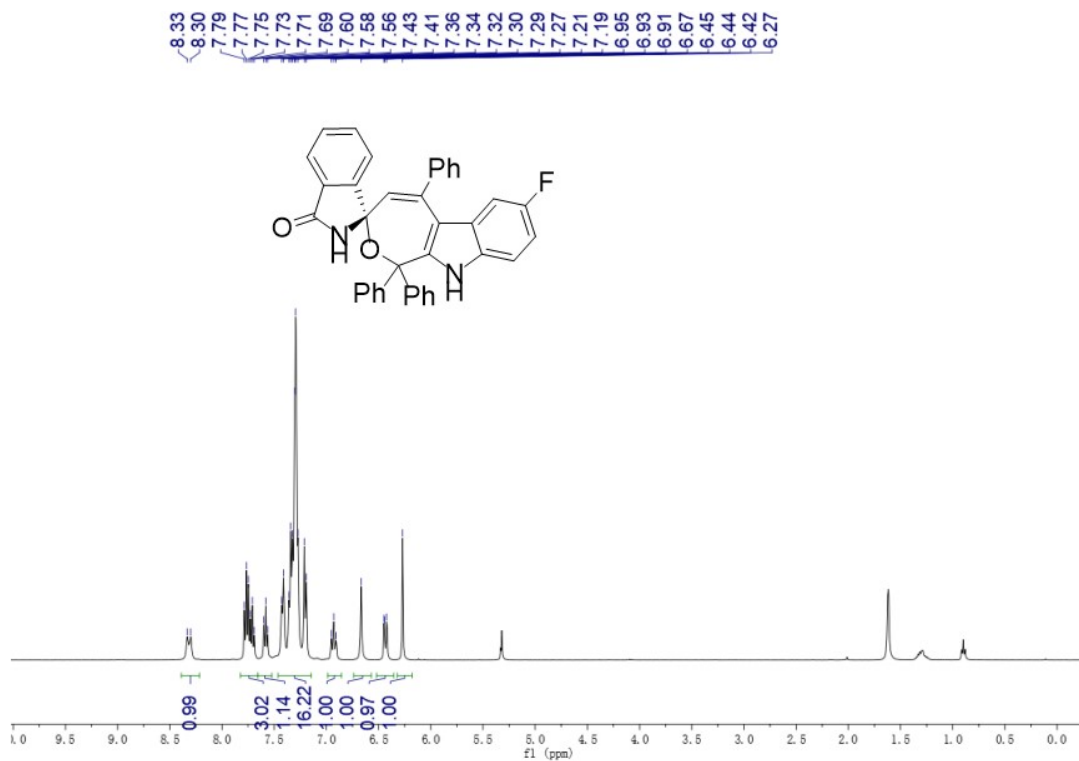

<sup>13</sup>C NMR (101 MHz, CD<sub>2</sub>Cl<sub>2</sub>) of **3w**

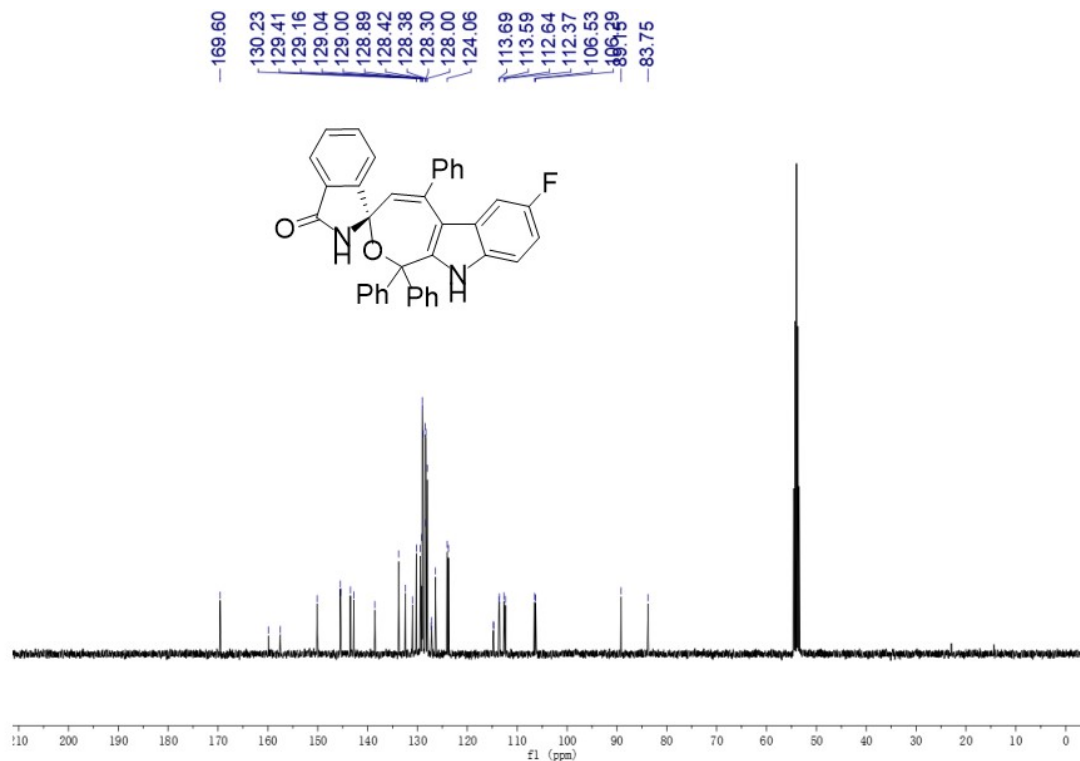

<sup>19</sup>F NMR (376 MHz, CD<sub>2</sub>Cl<sub>2</sub>) of **3w**

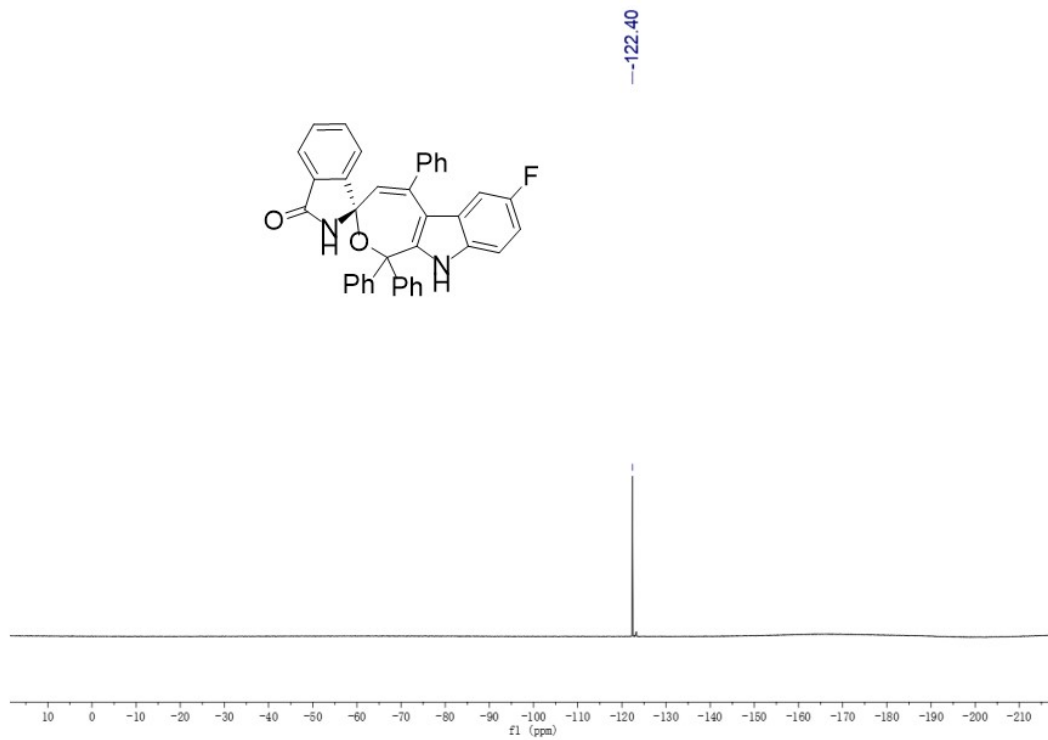

$^1\text{H}$  NMR (400 MHz,  $\text{CD}_2\text{Cl}_2$ ) of **3x**

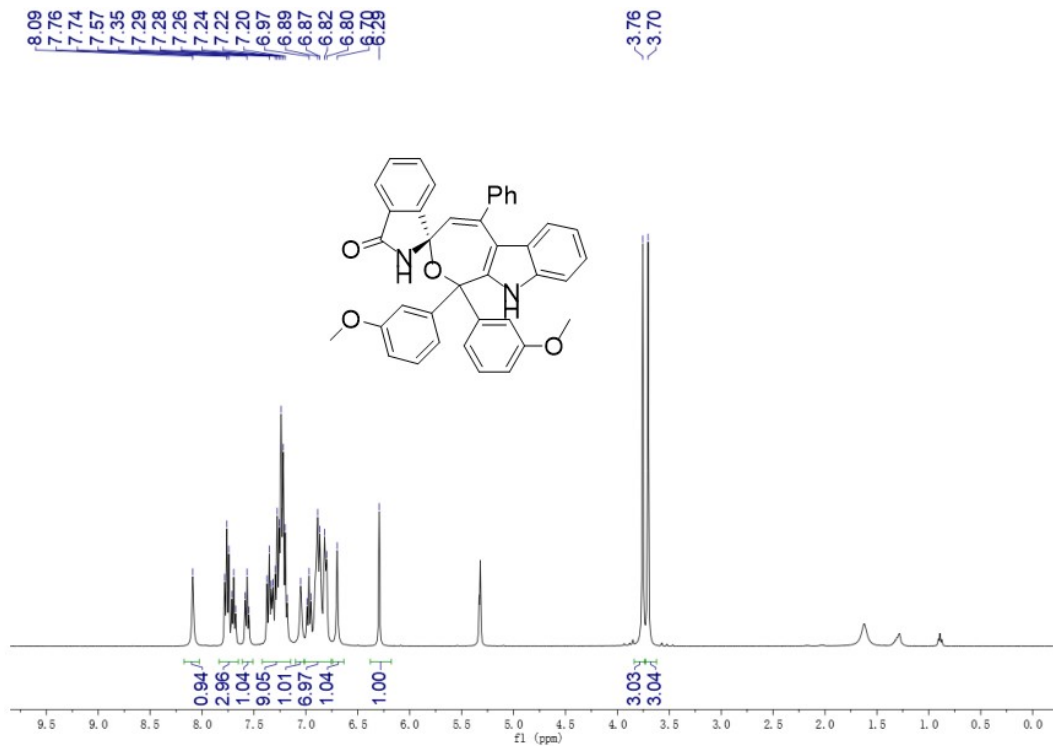

$^{13}\text{C}$  NMR (101 MHz,  $\text{CD}_2\text{Cl}_2$ ) of **3x**

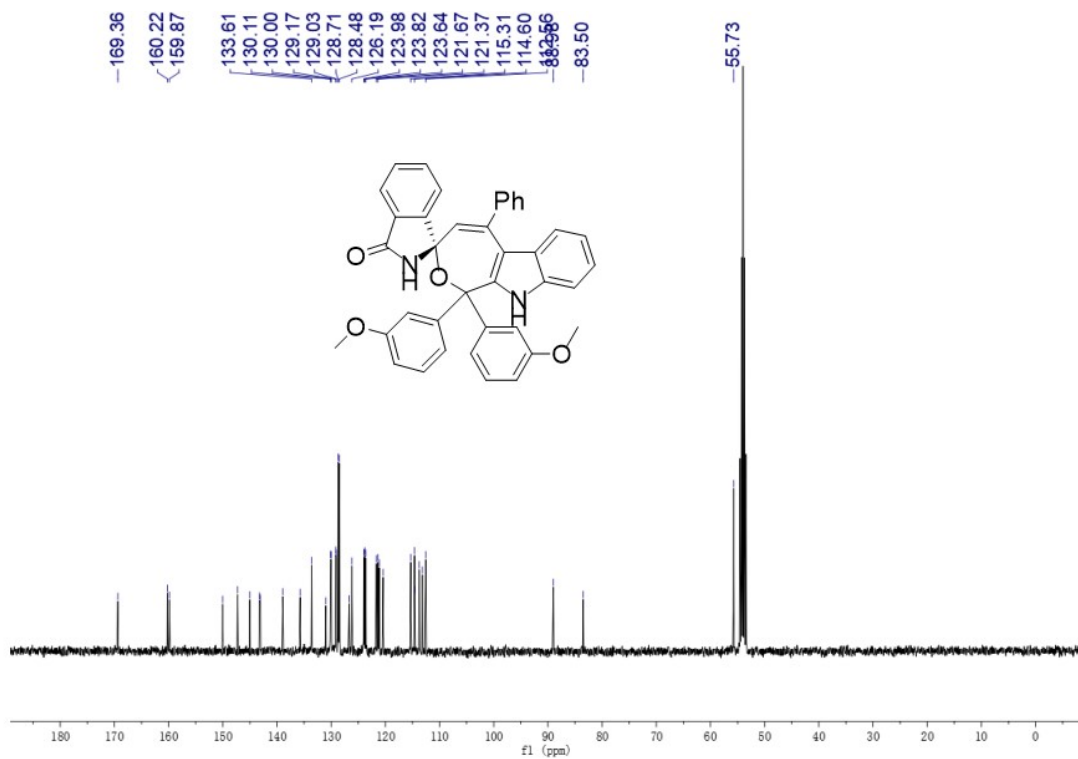

<sup>1</sup>H NMR (400 MHz, CD<sub>2</sub>Cl<sub>2</sub>) of **3y**

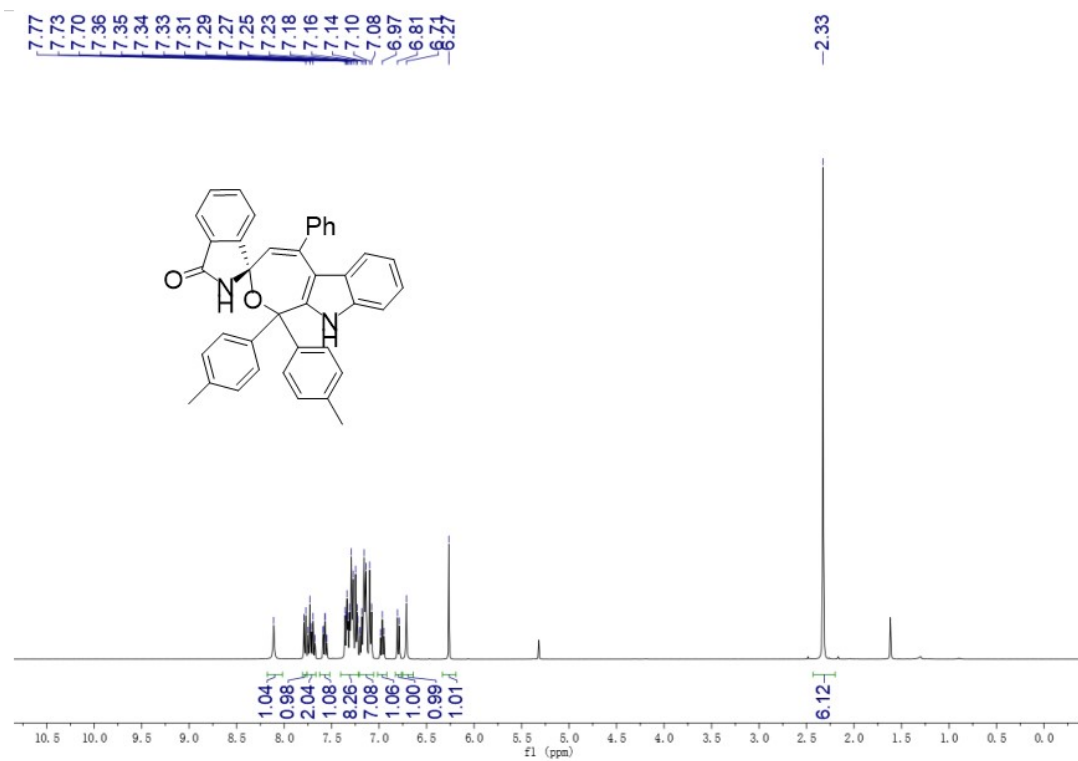

<sup>13</sup>C NMR (101 MHz, CD<sub>2</sub>Cl<sub>2</sub>) of **3y**

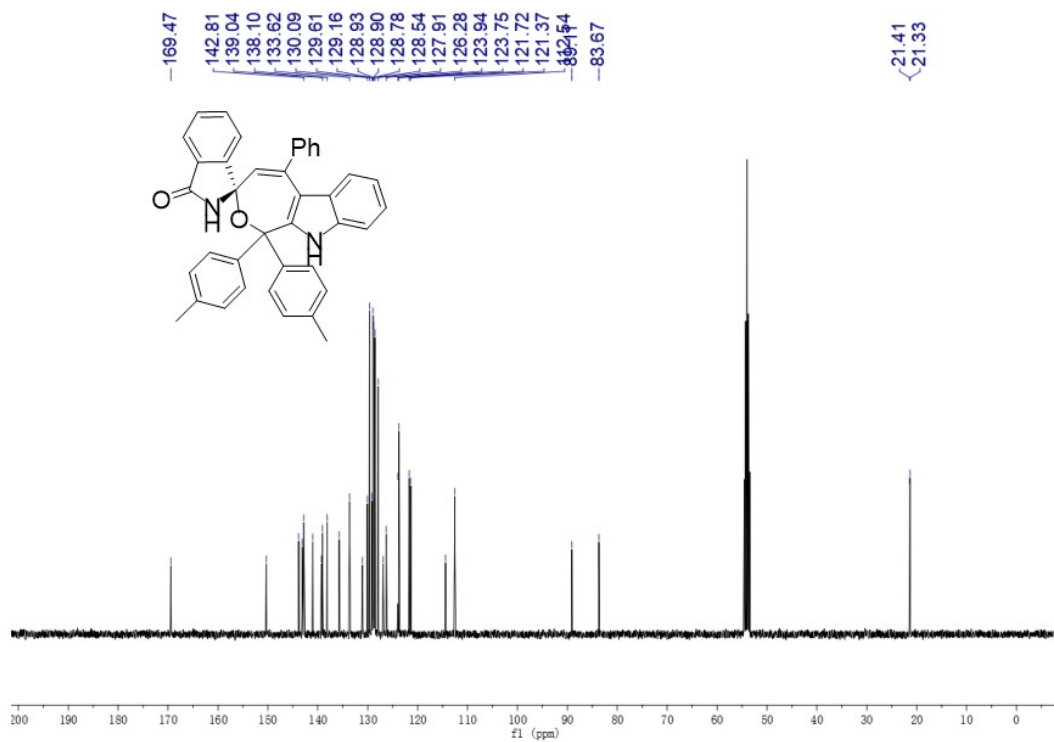

<sup>1</sup>H NMR (400 MHz, CD<sub>2</sub>Cl<sub>2</sub>) of **3z**

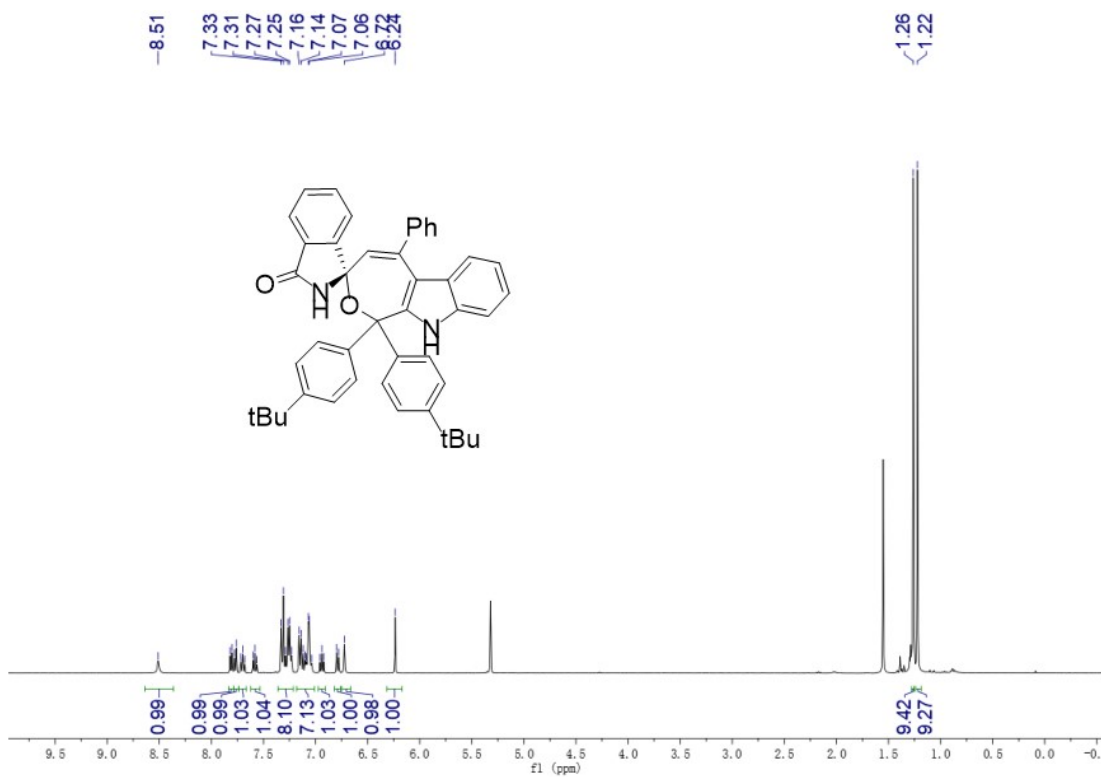

<sup>13</sup>C NMR (101 MHz, CD<sub>2</sub>Cl<sub>2</sub>) of **3z**

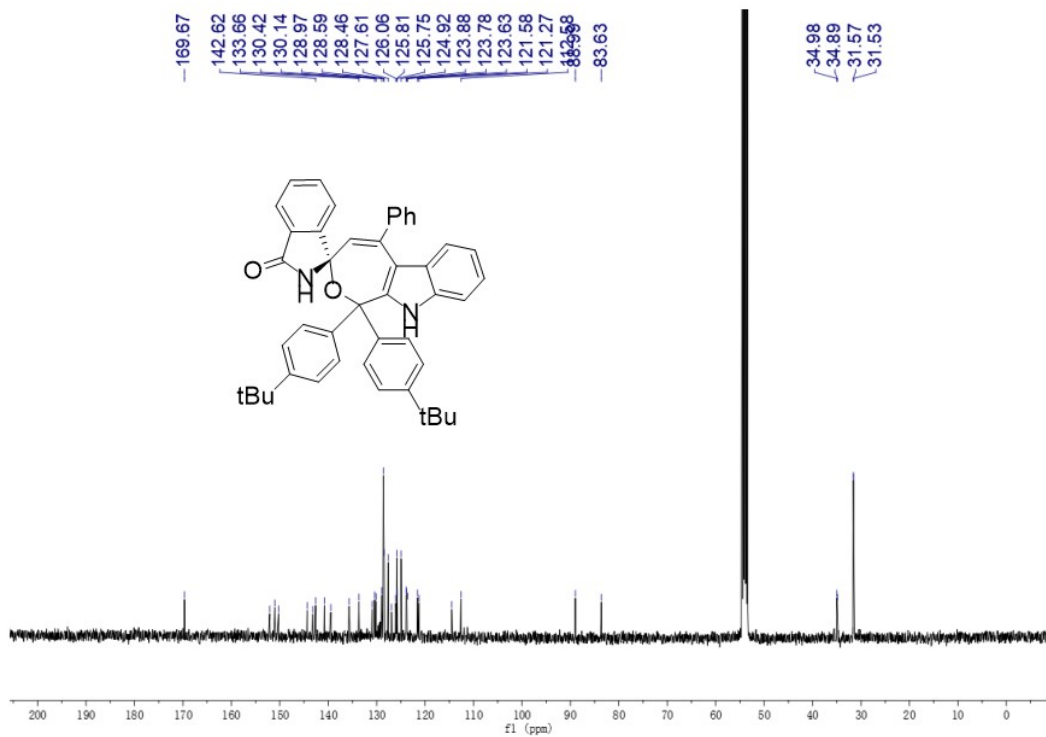

<sup>1</sup>H NMR (400 MHz, CD<sub>2</sub>Cl<sub>2</sub>) of **3aa**

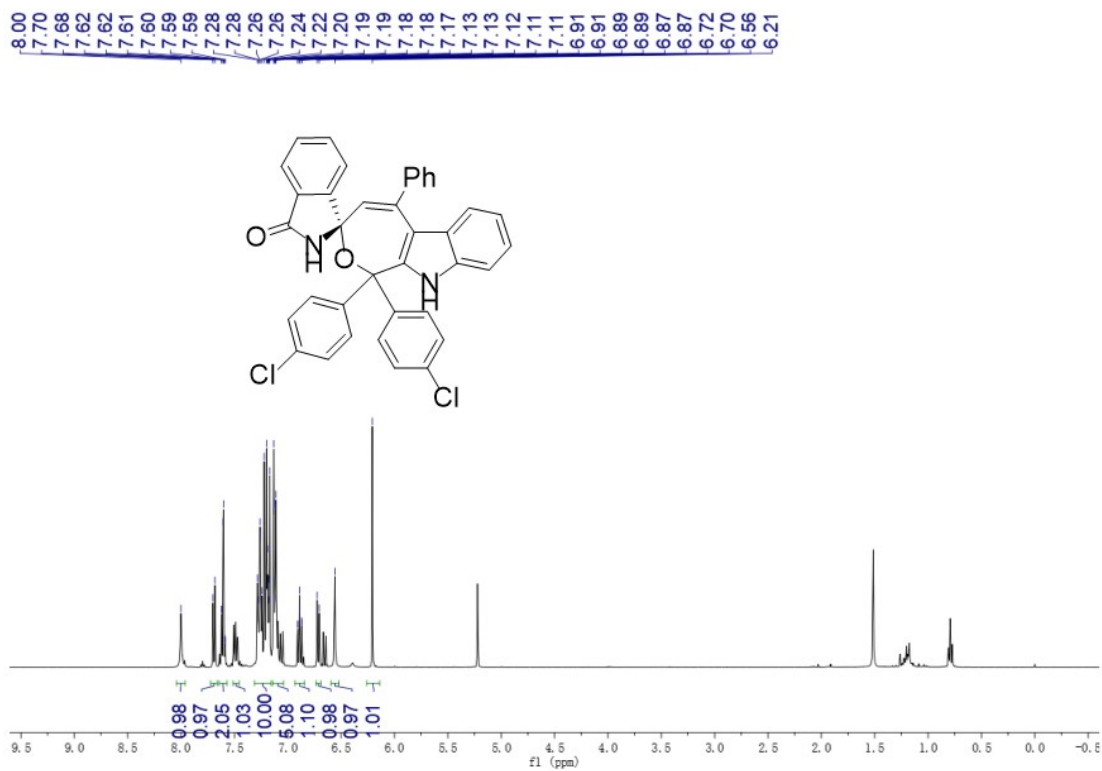

<sup>13</sup>C NMR (101 MHz, CD<sub>2</sub>Cl<sub>2</sub>) of **3aa**

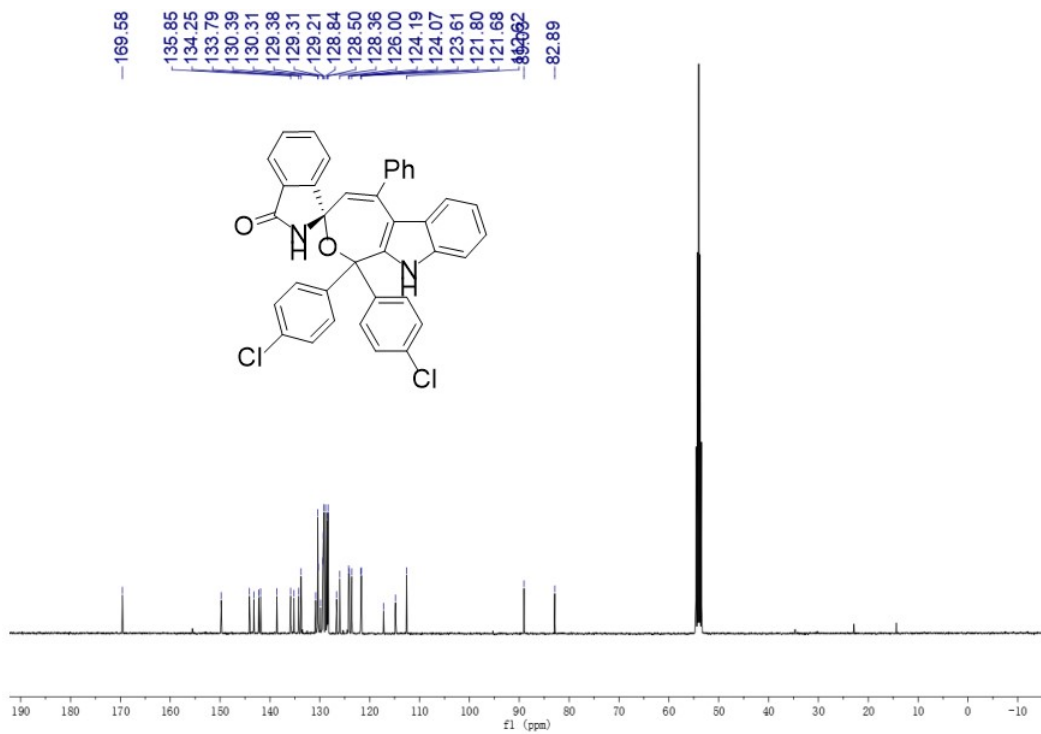

<sup>1</sup>H NMR (400 MHz, CD<sub>2</sub>Cl<sub>2</sub>) of **3ab**

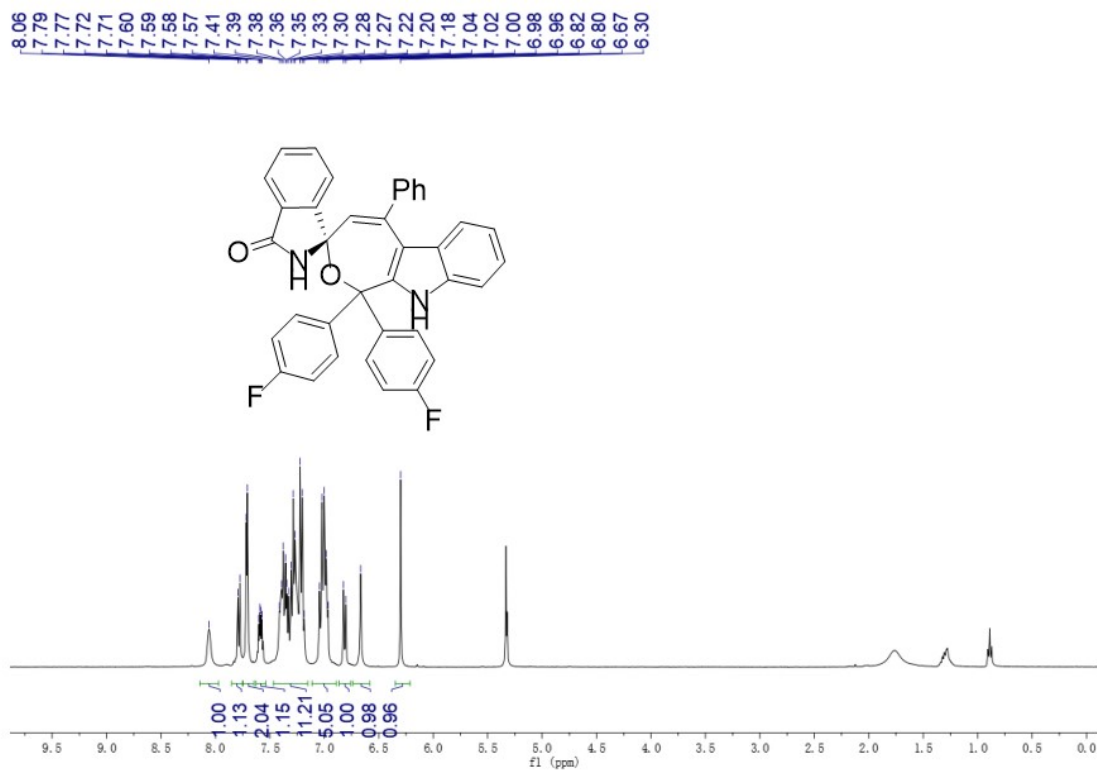

<sup>13</sup>C NMR (101 MHz, CD<sub>2</sub>Cl<sub>2</sub>) of **3ab**



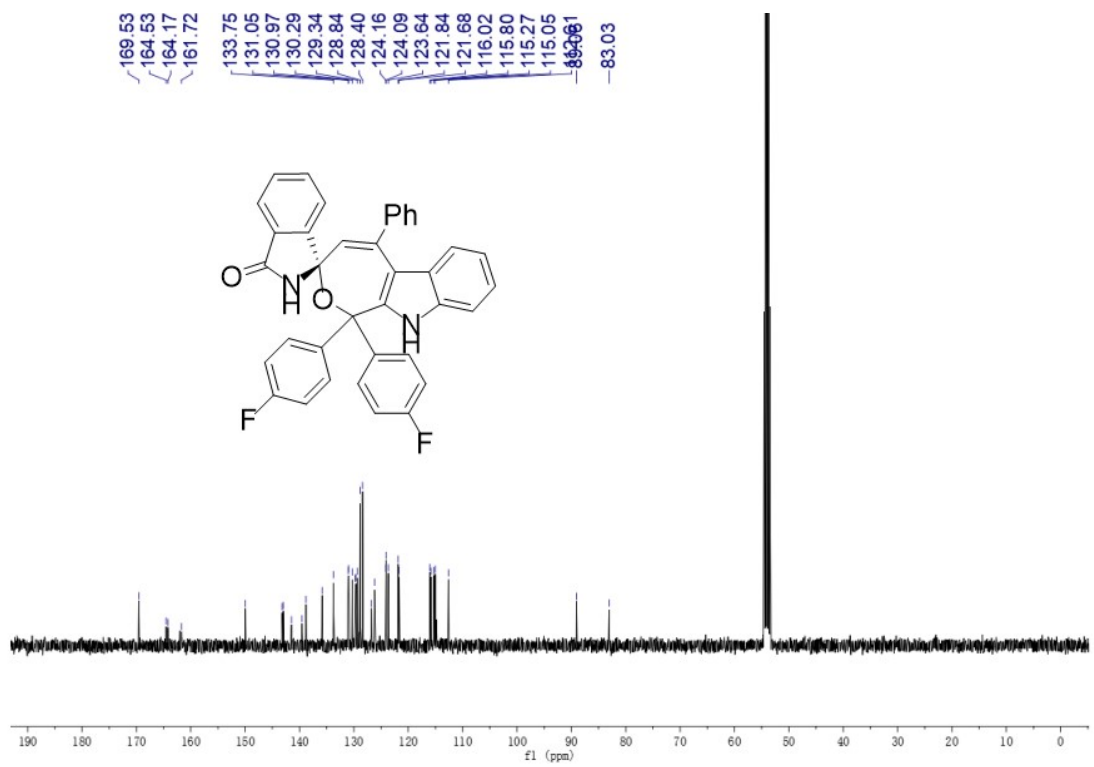

$^{13}\text{C}$  NMR (376MHz,  $\text{CD}_2\text{Cl}_2$ ) of **3ab**

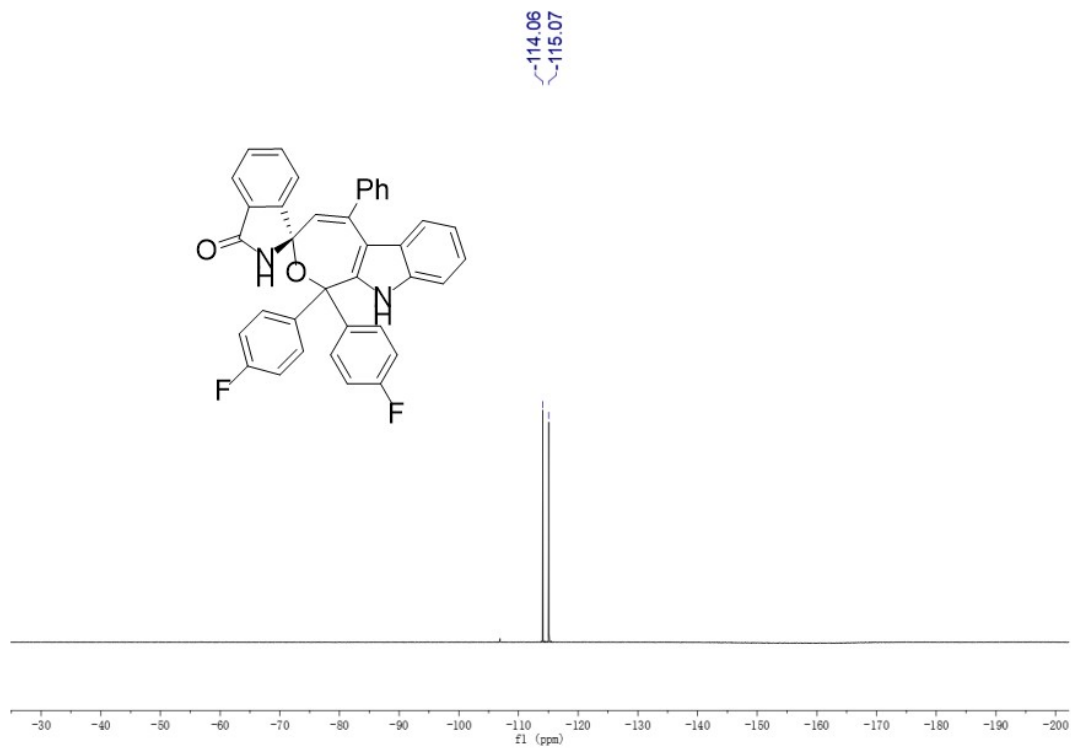

$^{19}\text{F}$  NMR (400 MHz,  $\text{CD}_2\text{Cl}_2$ ) of **5**

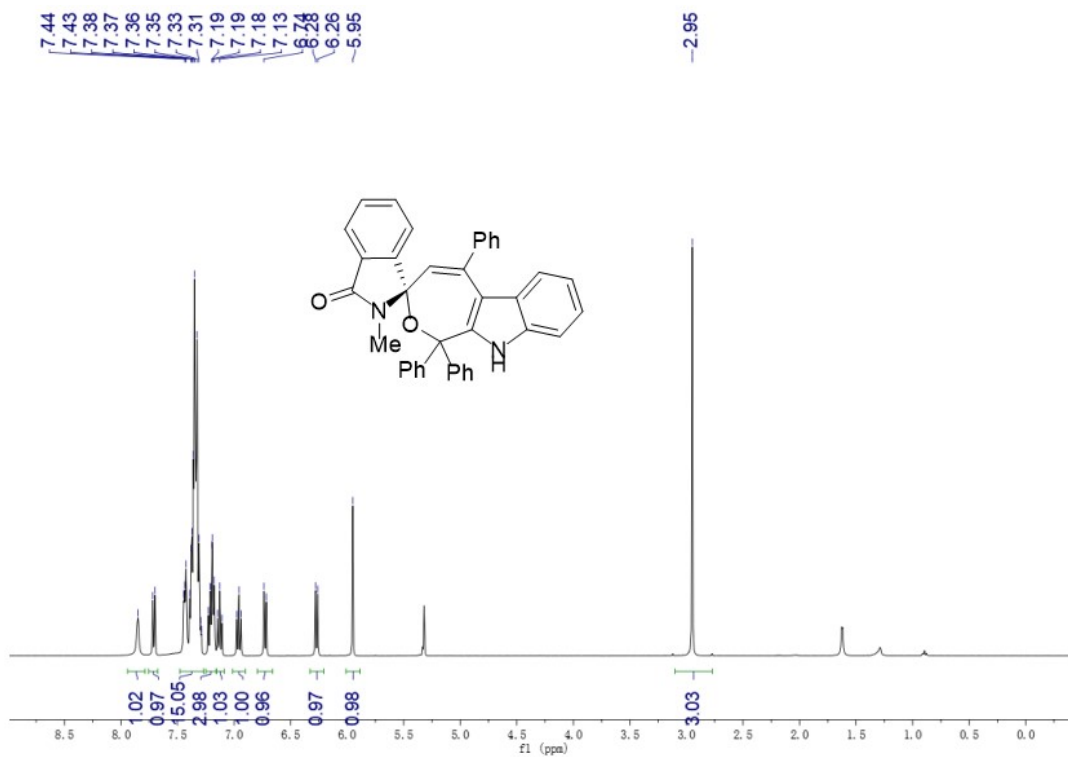

<sup>13</sup>C NMR (400 MHz, CD<sub>2</sub>Cl<sub>2</sub>) of 5

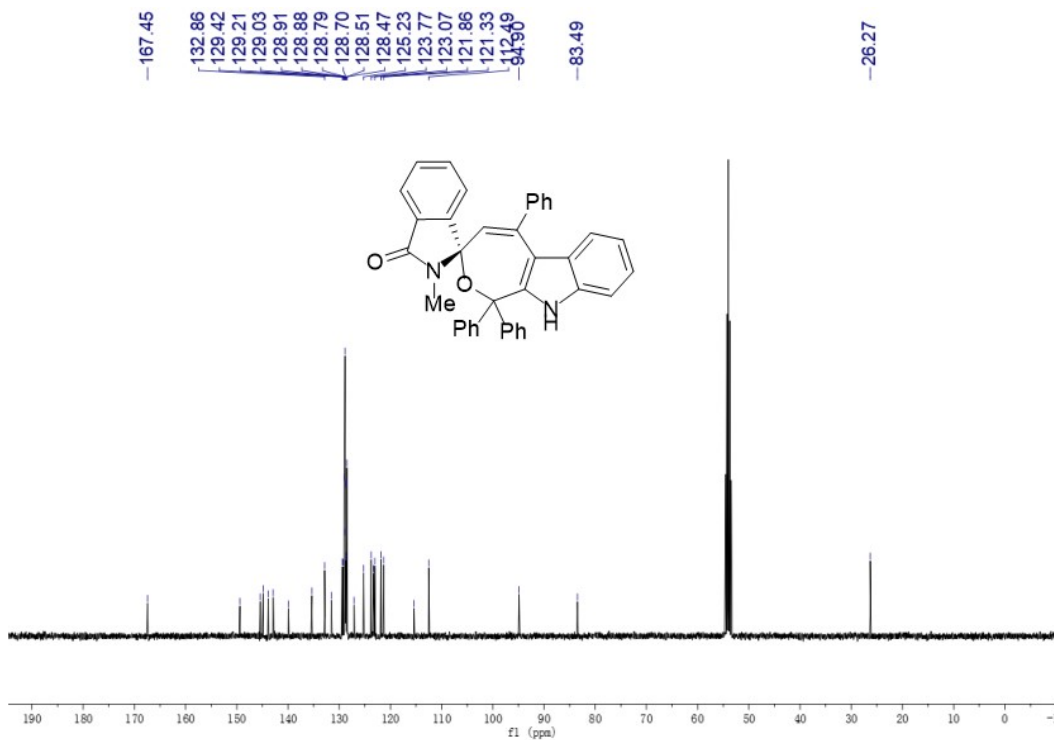

<sup>1</sup>H NMR (400 MHz, CD<sub>2</sub>Cl<sub>2</sub>) of 7

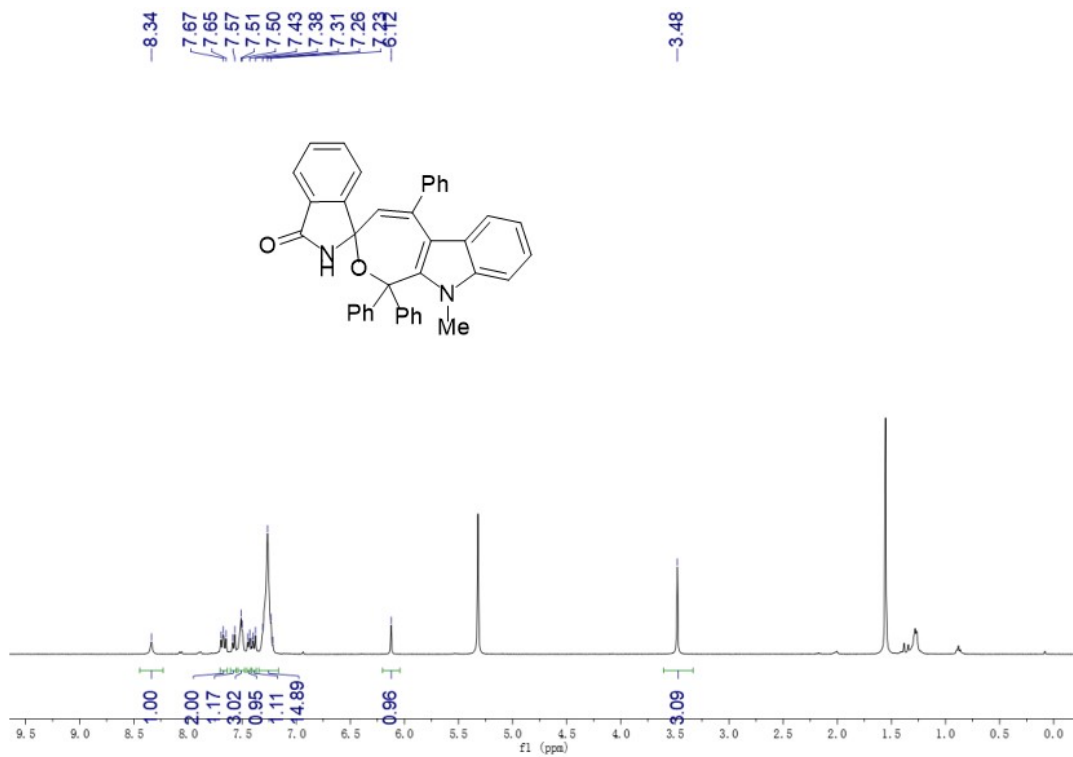

<sup>13</sup>C NMR (400 MHz, CD<sub>2</sub>Cl<sub>2</sub>) of **7**

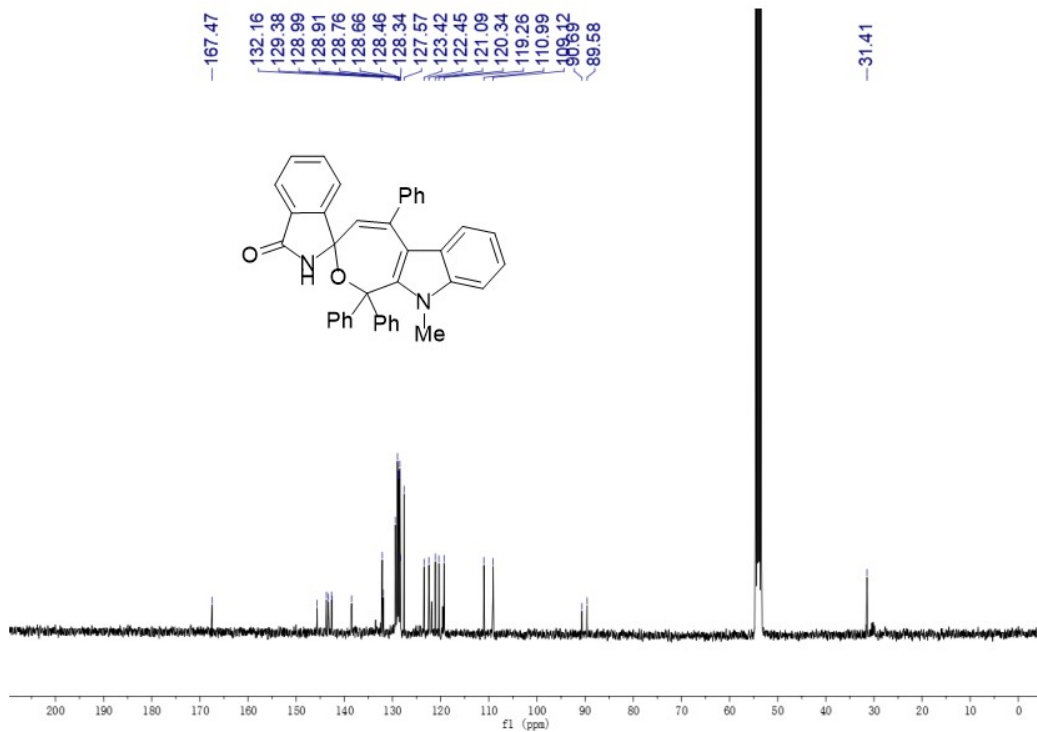

<sup>1</sup>H NMR (400 MHz, CD<sub>2</sub>Cl<sub>2</sub>) of **8**

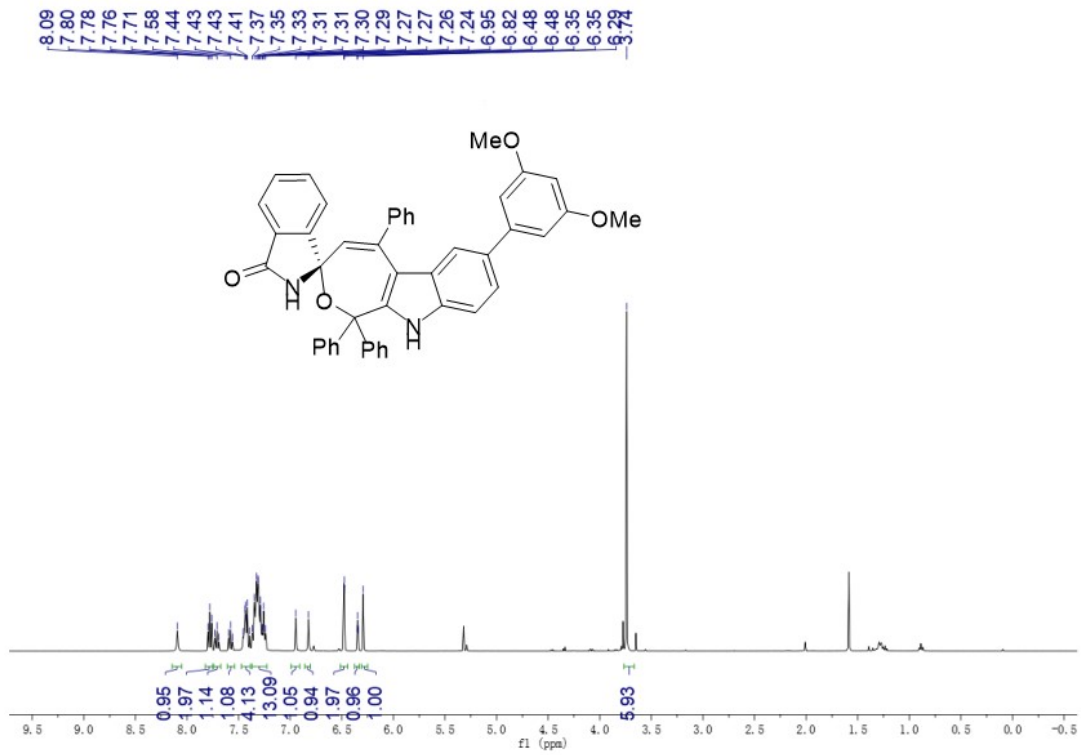

<sup>13</sup>C NMR (400 MHz, CD<sub>2</sub>Cl<sub>2</sub>) of **8**

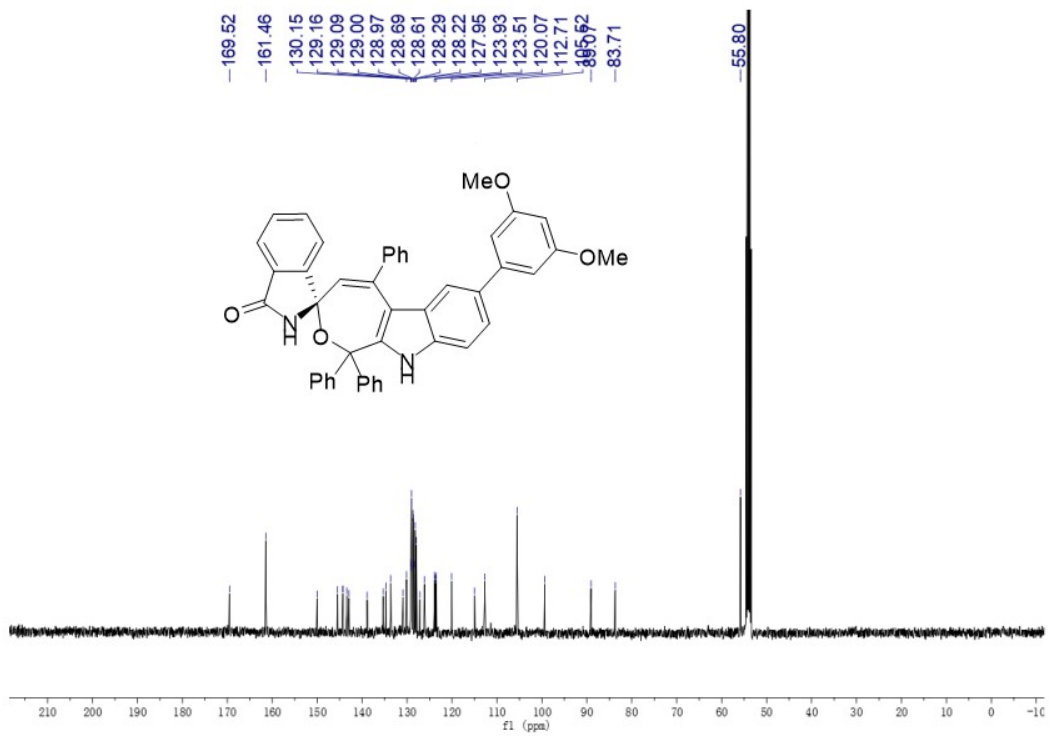

## 12. HPLC data

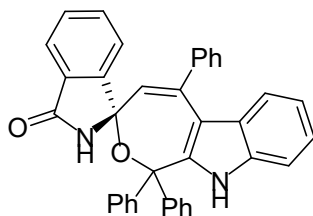

(S)-1',1',5'-triphenyl-1',10'-dihydrospiro[isoindoline-1,3'-oxepino[3,4-b]indol]-3-one  
(3a)

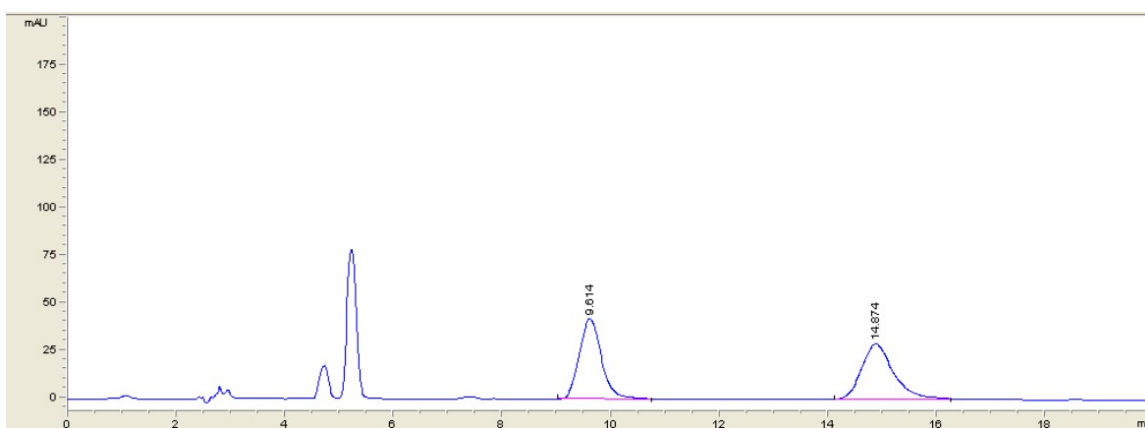

| # | Time   | Area   | Height | Width  | Area%  |
|---|--------|--------|--------|--------|--------|
| 1 | 9.614  | 1205.9 | 42.2   | 0.4438 | 50.330 |
| 2 | 14.874 | 1190.1 | 29.2   | 0.616  | 49.670 |

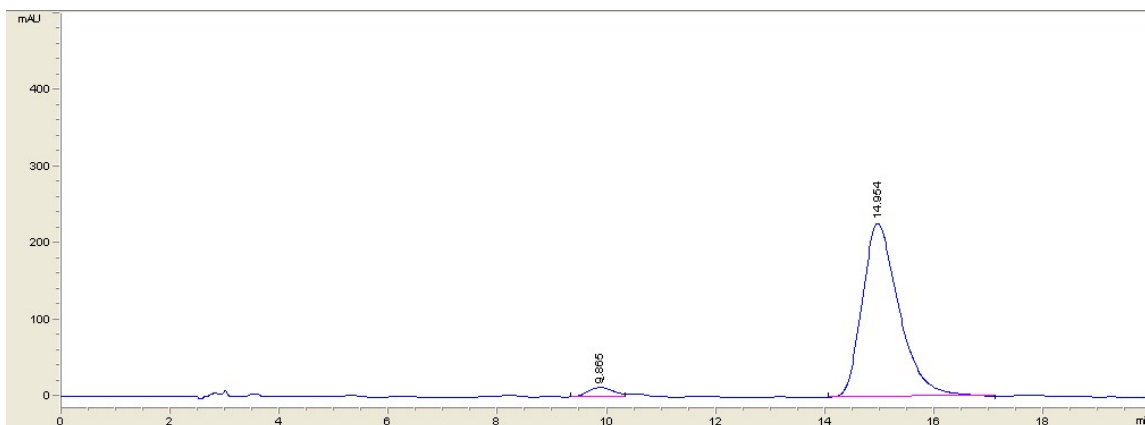

| # | Time   | Area  | Height | Width  | Area%  |
|---|--------|-------|--------|--------|--------|
| 1 | 9.865  | 431.5 | 12.7   | 0.5663 | 3.930  |
| 2 | 14.954 | 10548 | 225.8  | 0.7051 | 96.070 |

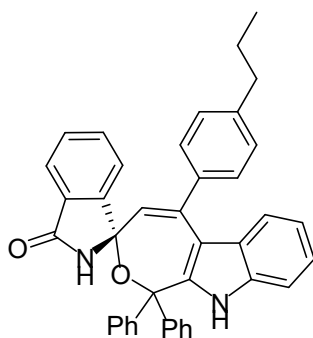

**(S)-1',1'-diphenyl-5'-(4-propylphenyl)-1',10'-dihydrospiro[isindoline-1,3'-oxepino[3,4-b]indol]-3-one (3b)**

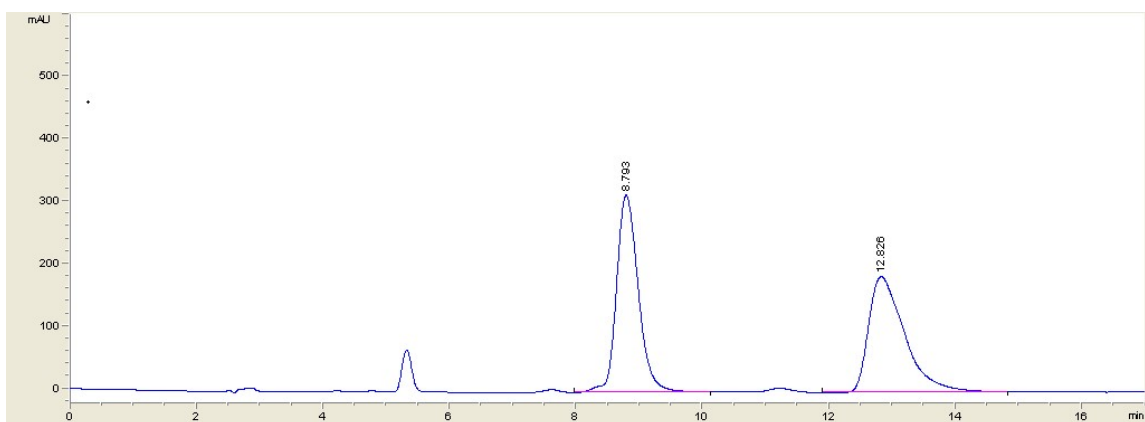

| # | Time   | Area   | Height | Width  | Area%  |
|---|--------|--------|--------|--------|--------|
| 1 | 8.793  | 7654.2 | 316    | 0.3758 | 50.884 |
| 2 | 12.826 | 7388.4 | 185.6  | 0.5808 | 49.116 |

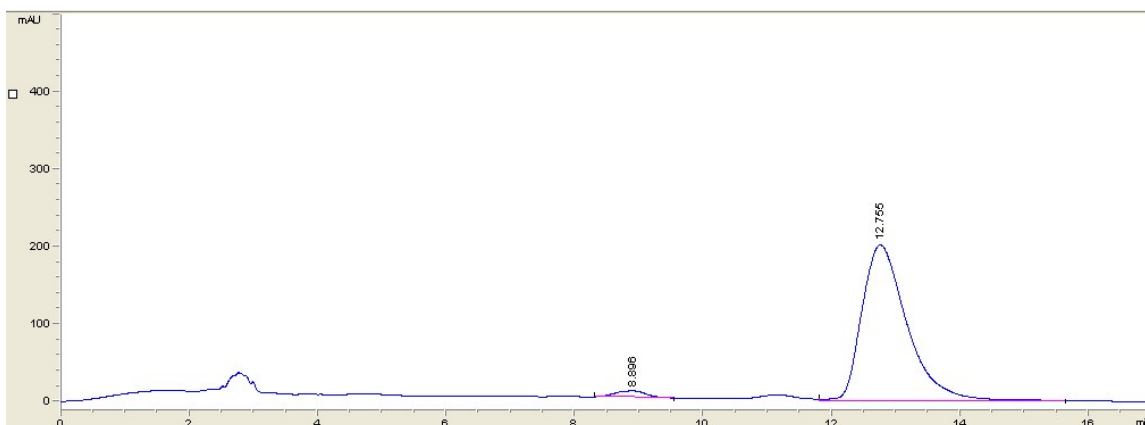

| # | Time   | Area   | Height | Width  | Area%  |
|---|--------|--------|--------|--------|--------|
| 1 | 8.896  | 315.9  | 8.9    | 0.59   | 3.111  |
| 2 | 12.755 | 9837.8 | 201.1  | 0.8152 | 96.889 |

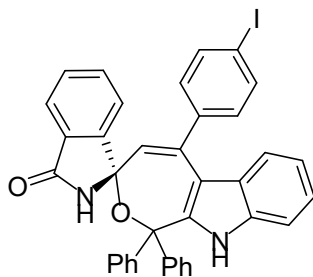

**(S)-5'-(4-iodophenyl)-1',1'-diphenyl-1',10'-dihydrospiro[isindoline-1,3'-oxepino[3,4-b]indol]-3-one (3c)**

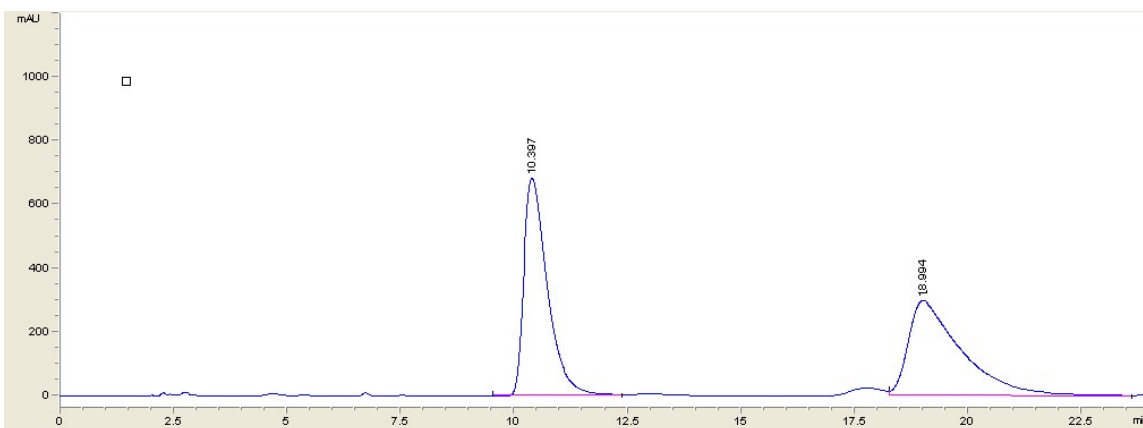

| # | Time   | Area    | Height | Width  | Area%  |
|---|--------|---------|--------|--------|--------|
| 1 | 10.397 | 24849   | 681.6  | 0.5563 | 50.476 |
| 2 | 18.994 | 24380.8 | 296.8  | 1.3689 | 49.524 |

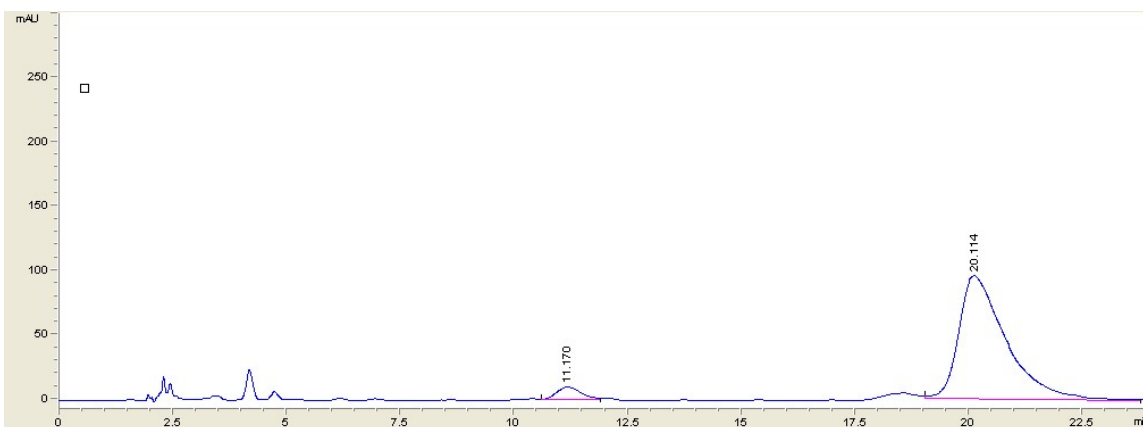

| # | Time   | Area   | Height | Width  | Area%  |
|---|--------|--------|--------|--------|--------|
| 1 | 11.17  | 368.6  | 9.8    | 0.6262 | 5.016  |
| 2 | 20.114 | 6980.9 | 96     | 1.2125 | 94.984 |

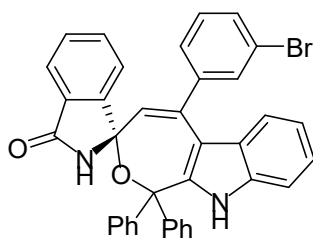

**(S)-5'-(3-bromophenyl)-1,1'-diphenyl-1',10'-dihydrospiro[isindoline-1,3'-oxepino[3,4-b]indol]-3-one (3d)**

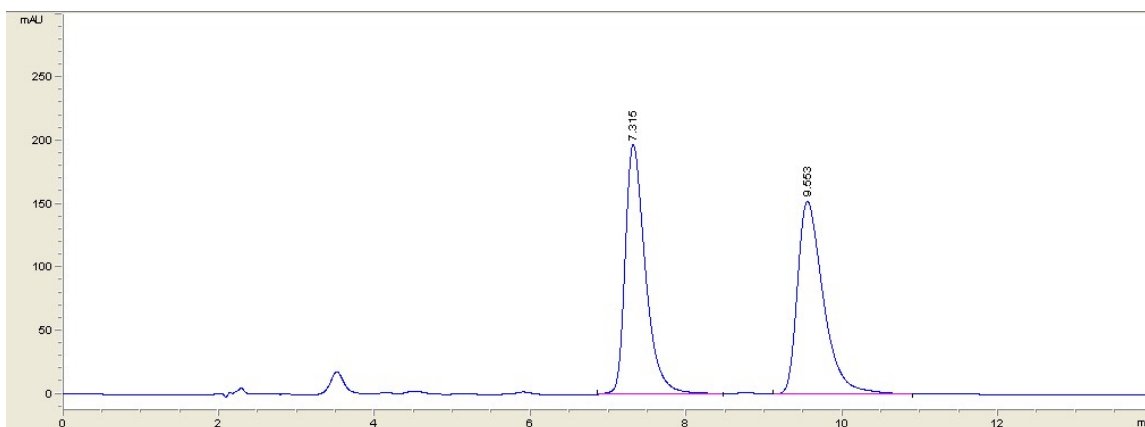

| # | Time  | Area   | Height | Width  | Area%  |
|---|-------|--------|--------|--------|--------|
| 1 | 7.315 | 3575.6 | 197.1  | 0.2728 | 50.504 |
| 2 | 9.553 | 3504.3 | 152    | 0.3534 | 49.496 |

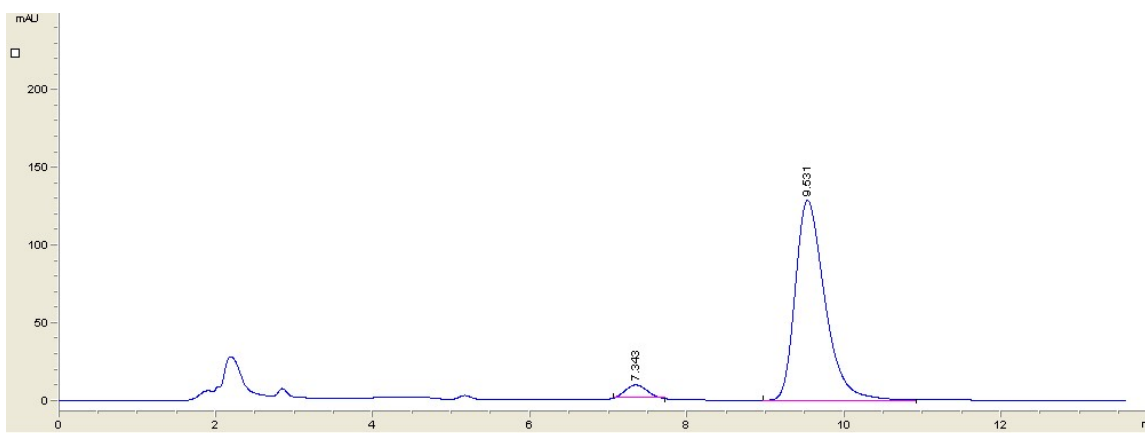

| # | Time  | Area   | Height | Width  | Area%  |
|---|-------|--------|--------|--------|--------|
| 1 | 7.343 | 164.1  | 8.5    | 0.3209 | 4.590  |
| 2 | 9.531 | 3410.5 | 129    | 0.4407 | 95.410 |



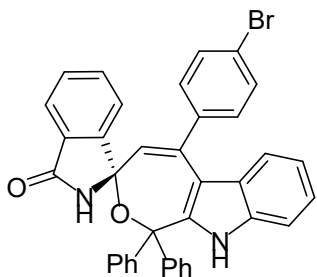

**(S)-5'-(4-bromophenyl)-1',1'-diphenyl-1',10'-dihydrospiro[isindoline-1,3'-oxepino[3,4-b]indol]-3-one (3e)**

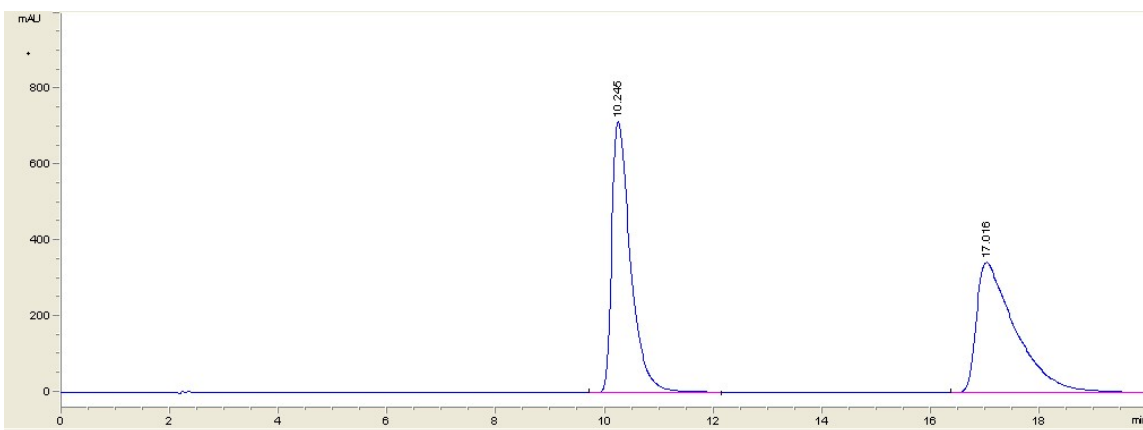

| # | Time   | Area    | Height | Width  | Area%  |
|---|--------|---------|--------|--------|--------|
| 1 | 10.245 | 17151.5 | 713.9  | 0.3647 | 50.090 |
| 2 | 17.016 | 17090   | 344    | 0.6816 | 49.910 |

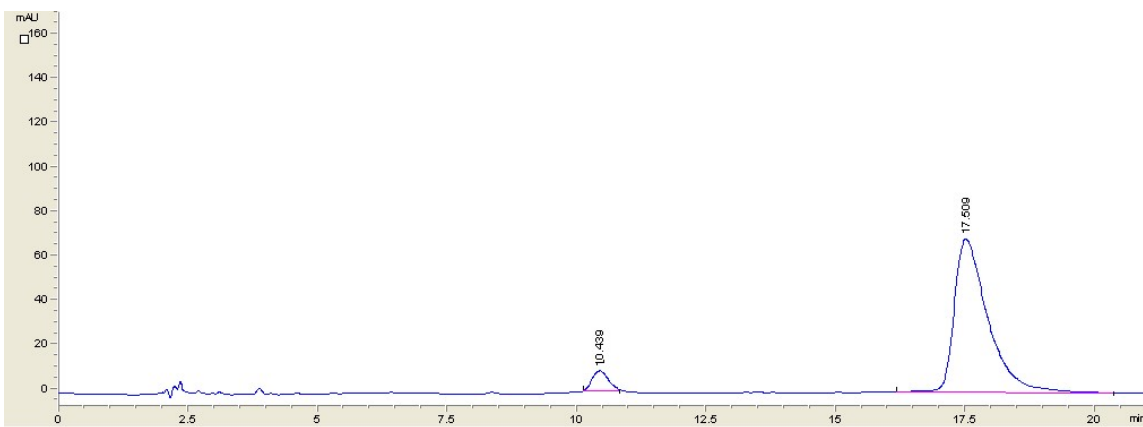

| # | Time   | Area   | Height | Width  | Area%  |
|---|--------|--------|--------|--------|--------|
| 1 | 10.439 | 196.4  | 9.1    | 0.3598 | 5.871  |
| 2 | 17.509 | 3149.3 | 69.2   | 0.7585 | 94.129 |

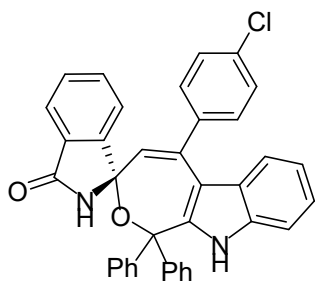

**(S)-5'-(4-chlorophenyl)-1',1'-diphenyl-1',10'-dihydrospiro[isindoline-1,3'-oxepino[3,4-b]indol]-3-one (3f)**

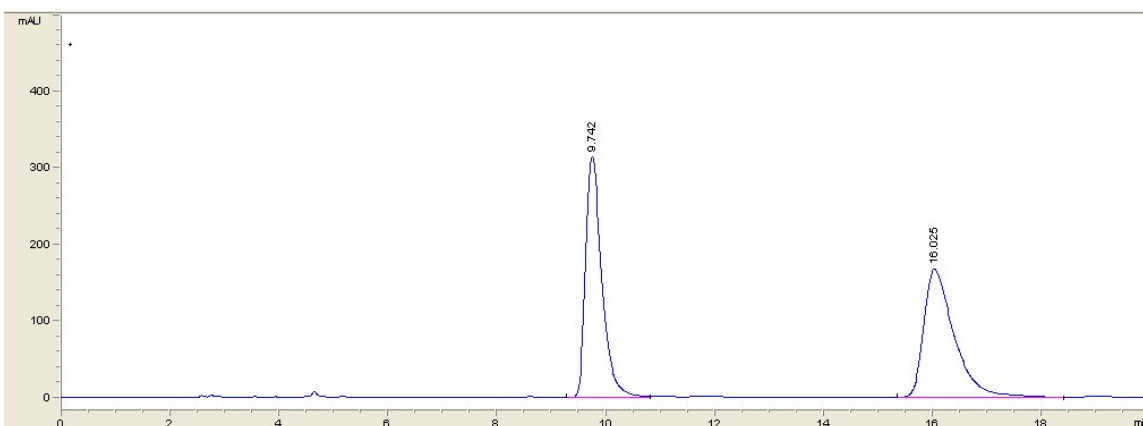

| # | Time   | Area   | Height | Width  | Area%  |
|---|--------|--------|--------|--------|--------|
| 1 | 9.742  | 6509.9 | 314.7  | 0.3141 | 50.001 |
| 2 | 16.025 | 6509.7 | 167.7  | 0.5751 | 49.999 |

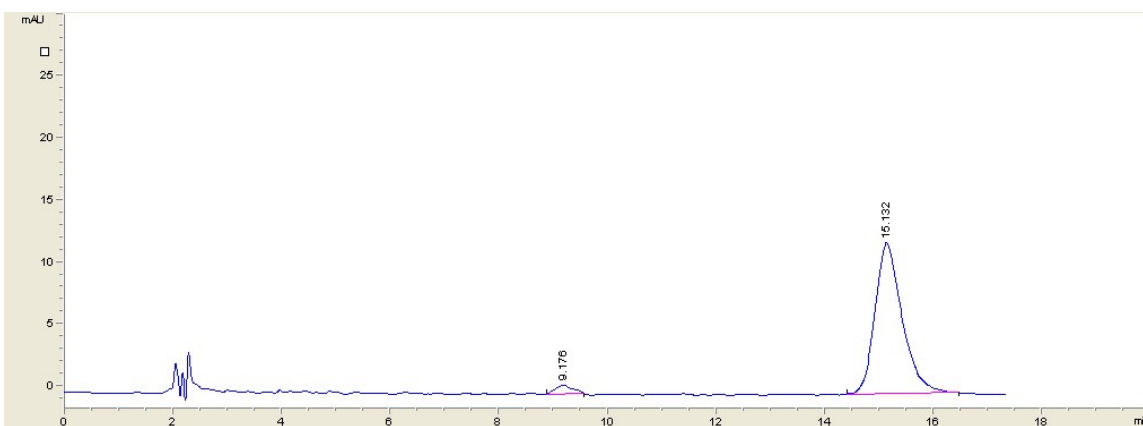

| # | Time   | Area  | Height | Width  | Area%  |
|---|--------|-------|--------|--------|--------|
| 1 | 9.176  | 17.2  | 7.4E-1 | 0.3847 | 3.895  |
| 2 | 15.132 | 423.4 | 12.2   | 0.5787 | 96.105 |

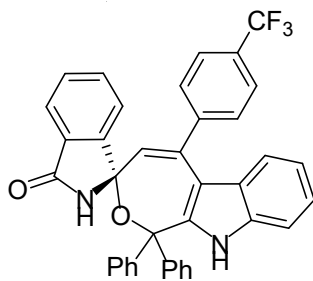

**(S)-1',1'-diphenyl-5'-(4-(trifluoromethyl)phenyl)-1',10'-dihydrospiro[isindoline-1,3'-oxepino[3,4-b]indol]-3-one (3g)**

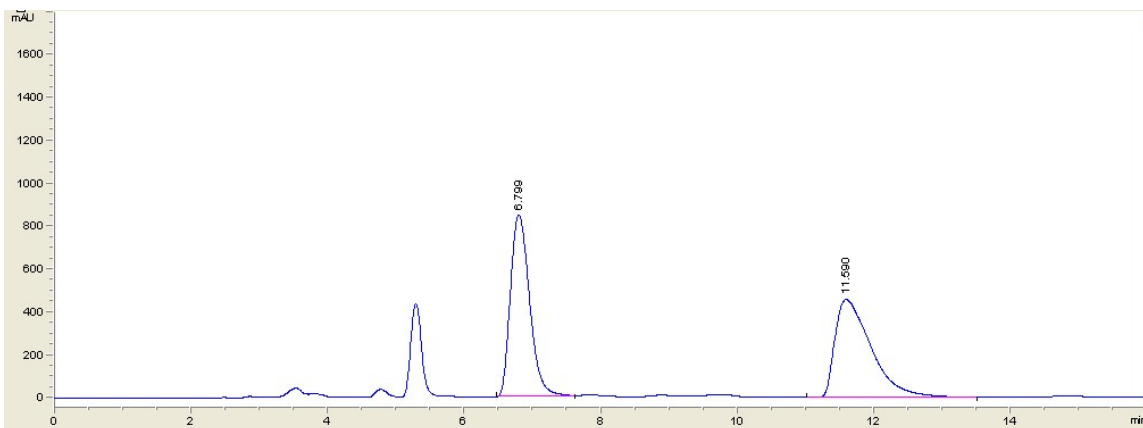

| # | Time  | Area    | Height | Width  | Area%  |
|---|-------|---------|--------|--------|--------|
| 1 | 6.799 | 16659.8 | 847.5  | 0.3276 | 49.955 |
| 2 | 11.59 | 16689.9 | 457.6  | 0.5828 | 50.045 |

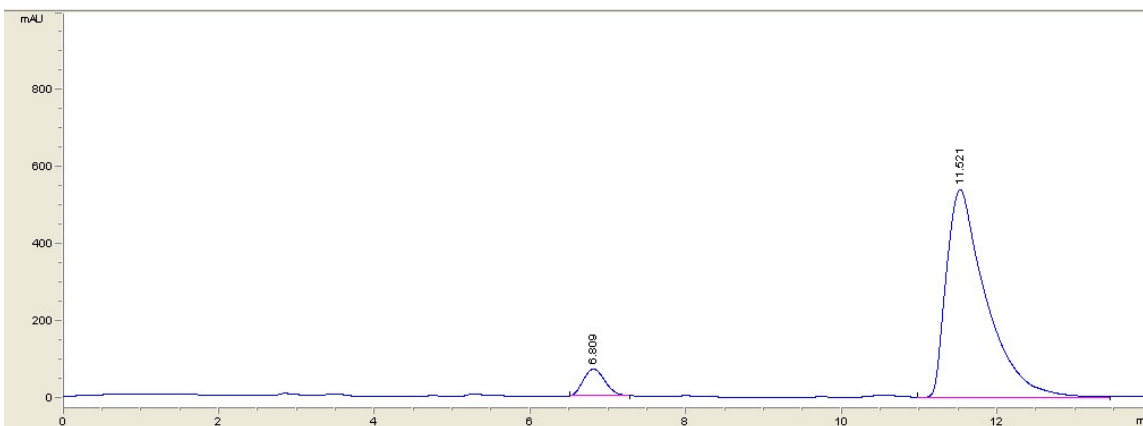

| # | Time   | Area    | Height | Width  | Area%  |
|---|--------|---------|--------|--------|--------|
| 1 | 6.809  | 1350.6  | 69.8   | 0.3226 | 6.503  |
| 2 | 11.521 | 19417.6 | 541.1  | 0.5981 | 93.497 |

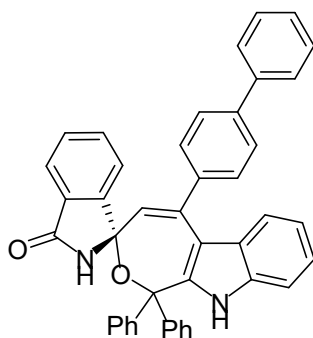

**(S)-5'--([1,1'-biphenyl]-4-yl)-1',1'-diphenyl-1',10'-dihydrospiro[isoindoline-1,3'-oxepino[3,4-b]indol]-3-one (3h)**

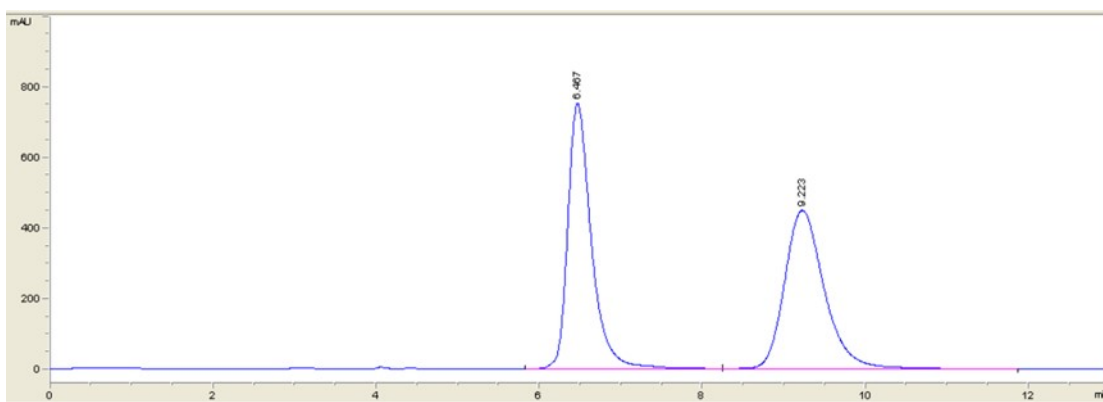

| # | Time  | Area    | Height | Width  | Area%  |
|---|-------|---------|--------|--------|--------|
| 1 | 6.467 | 15325.3 | 753.6  | 0.3071 | 49.790 |
| 2 | 9.223 | 15454.6 | 450    | 0.5244 | 50.210 |

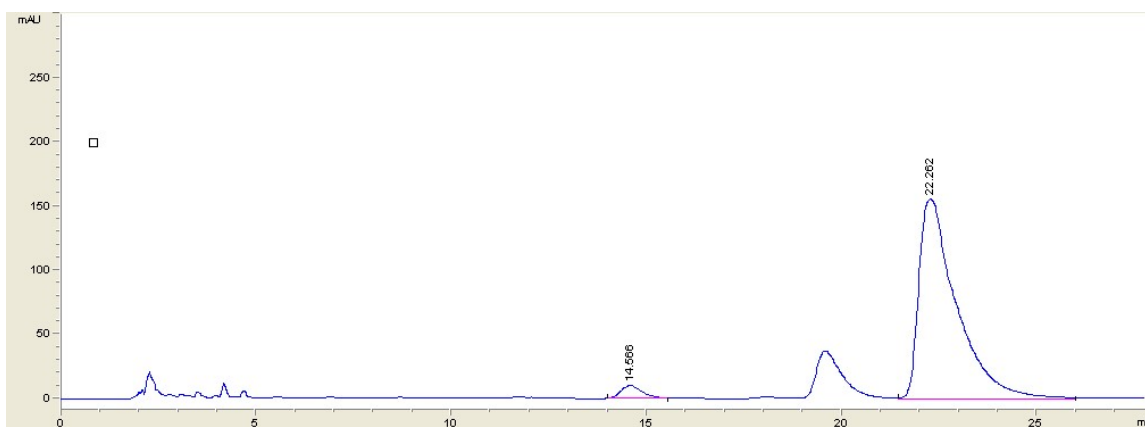

| # | Time   | Area    | Height | Width  | Area%  |
|---|--------|---------|--------|--------|--------|
| 1 | 14.566 | 353.3   | 9.7    | 0.609  | 3.229  |
| 2 | 22.262 | 10589.1 | 156.2  | 1.1295 | 96.771 |

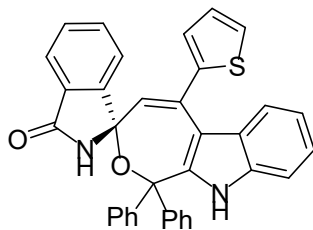

**(S)-1',1'-diphenyl-5'-(thiophen-2-yl)-1',10'-dihydrospiro[isindoline-1,3'-oxepino[3,4-b]indol]-3-one (3i)**

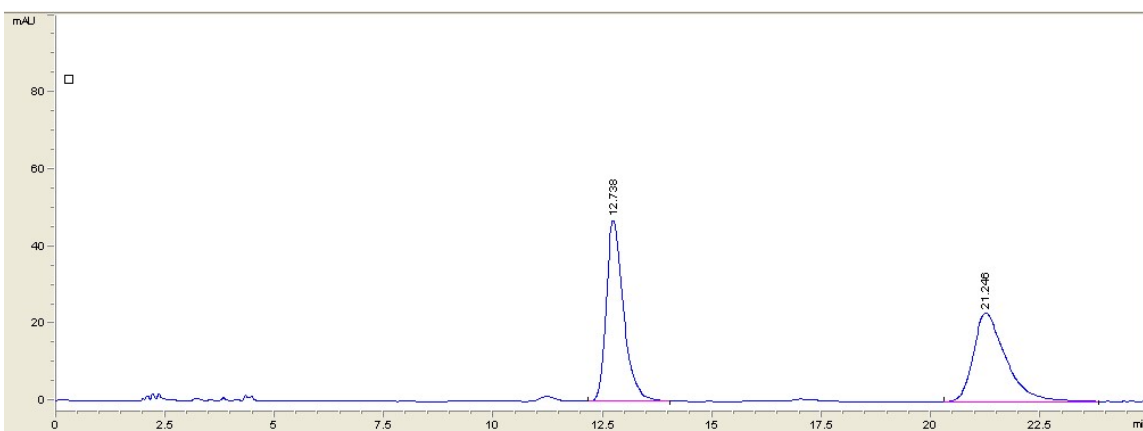

| # | Time   | Area   | Height | Width  | Area%  |
|---|--------|--------|--------|--------|--------|
| 1 | 12.738 | 1285.8 | 46.9   | 0.4131 | 51.483 |
| 2 | 21.246 | 1211.7 | 23     | 0.877  | 48.517 |

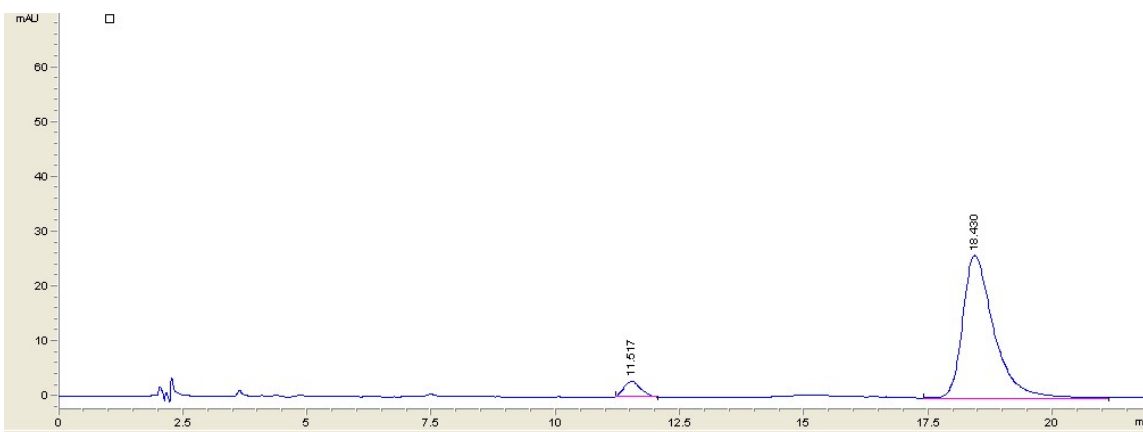

| # | Time   | Area   | Height | Width  | Area%  |
|---|--------|--------|--------|--------|--------|
| 1 | 11.517 | 64.5   | 2.8    | 0.3812 | 5.209  |
| 2 | 18.43  | 1173.2 | 26.3   | 0.7439 | 94.791 |

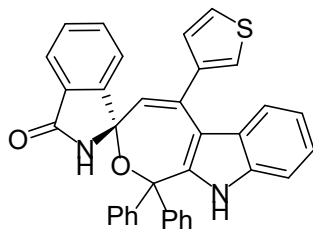

**(S)-1',1'-diphenyl-5'-(thiophen-3-yl)-1',10'-dihydrospiro[isoxindoline-1,3'-oxepino[3,4-b]indol]-3-one (3j)**

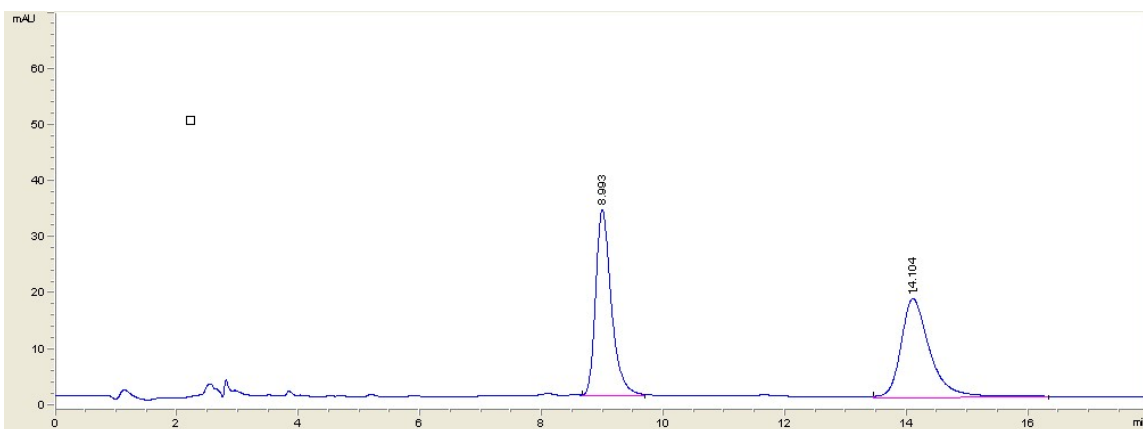

| # | Time   | Area  | Height | Width  | Area%  |
|---|--------|-------|--------|--------|--------|
| 1 | 8.993  | 596.4 | 33.2   | 0.2706 | 49.654 |
| 2 | 14.104 | 604.7 | 17.7   | 0.5697 | 50.346 |

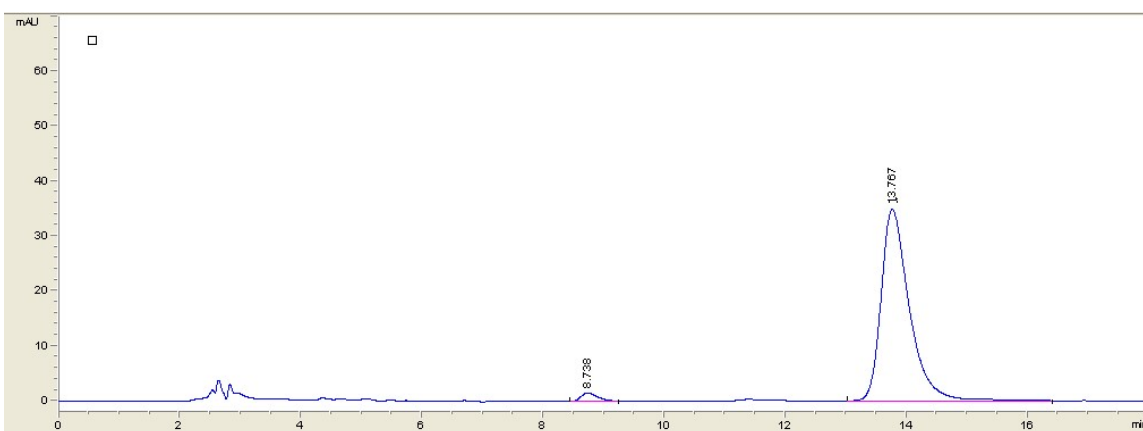

| # | Time   | Area   | Height | Width  | Area%  |
|---|--------|--------|--------|--------|--------|
| 1 | 8.738  | 30.9   | 1.6    | 0.2915 | 2.584  |
| 2 | 13.767 | 1164.3 | 35     | 0.554  | 97.416 |

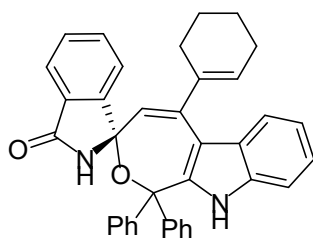

**(S)-5-(cyclohex-1-en-1-yl)-1',1'-diphenyl-1',10'-dihydrospiro[isoindoline-1,3'-oxepino[3,4-b]indol]-3-one (3k)**

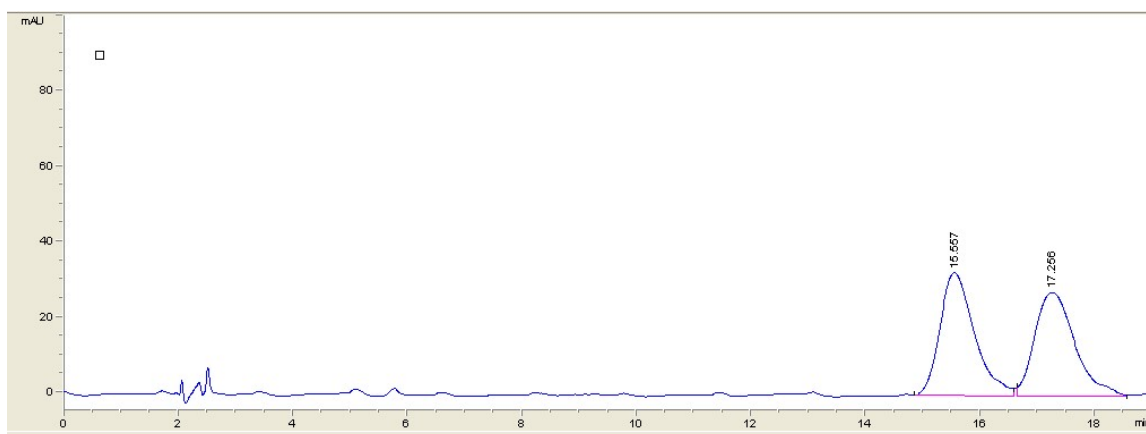

| # | Time   | Area   | Height | Width  | Area%  |
|---|--------|--------|--------|--------|--------|
| 1 | 15.557 | 1377.2 | 32.6   | 0.7032 | 50.939 |
| 2 | 17.256 | 1326.4 | 27.5   | 0.8031 | 49.061 |

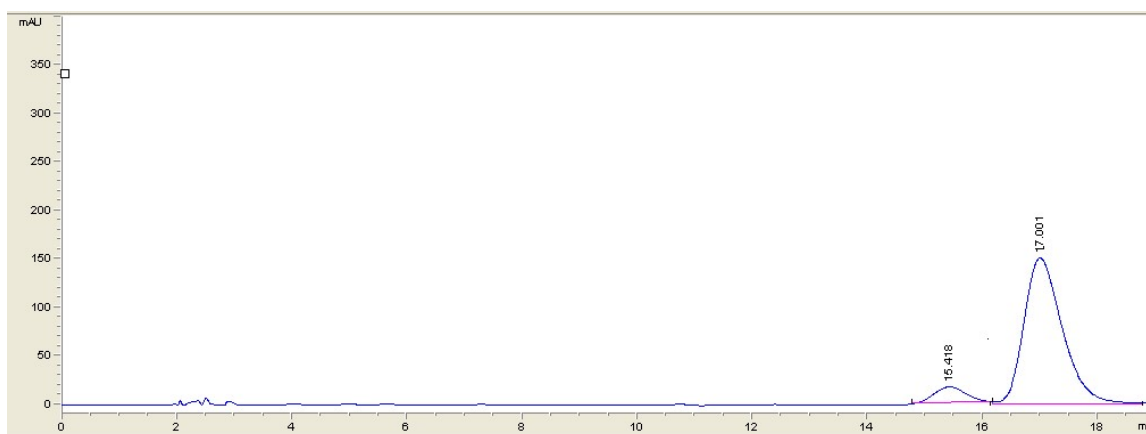

| # | Time   | Area   | Height | Width  | Area%  |
|---|--------|--------|--------|--------|--------|
| 1 | 15.418 | 656.6  | 16.8   | 0.6513 | 8.644  |
| 2 | 17.001 | 6939.7 | 150.8  | 0.7667 | 91.356 |

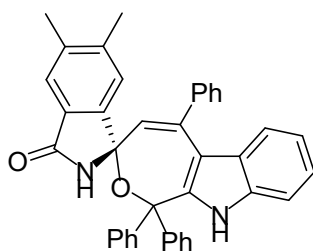

**(S)-5,6-dimethyl-1',1',5'-triphenyl-1',10'-dihydrospiro[isoindoline-1,3'-oxepino[3,4-b]indol]-3-one (3l)**

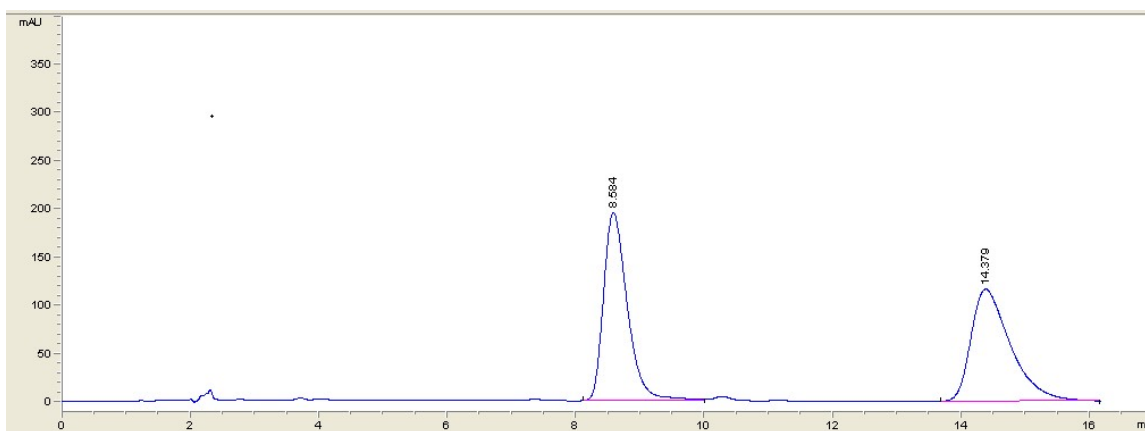

| # | Time   | Area   | Height | Width  | Area%  |
|---|--------|--------|--------|--------|--------|
| 1 | 8.584  | 5046.7 | 194.9  | 0.3981 | 50.447 |
| 2 | 14.379 | 4957.2 | 116.2  | 0.6404 | 49.553 |

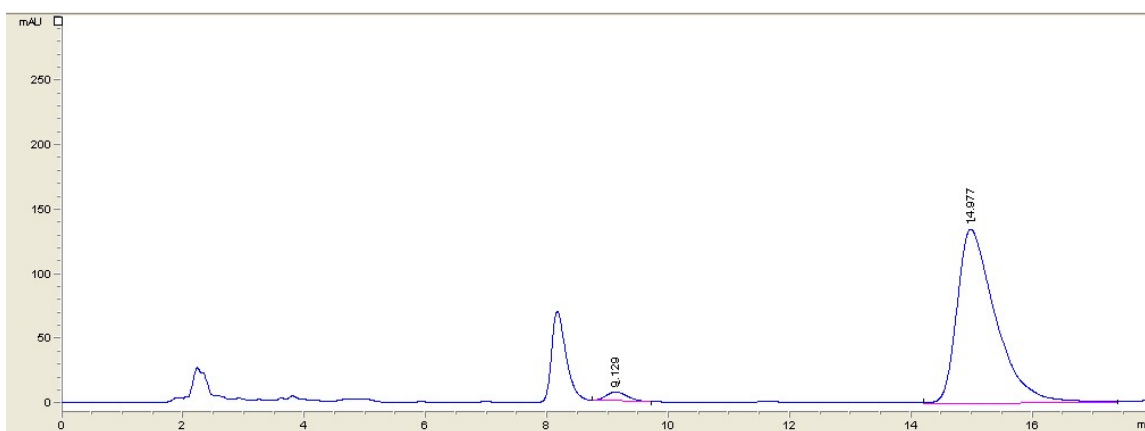

| # | Time   | Area | Height | Width  | Area%  |
|---|--------|------|--------|--------|--------|
| 1 | 9.129  | 192  | 7.3    | 0.4408 | 3.103  |
| 2 | 14.977 | 5997 | 135    | 0.7403 | 96.897 |



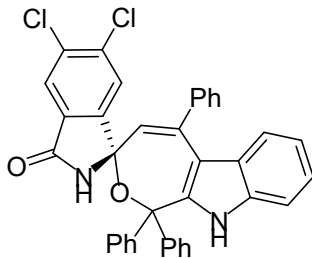

**(S)-5,6-dichloro-1',1',5'-triphenyl-1',10'-dihydrospiro[isoindoline-1,3'-oxepino[3,4-b]indol]-3-one (3m)**

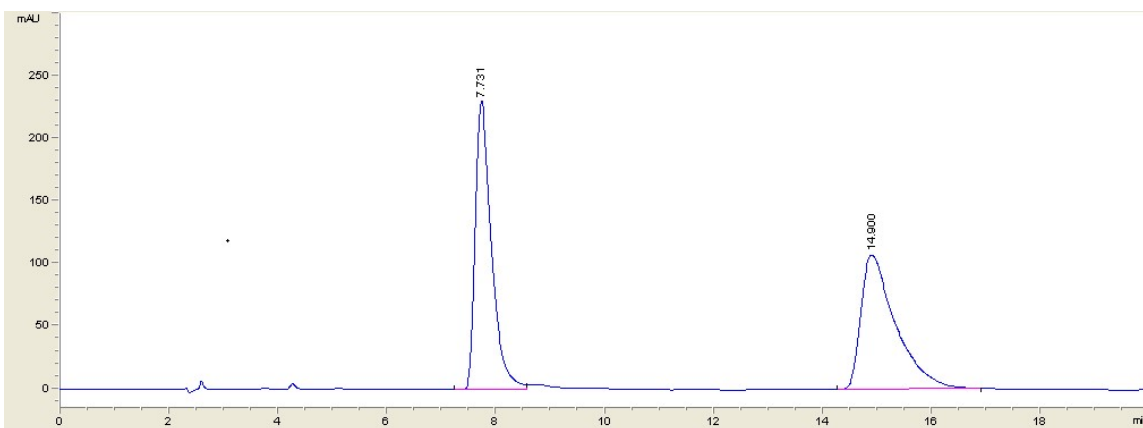

| # | Time  | Area   | Height | Width  | Area%  |
|---|-------|--------|--------|--------|--------|
| 1 | 7.731 | 4763.6 | 230.1  | 0.3144 | 49.973 |
| 2 | 14.9  | 4768.7 | 107.4  | 0.6375 | 50.027 |

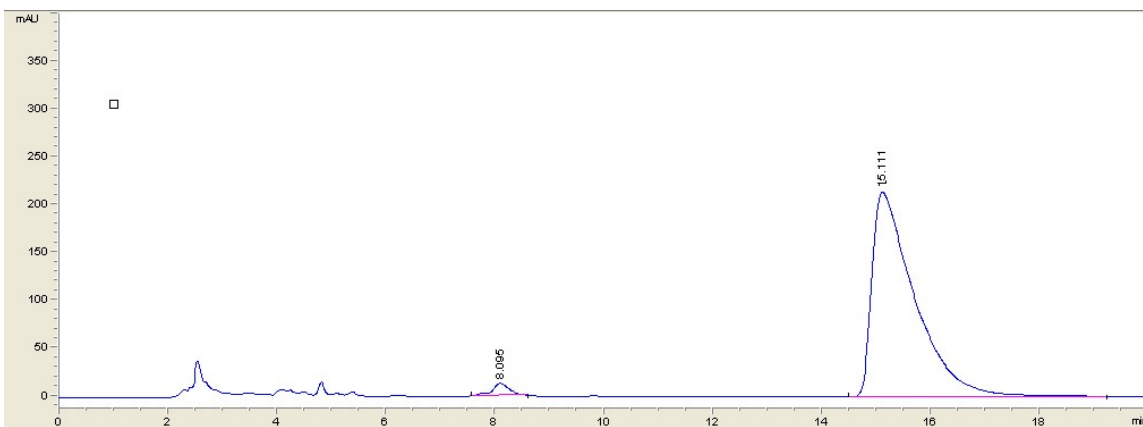

| # | Time   | Area    | Height | Width  | Area%  |
|---|--------|---------|--------|--------|--------|
| 1 | 8.095  | 290.8   | 12.8   | 0.378  | 2.426  |
| 2 | 15.111 | 11697.4 | 214.8  | 0.9077 | 97.574 |

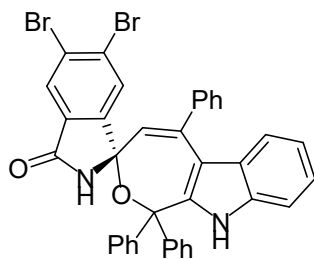

**(S)-5,6-dibromo-1',1',5'-triphenyl-1',10'-dihydrospiro[isindoline-1,3'-oxepino[3,4-b]indol]-3-one (3n)**

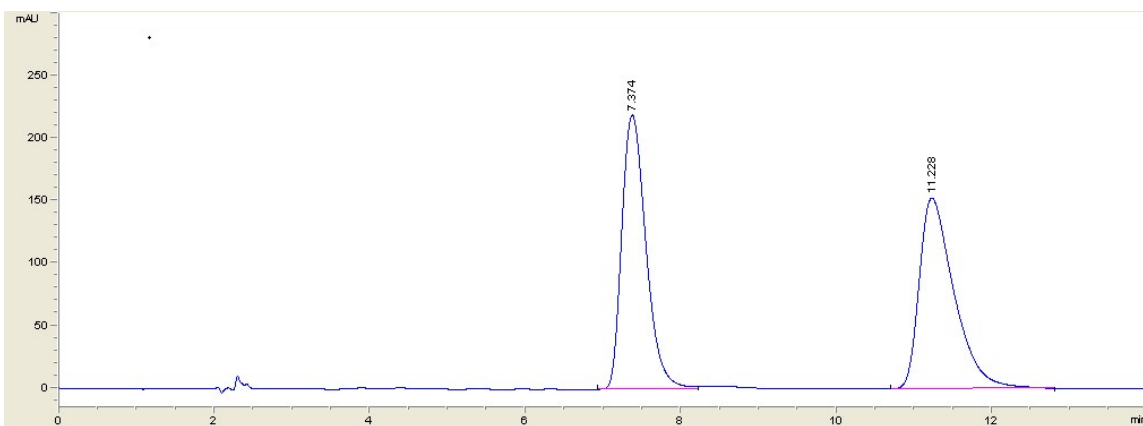

| # | Time   | Area   | Height | Width  | Area%  |
|---|--------|--------|--------|--------|--------|
| 1 | 7.374  | 4758   | 219.3  | 0.3405 | 50.083 |
| 2 | 11.228 | 4742.2 | 152.5  | 0.4706 | 49.917 |

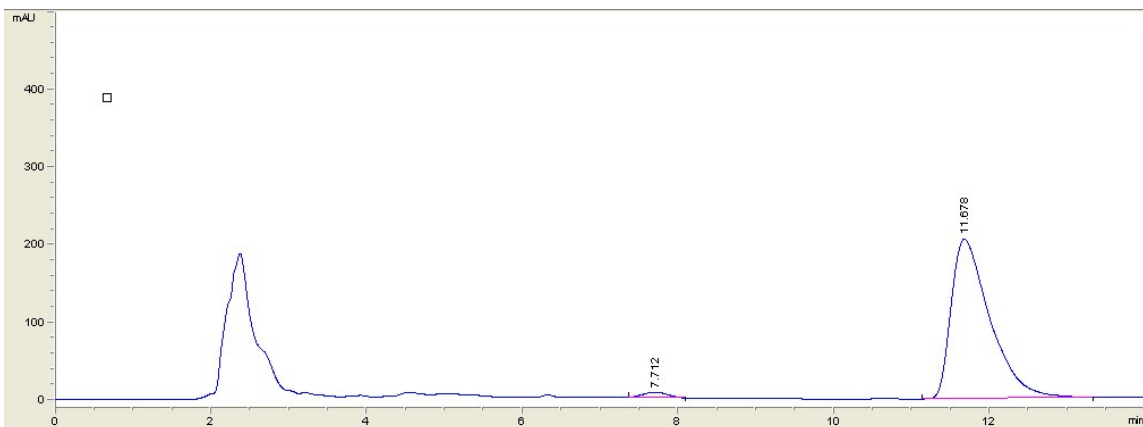

| # | Time   | Area   | Height | Width  | Area%  |
|---|--------|--------|--------|--------|--------|
| 1 | 7.712  | 173.6  | 7.6    | 0.3799 | 2.376  |
| 2 | 11.678 | 7131.3 | 205.4  | 0.5302 | 97.624 |

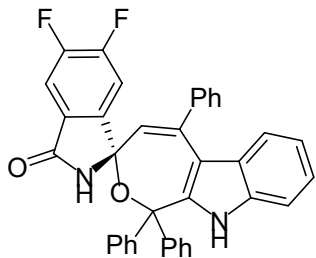

**(S)-5,6-difluoro-1',1',5'-triphenyl-1',10'-dihydrospiro[isindoline-1,3'-oxepino[3,4-b]indol]-3-one (30)**

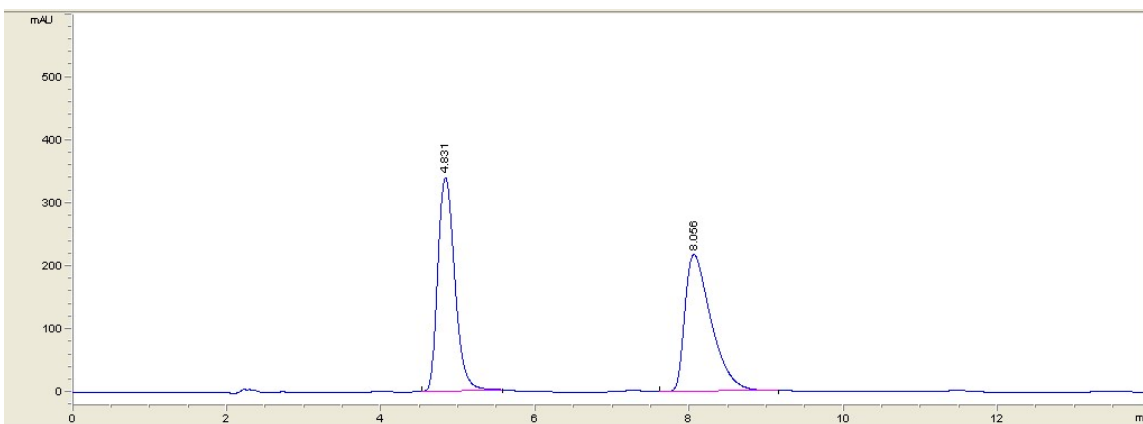

| # | Time  | Area   | Height | Width  | Area%  |
|---|-------|--------|--------|--------|--------|
| 1 | 4.831 | 5249.4 | 339.6  | 0.2576 | 50.400 |
| 2 | 8.056 | 5166.2 | 217.4  | 0.3588 | 49.600 |

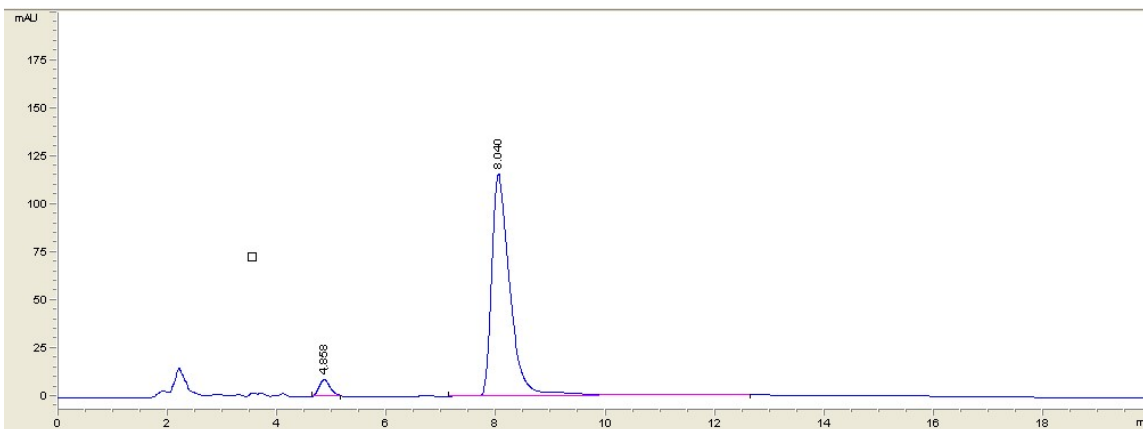

| # | Time  | Area   | Height | Width  | Area%  |
|---|-------|--------|--------|--------|--------|
| 1 | 4.858 | 121.2  | 8.8    | 0.2296 | 4.164  |
| 2 | 8.04  | 2789.4 | 115.9  | 0.4013 | 95.836 |

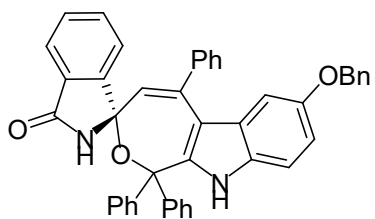

**(S)-7'-(benzyloxy)-1',1',5'-triphenyl-1',10'-dihydrospiro[isindoline-1,3'-oxepino[3,4-b]indol]-3-one (3p)**

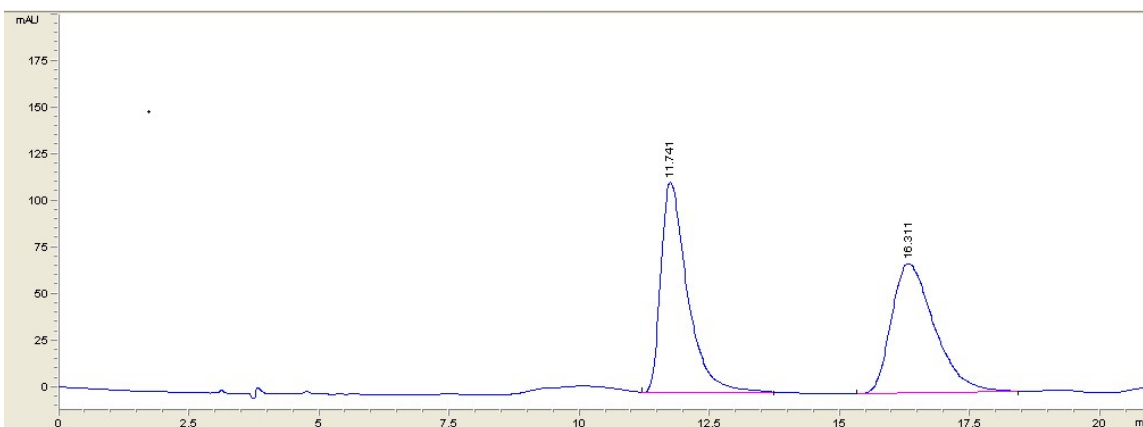

| # | Time   | Area   | Height | Width  | Area%  |
|---|--------|--------|--------|--------|--------|
| 1 | 11.741 | 4046.3 | 112.9  | 0.5417 | 50.467 |
| 2 | 16.311 | 3971.5 | 69.2   | 0.8847 | 49.533 |

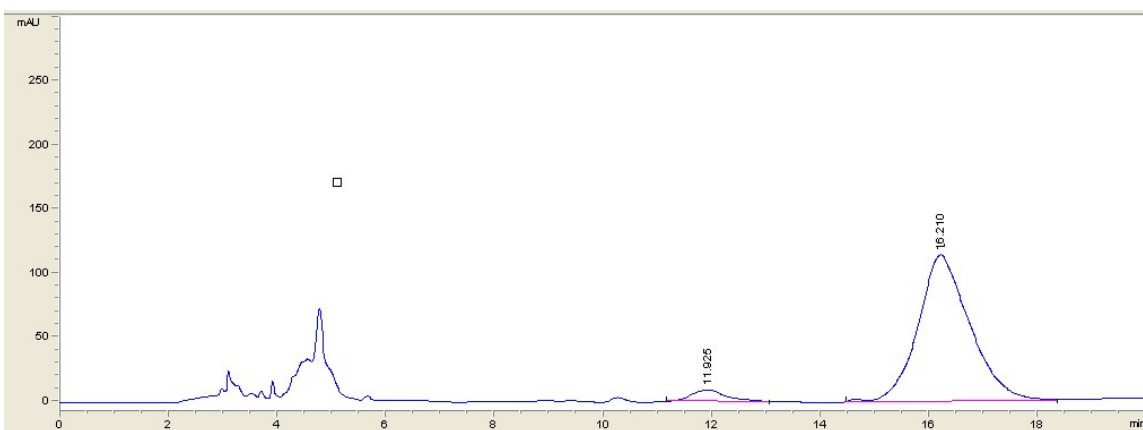

| # | Time   | Area   | Height | Width  | Area%  |
|---|--------|--------|--------|--------|--------|
| 1 | 11.925 | 404.7  | 9      | 0.7455 | 5.029  |
| 2 | 16.21  | 7642.9 | 114.5  | 1.1123 | 94.971 |

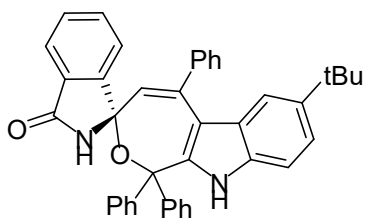

**(S)-7'-(tert-butyl)-1,1',5'-triphenyl-1,10'-dihydrospiro[isoindoline-1,3'-oxepino[3,4-b]indol]-3-one (3q)**

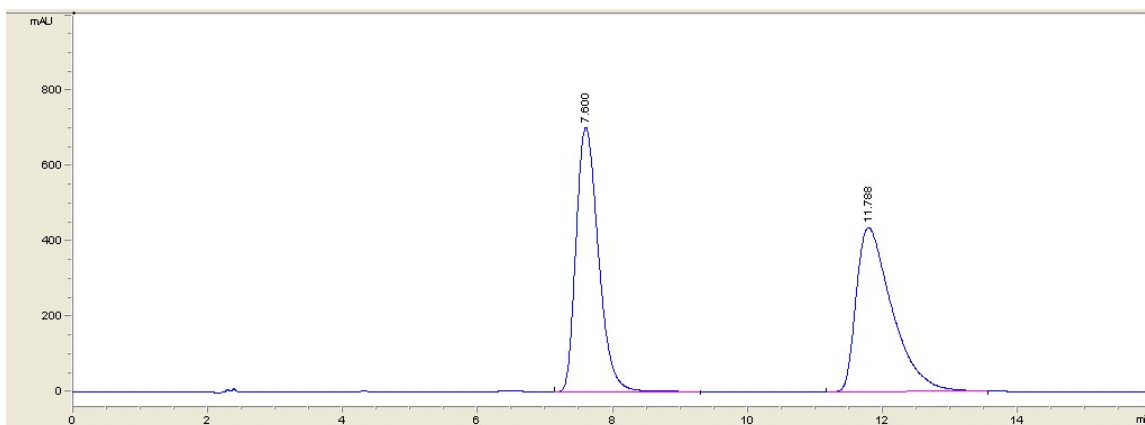

| # | Time   | Area    | Height | Width  | Area%  |
|---|--------|---------|--------|--------|--------|
| 1 | 7.6    | 16320.8 | 703.3  | 0.3639 | 50.150 |
| 2 | 11.788 | 16223.3 | 436.7  | 0.5645 | 49.850 |

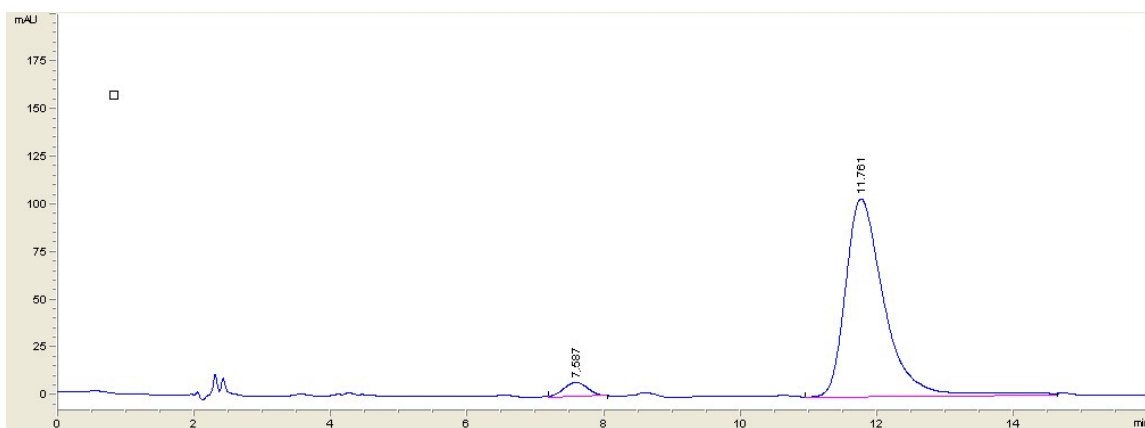

| # | Time   | Area   | Height | Width  | Area%  |
|---|--------|--------|--------|--------|--------|
| 1 | 7.587  | 191.9  | 7.6    | 0.4209 | 4.385  |
| 2 | 11.761 | 4184.4 | 104.3  | 0.6686 | 95.615 |

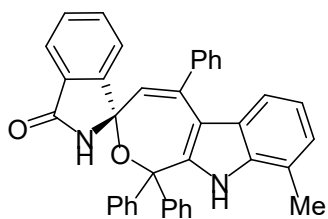

**(S)-9'-methyl-1',1',5'-triphenyl-1',10'-dihydrospiro[isoindoline-1,3'-oxepino[3,4-b]indol]-3-one (3r)**

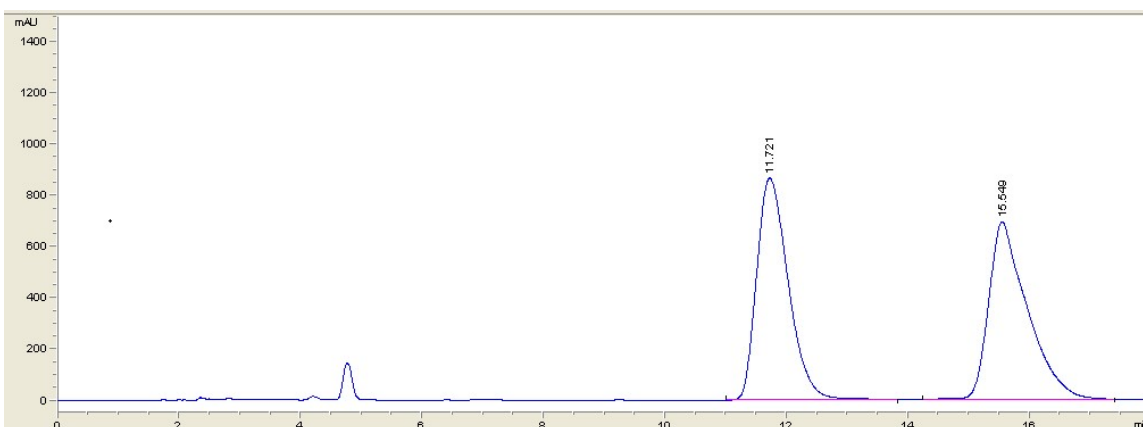

| # | Time   | Area    | Height | Width  | Area%  |
|---|--------|---------|--------|--------|--------|
| 1 | 11.721 | 31319.6 | 866.3  | 0.5674 | 50.320 |
| 2 | 15.549 | 30920.7 | 695.6  | 0.6206 | 49.680 |

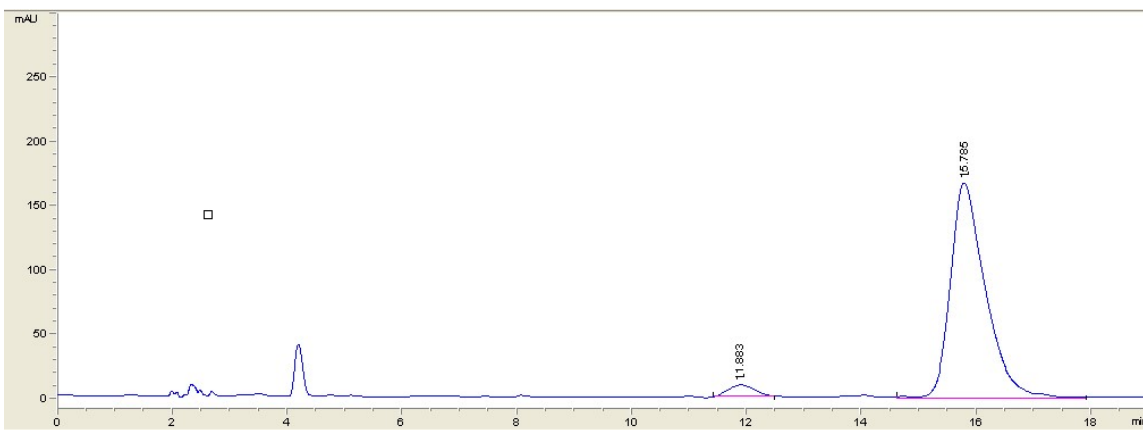

| # | Time   | Area   | Height | Width  | Area%  |
|---|--------|--------|--------|--------|--------|
| 1 | 11.883 | 314.8  | 9.3    | 0.5612 | 4.237  |
| 2 | 15.785 | 7115.8 | 167.5  | 0.708  | 95.763 |

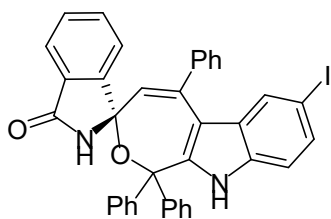

**(S)-7'-iodo-1',1',5'-triphenyl-1',10'-dihydrospiro[isoindoline-1,3'-oxepino[3,4-b]indol]-3-one (3s)**

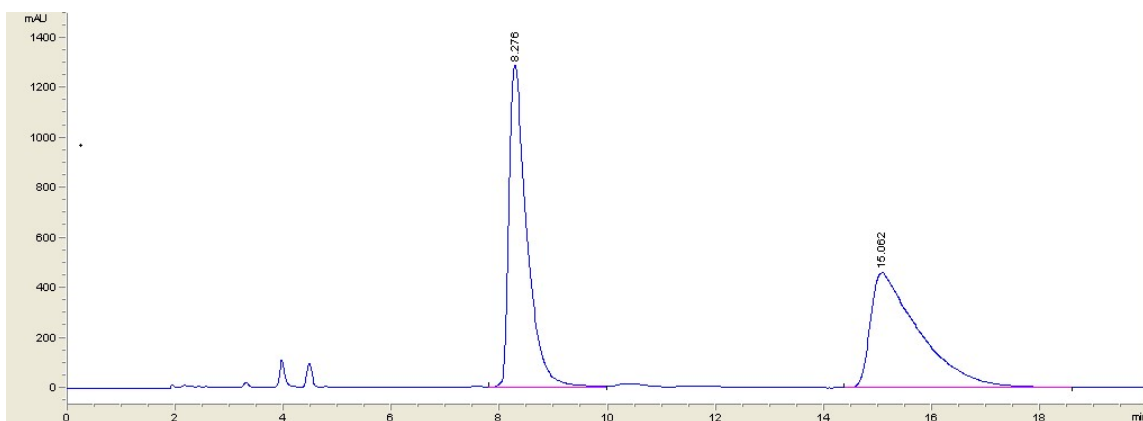

| # | Time   | Area    | Height | Width  | Area%  |
|---|--------|---------|--------|--------|--------|
| 1 | 8.276  | 29724.2 | 1288.5 | 0.339  | 50.852 |
| 2 | 15.062 | 28728.1 | 460.7  | 0.8701 | 49.148 |

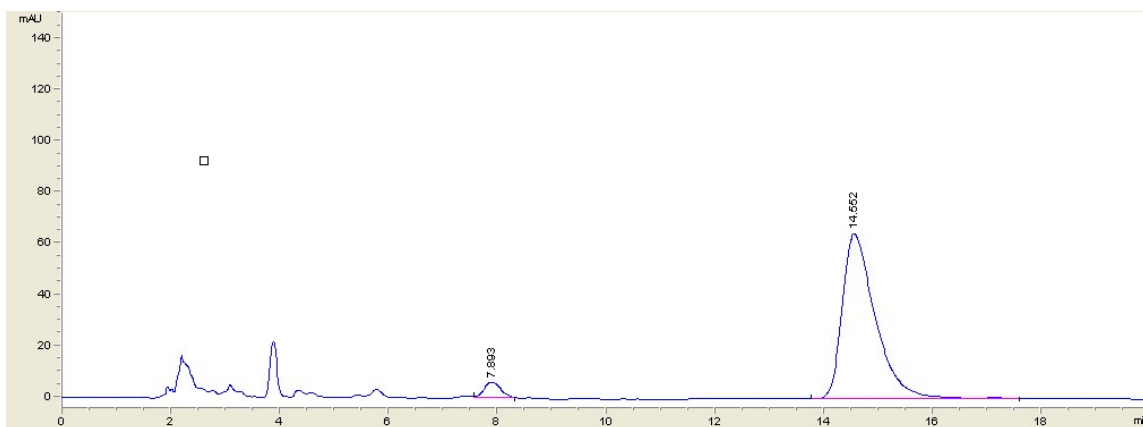

| # | Time   | Area   | Height | Width  | Area%  |
|---|--------|--------|--------|--------|--------|
| 1 | 7.893  | 133.8  | 6.2    | 0.3614 | 4.572  |
| 2 | 14.552 | 2792.1 | 64.8   | 0.7179 | 95.428 |

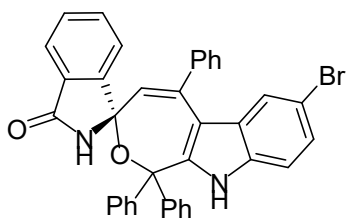

**(S)-7'-bromo-1',1',5'-triphenyl-1',10'-dihydrospiro[isoindoline-1,3'-oxepino[3,4-b]indol]-3-one (3t)**

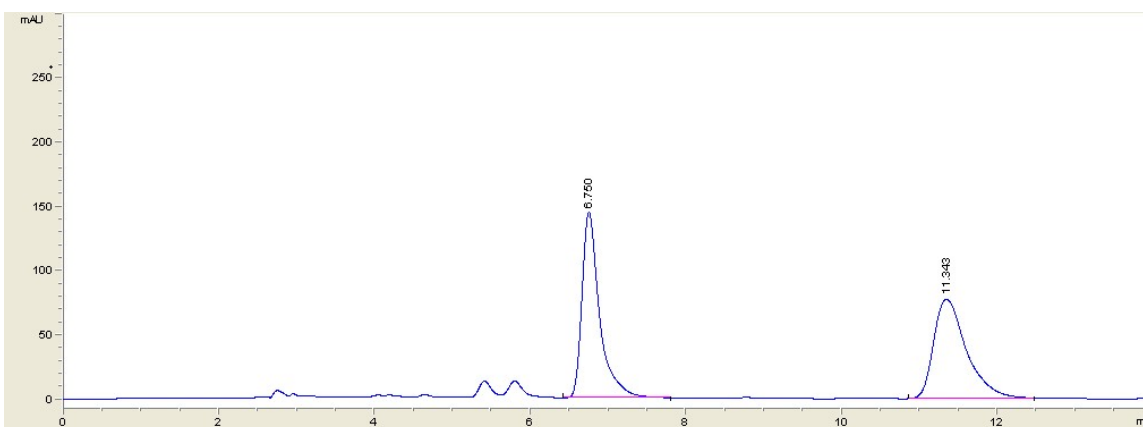

| #* | Time   | Area   | Height | Width  | Area%  |
|----|--------|--------|--------|--------|--------|
| 1  | 6.75   | 2288   | 144.4  | 0.2343 | 50.277 |
| 2  | 11.343 | 2262.8 | 77     | 0.4446 | 49.723 |

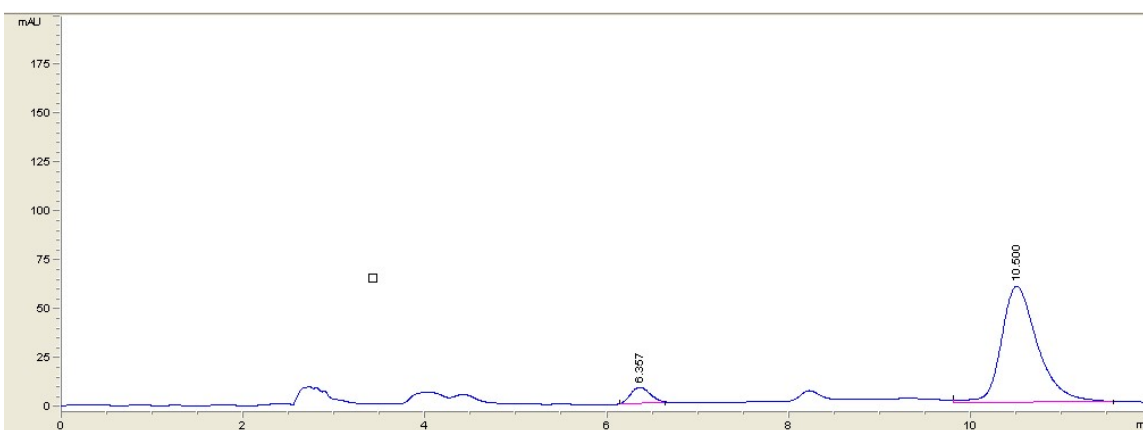

| # | Time  | Area   | Height | Width  | Area%  |
|---|-------|--------|--------|--------|--------|
| 1 | 6.357 | 121.2  | 8.2    | 0.2473 | 6.816  |
| 2 | 10.5  | 1657.5 | 59.4   | 0.4215 | 93.184 |



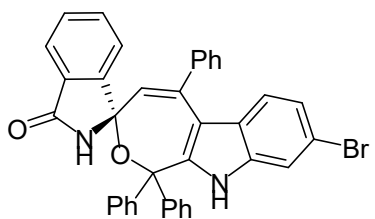

**(S)-8-bromo-1',1',5'-triphenyl-1,10'-dihydrospiro[isoindoline-1,3'-oxepino[3,4-b]indol]-3-one (3u)**

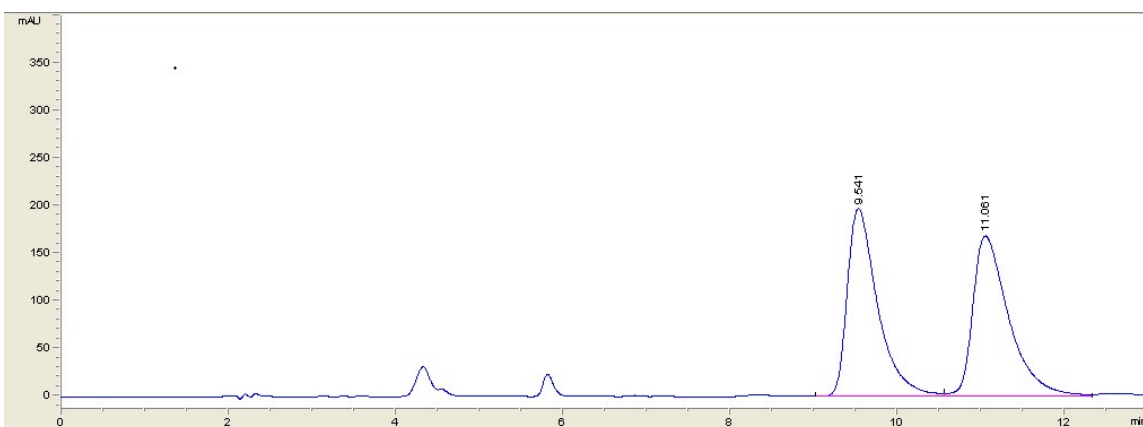

| # | Time   | Area   | Height | Width  | Area%  |
|---|--------|--------|--------|--------|--------|
| 1 | 9.541  | 5016.9 | 197.6  | 0.3806 | 49.648 |
| 2 | 11.061 | 5088   | 168.9  | 0.4535 | 50.352 |

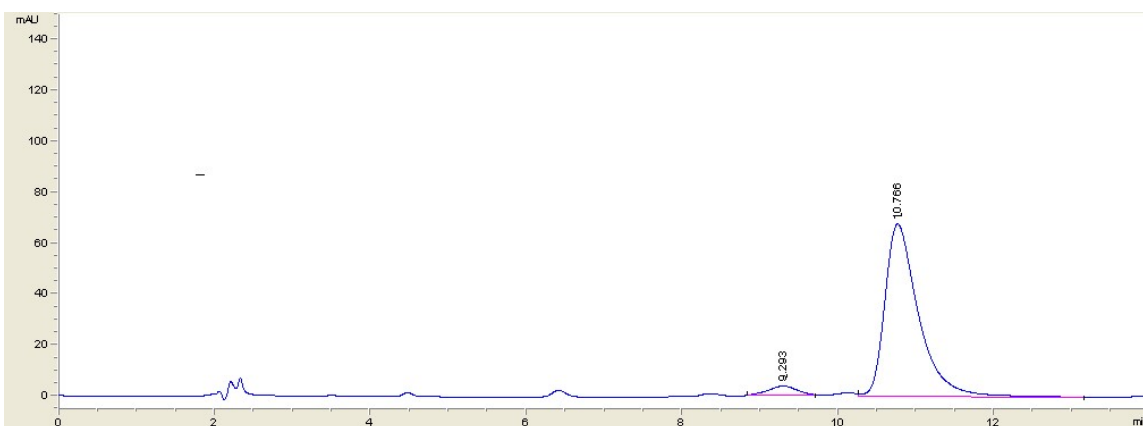

| # | Time   | Area   | Height | Width  | Area%  |
|---|--------|--------|--------|--------|--------|
| 1 | 9.293  | 101.7  | 3.8    | 0.4457 | 4.719  |
| 2 | 10.766 | 2052.7 | 67.8   | 0.5047 | 95.281 |

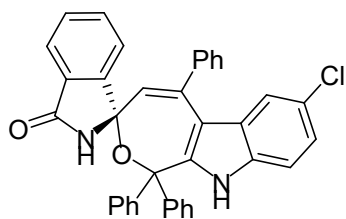

**(S)-7'-chloro-1',1',5'-triphenyl-1',10'-dihydrospiro[isoindoline-1,3'-oxepino[3,4-b]indol]-3-one (3v)**

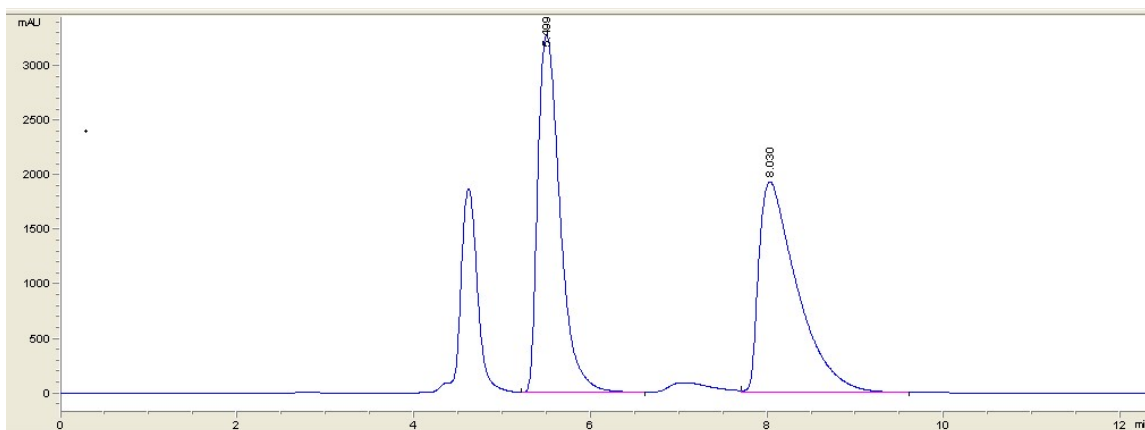

| # | Time  | Area    | Height | Width  | Area%  |
|---|-------|---------|--------|--------|--------|
| 1 | 5.499 | 57909.4 | 3286.4 | 0.2755 | 49.653 |
| 2 | 8.03  | 58718.9 | 1936.2 | 0.4441 | 50.347 |

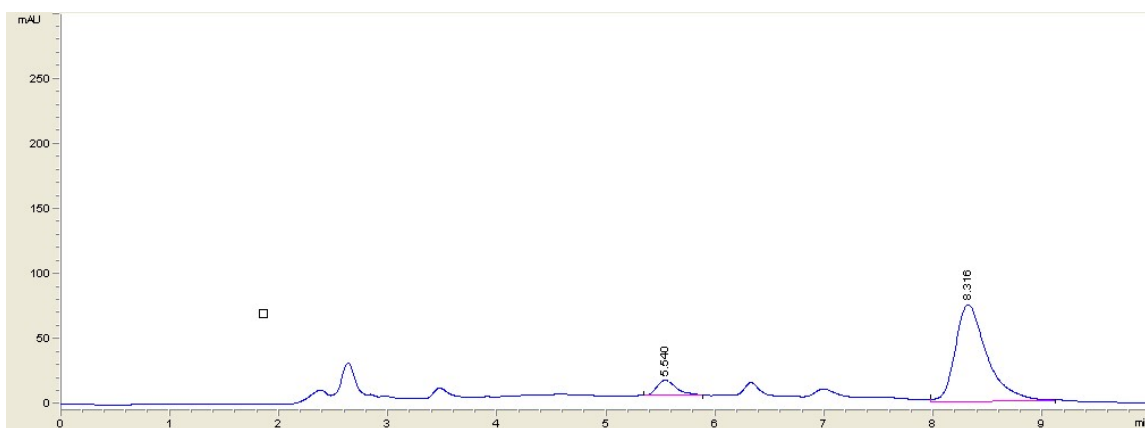

| # | Time  | Area   | Height | Width  | Area%  |
|---|-------|--------|--------|--------|--------|
| 1 | 5.54  | 141.2  | 11.4   | 0.2066 | 8.411  |
| 2 | 8.316 | 1537.9 | 74.8   | 0.3099 | 91.589 |

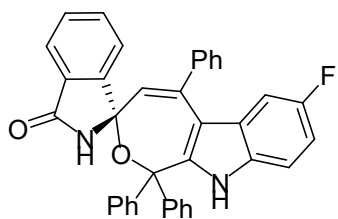

**(S)-7'-fluoro-1',1',5'-triphenyl-1',10'-dihydrospiro[isoindoline-1,3'-oxepino[3,4-b]indol]-3-one (3w)**

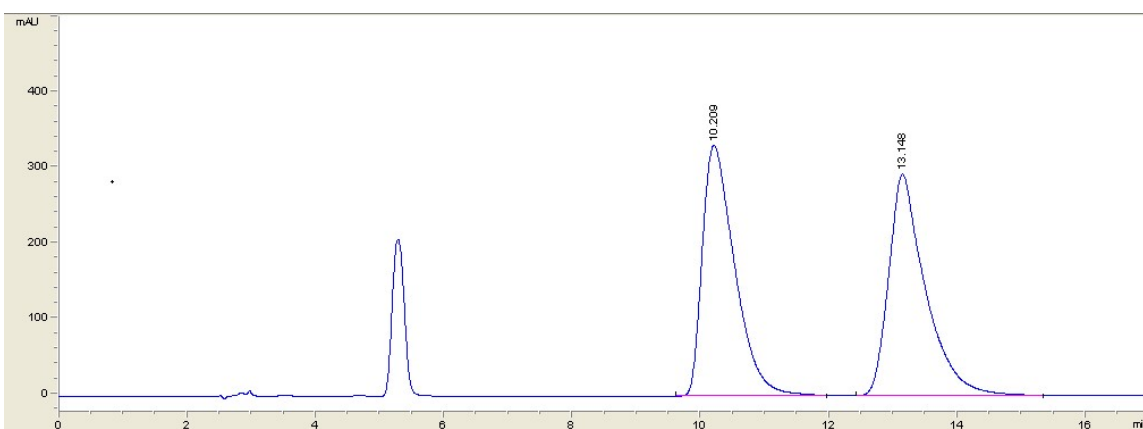

| # | Time   | Area    | Height | Width  | Area%  |
|---|--------|---------|--------|--------|--------|
| 1 | 10.209 | 11662.1 | 331.8  | 0.5324 | 50.028 |
| 2 | 13.148 | 11649   | 293.2  | 0.5625 | 49.972 |

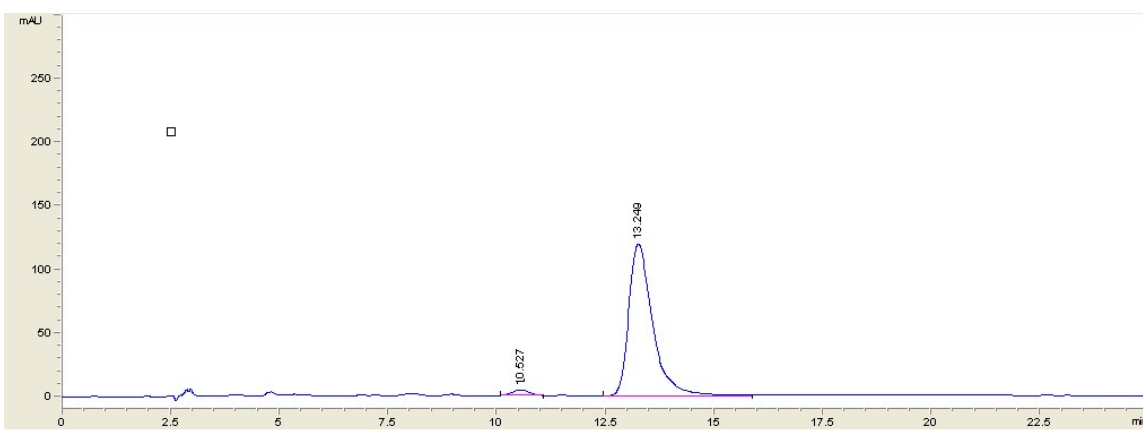

| # | Time   | Area   | Height | Width  | Area%  |
|---|--------|--------|--------|--------|--------|
| 1 | 10.527 | 123    | 4.4    | 0.4647 | 2.584  |
| 2 | 13.249 | 4637.4 | 119.8  | 0.6453 | 97.416 |

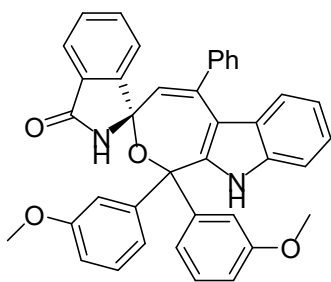

**(S)-1',1'-bis(3-methoxyphenyl)-5'-phenyl-1',10'-dihydrospiro[isoxindole-1,3'-oxepino[3,4-b]indol]-3-one (3x)**

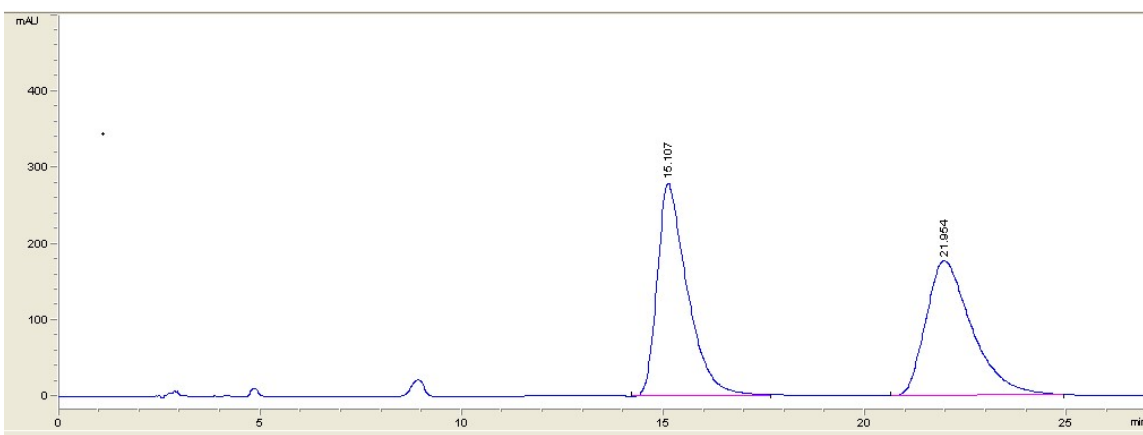

| # | Time   | Area    | Height | Width  | Area%  |
|---|--------|---------|--------|--------|--------|
| 1 | 15.107 | 14503.3 | 278.9  | 0.7523 | 50.816 |
| 2 | 21.954 | 14037.6 | 176.7  | 1.1889 | 49.184 |

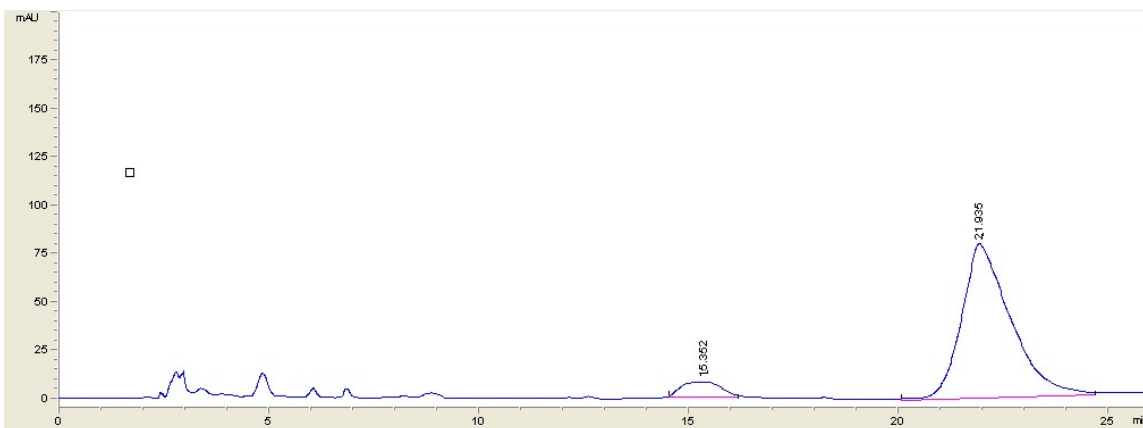

| # | Time   | Area   | Height | Width  | Area%  |
|---|--------|--------|--------|--------|--------|
| 1 | 15.352 | 509.4  | 7.8    | 1.0861 | 7.254  |
| 2 | 21.935 | 6513.5 | 80     | 1.3569 | 92.746 |

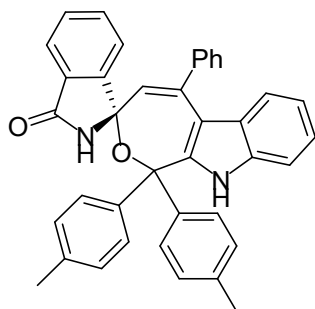

**(S)-5'-phenyl-1',1'-di-p-tolyl-1',10'-dihydrospiro[isindoline-1,3'-oxepino[3,4-b]indol]-3-one (3y)**

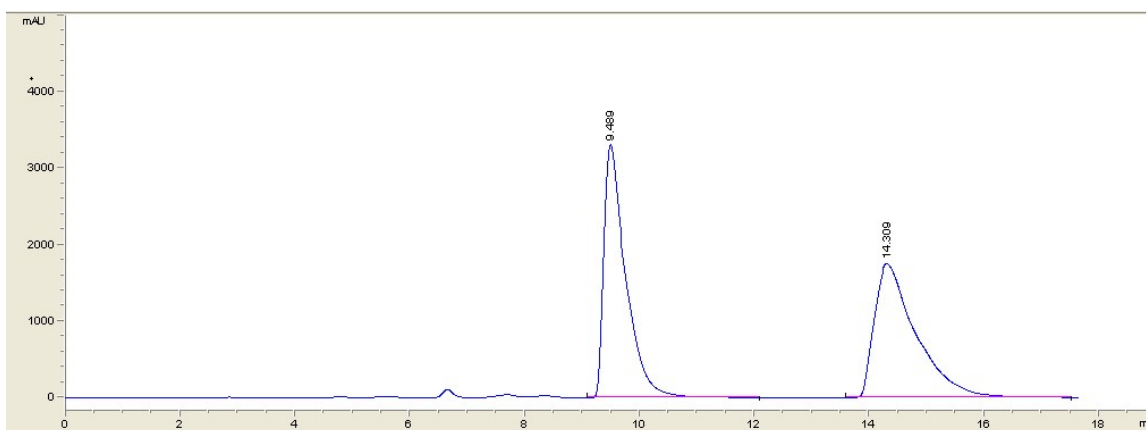

| # | Time   | Area    | Height | Width  | Area%  |
|---|--------|---------|--------|--------|--------|
| 1 | 9.489  | 87976.5 | 3299.2 | 0.3868 | 50.064 |
| 2 | 14.309 | 87750.1 | 1747.3 | 0.7548 | 49.936 |

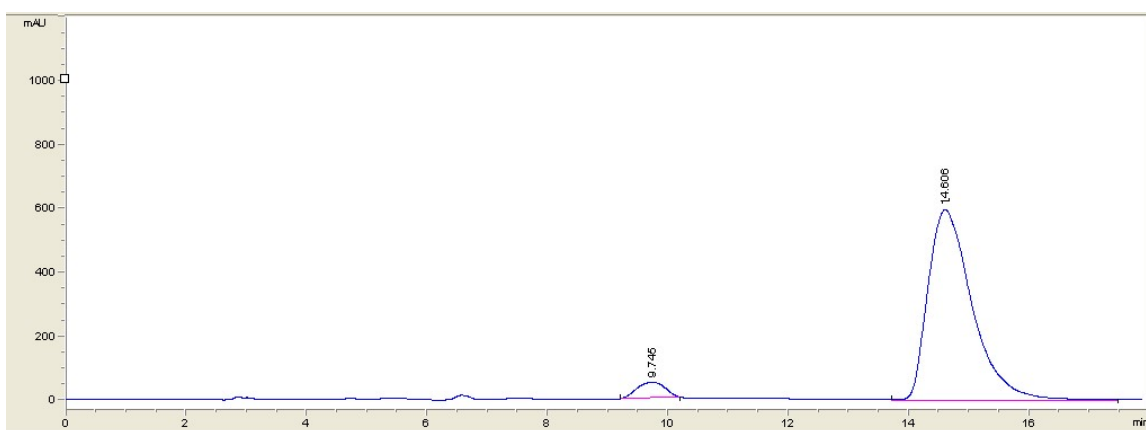

| # | Time   | Area    | Height | Width  | Area%  |
|---|--------|---------|--------|--------|--------|
| 1 | 9.745  | 1756.1  | 51.5   | 0.568  | 5.360  |
| 2 | 14.606 | 31005.9 | 598.6  | 0.8632 | 94.640 |

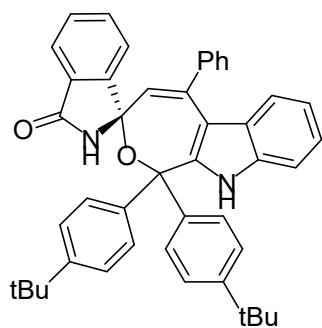

**(S)-1',1'-bis(4-(tert-butyl)phenyl)-5'-phenyl-1',10'-dihydrospiro[isoindoline-1,3'-oxepino[3,4-b]indol]-3-one (3z)**

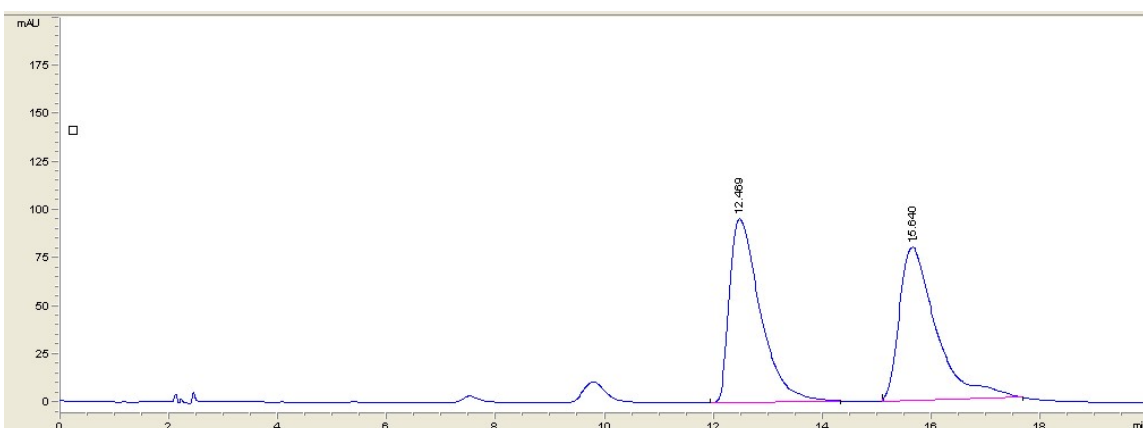

| # | Time   | Area   | Height | Width  | Area%  |
|---|--------|--------|--------|--------|--------|
| 1 | 12.469 | 3740.8 | 95.5   | 0.5849 | 49.834 |
| 2 | 15.64  | 3765.7 | 79.8   | 0.7861 | 50.166 |

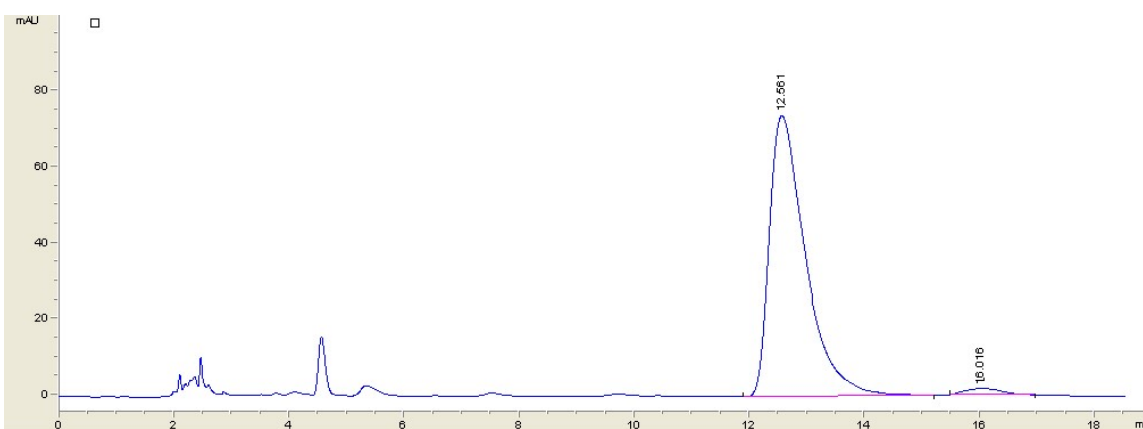

| # | Time   | Area   | Height | Width  | Area%  |
|---|--------|--------|--------|--------|--------|
| 1 | 12.561 | 3218.4 | 73.8   | 0.7265 | 97.779 |
| 2 | 16.016 | 73.1   | 1.7    | 0.7344 | 2.221  |

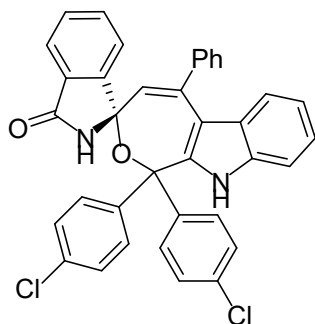

**(S)-1',1'-bis(4-chlorophenyl)-5'-phenyl-1',10'-dihydrospiro[isoindoline-1,3'-oxepino[3,4-b]indol]-3-one (3aa)**

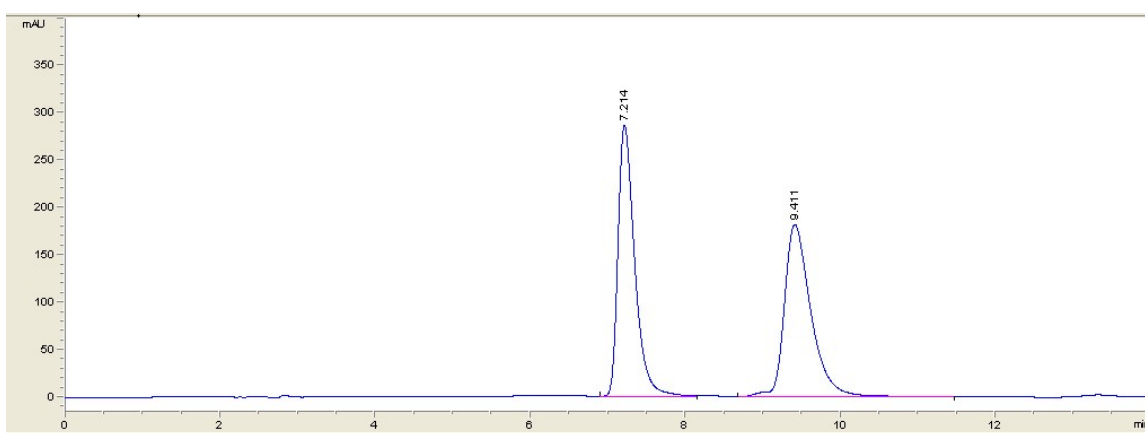

| # | Time  | Area   | Height | Width  | Area%  |
|---|-------|--------|--------|--------|--------|
| 1 | 7.214 | 4376.9 | 287.3  | 0.2302 | 49.587 |
| 2 | 9.411 | 4449.9 | 182.3  | 0.3662 | 50.413 |

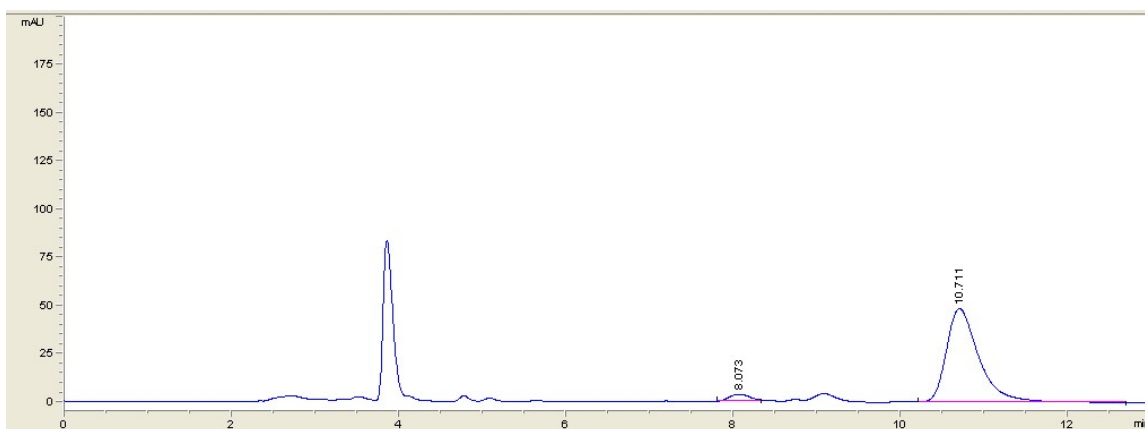

| # | Time   | Area   | Height | Width  | Area%  |
|---|--------|--------|--------|--------|--------|
| 1 | 8.073  | 66.3   | 3.7    | 0.2962 | 4.791  |
| 2 | 10.711 | 1316.7 | 48.5   | 0.4097 | 95.209 |

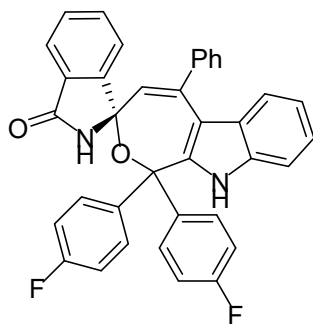

**(S)-1',1'-bis(4-fluorophenyl)-5'-phenyl-1',10'-dihydrospiro[isoindoline-1,3'-oxepino[3,4-b]indol]-3-one (3ab)**

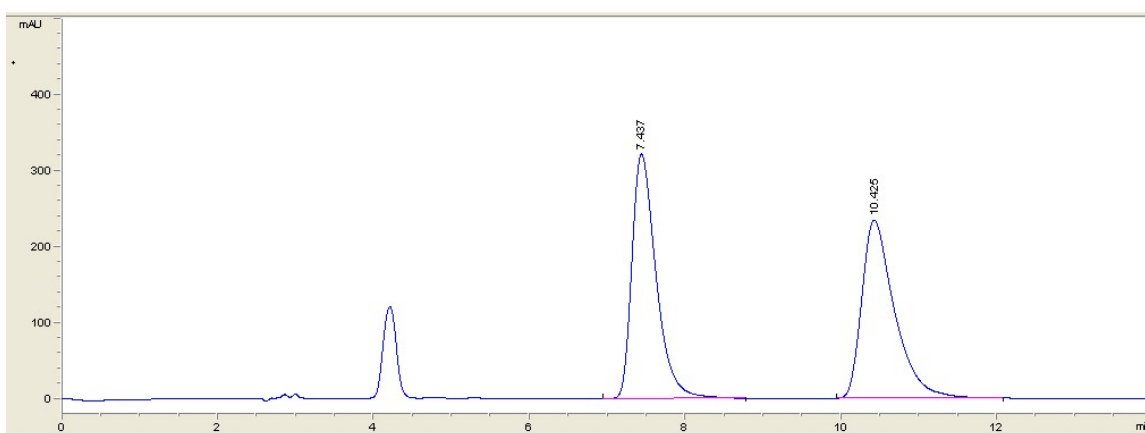

| # | Time   | Area   | Height | Width  | Area%  |
|---|--------|--------|--------|--------|--------|
| 1 | 7.437  | 6948   | 321.5  | 0.3308 | 50.189 |
| 2 | 10.425 | 6895.6 | 234.2  | 0.4366 | 49.811 |

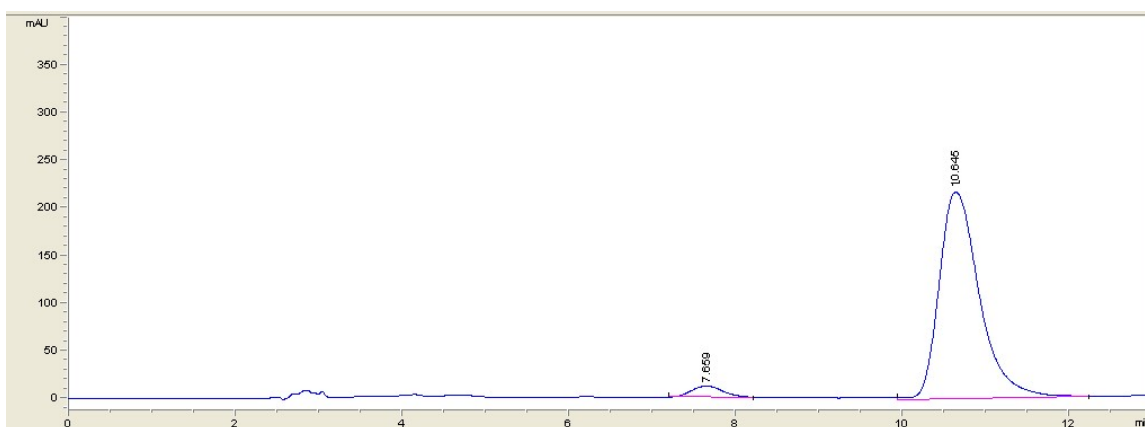

| # | Time   | Area   | Height | Width  | Area%  |
|---|--------|--------|--------|--------|--------|
| 1 | 7.659  | 340.2  | 12.1   | 0.4691 | 4.410  |
| 2 | 10.645 | 7374.3 | 217.4  | 0.5652 | 95.590 |



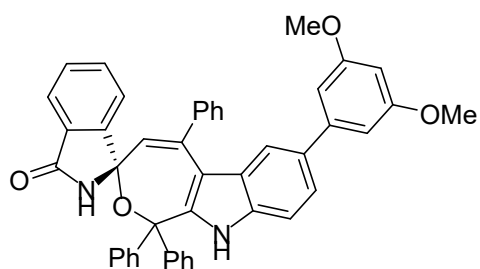

**(S)-7'-(3,5-dimethoxyphenyl)-1',1',5'-triphenyl-1',10'-dihydrospiro[isoindoline-1,3'-oxepino[3,4-b]indol]-3-one (8)**

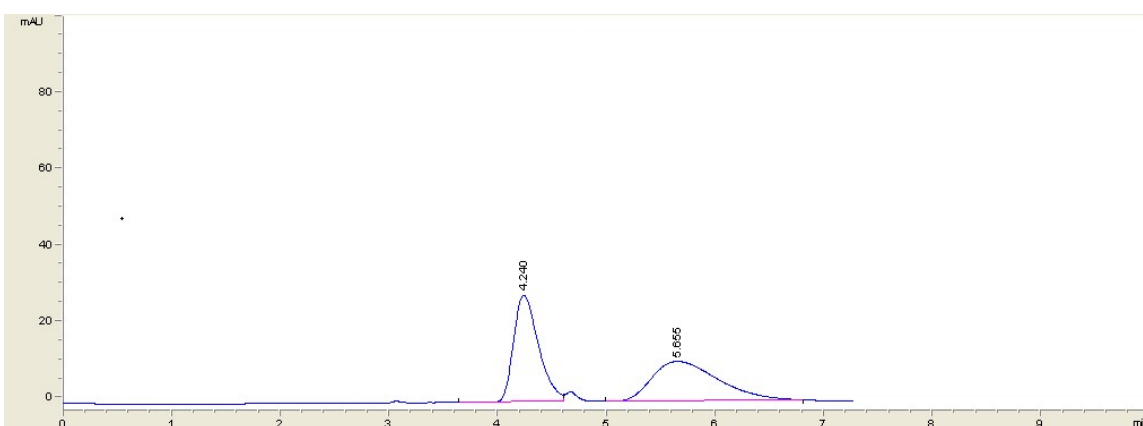

| # | Time  | Area  | Height | Width  | Area%  |
|---|-------|-------|--------|--------|--------|
| 1 | 4.24  | 452.5 | 28.1   | 0.2477 | 49.947 |
| 2 | 5.655 | 453.4 | 10.5   | 0.6573 | 50.053 |

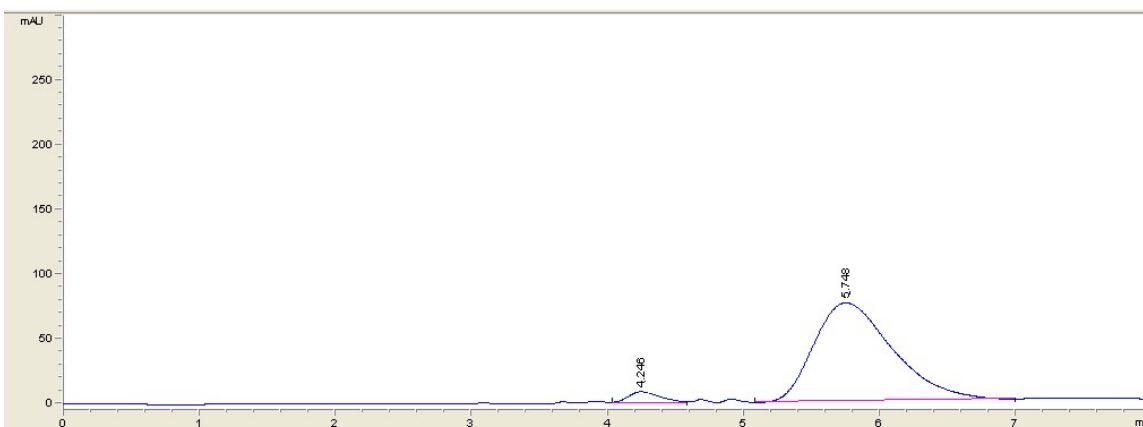

| # | Time  | Area   | Height | Width  | Area%  |
|---|-------|--------|--------|--------|--------|
| 1 | 4.246 | 138.9  | 8.5    | 0.2732 | 4.337  |
| 2 | 5.748 | 3062.8 | 76.1   | 0.6707 | 95.663 |

### 13. References

- [1] Y.-Y. He, X.-X. Sun, G.-H. Li, G.-J. Mei, F. Shi, *J. Org. Chem.*, 2017, **82**, 2462–2471.
- [2] X.-X. Sun, H.-H. Zhang, G.-H. Li, Y.-Y. He, F. Shi, *Chem. Eur. J.*, 2016, **22**, 17526-17532.
- [3] J. Mao, H. Zhang, X.-F. Ding, X. Luo, W.-P. Deng, *J. Org. Chem.*, 2019, **84**, 11186–11194.
- [4] M. Sun, C. Ma, S.-J. Zhou, S.-F. Lou, J. Xiao, Y. Jiao, F. Shi, *Angew. Chem. Int. Ed.*, 2019, **58**, 8703–8708.
- [5] Z. W. Qiu, B. Q. Li, H. F. Liu, Z. Q. Zhu, H. P. Pan, N. Feng, A. J. Ma, J. B. Peng, X. Z. Zhang, *J. Org. Chem.*, 2021, **86**, 7490-7499.
- [6] C. Qian, T. Huang, J. Sun, P. Li, *Org. Lett.*, 2022, **24**, 6472-6476.
- [7] R. A. Unhale, M. M. Sadhu, V. K. Singh, *Org. Lett.*, 2022, **24**, 3319-3324.
- [8] C. Qian, M. Liu, J. Sun, P. Li, *Org. Chem. Front.*, 2022, **9**, 1234-1240.
- [9] H.-Q. Wang, S.-F. Wu, J.-R. Yang, Y.-C. Zhang, F. Shi, *J. Org. Chem.*, 2022, **88**, 7684-7702.
- [10] Y. Xia, M. Liu, C. Qian, P. Li, M. Dong, W. Li, *Org. Chem. Front.*, 2023, **10**, 30-34.
- [11] C. Khajuria, M. M. Sadhu, R. A. Unhale, V. K. Singh, *Tetrahedron Letters.*, 2022, **112**.
